# Supplementary material for: Association between PPARγ, PPARGC1A, and PPARGC1B genetic variants and susceptibility of gastric cancer in an Eastern Chinese population
Source: BMC Med Genomics. 2022 Dec 31;15:274. doi: 10.1186/s12920-022-01428-0 (PMC9805199; doi:10.1186/s12920-022-01428-0)
Supplement: Supplementary file 7 — Additional file 7. Raw_data. [file 12920_2022_1428_MOESM7_ESM.xlsx]

## Sheet: 490-1476-cby
DISEASE	NO_	PATIENTS	PATIENTS number	SEX	AGE	SMOKING	DRINKING	HIGHT111	HIGHT	WEIGHT	BMI	NO_1	SIMPLE_NAM	RS17572019	RS1801282	RS2970847	RS3856806	RS7732671	RS8192678
1	FW001		1	2	72	0	0	159	1.59	57	0	FW001	FW001	G/A	C/C	C/C	C/T	G/C	T/T
1	FW002		2	1	63	0	0	178	1.78	75	0	FW002	FW002	G/G	C/C	C/T	C/T	G/G	C/T
1	FW003		3	1	63	0	0	160	1.6	66	1	FW003	FW003	G/G	C/C	C/C	C/C	G/G	C/C
1	FW004		4	1	52	1	0	160	1.6	50	0	FW004	FW004	G/G	C/C	C/T	C/C	G/G	C/T
1	FW005		5	1	66	1	1	158	1.58	45	0	FW005	FW005	G/G	C/C	C/C	C/C	G/G	T/T
1	FW006		6	1	49	0	0	170	1.7	60	0	FW006	FW006	G/G	C/C	C/T	C/T	G/G	C/T
1	FW008		7	2	54	0	0	157	1.57	65	1	FW008	FW008	G/G	C/C	C/C	C/T	G/G	C/T
1	FW009		8	2	44	0	0	161	1.61	52	0	FW009	FW009	G/G	C/C	C/T	C/C	G/G	C/T
1	FW010		9	1	71	1	0	153	1.53	56	0	FW010	FW010	G/G	C/C	C/C	C/T	G/G	C/T
1	FW011		10	1	50	1	0	167	1.67	64	0	FW011	FW011	G/G	C/C	C/T	C/C	G/G	C/C
1	FW013		11	1	69	0	0	165	1.65	70	1	FW013	FW013	G/G	C/C	C/C	C/T	G/G	C/T
1	FW015		12	1	53	0	0	168	1.68	64	0	FW015	FW015	G/G	C/C	C/C	C/T	G/G	T/T
1	FW016		13	1	83	0	0	164	1.64	53	0	FW016	FW016	G/G	C/C	C/T	T/T	G/G	C/T
1	FW017		14	1	83	0	0	165	1.65	82	1	FW017	FW017	G/A	C/C	C/C	C/C	G/C	C/C
1	FW018		15	1	48	0	1	167	1.67	60	0	FW018	FW018	G/G	C/C	C/C	C/C	G/G	C/T
1	FW019		16	1	65	1	0	173	1.73	60	0	FW019	FW019	G/G	C/C	C/T	C/T	G/G	C/C
1	FW020		17	1	69	0	0	166	1.66	72	1	FW020	FW020	G/G	C/C	C/C	C/C	G/G	T/T
1	FW021		18	1	77	0	0	170	1.7	69	0	FW021	FW021	G/A	C/C	C/C	C/C	G/C	C/T
1	FW022		19	2	53	0	0	153	1.53	56	0	FW022	FW022	G/A	C/C	C/C	C/C	G/C	T/T
1	FW024		20	1	48	1	0	161	1.61	60	0	FW024	FW024	G/G	C/C	C/C	C/T	G/G	T/T
1	FW025		21	2	52	0	0	158	1.58	68	1	FW025	FW025	G/G	C/C	C/T	C/C	G/G	C/T
1	FW028		22	1	46	0	0	168	1.68	64	0	FW028	FW028	G/G	C/C	C/C	C/C	G/G	T/T
1	FW029		23	2	69	0	0	156	1.56	54	0	FW029	FW029	G/G	C/C	C/T	C/C	G/G	C/T
1	FW030		24	1	67	1	0	164	1.64	54	0	FW030	FW030	G/G	C/C	C/T	C/C	G/G	C/T
1	FW031		25	1	68	1	0	162	1.62	65	1	FW031	FW031	?	?	?	?	?	?
1	FW032		26	1	61	1	0	163	1.63	57	0	FW032	FW032	G/G	C/C	C/T	C/C	G/G	C/T
1	FW034		27	1	67	1	1	168	1.68	57	0	FW034	FW034	G/G	C/C	C/C	C/C	G/G	C/T
1	FW035		28	2	44	0	0	163	1.63	49	0	FW035	FW035	G/G	C/C	C/C	C/T	G/G	T/T
1	FW036		29	1	78	1	0	157	1.57	57	0	FW036	FW036	G/G	C/C	C/T	C/C	G/G	C/T
1	FW037		30	2	29	0	0	158	1.58	45	0	FW037	FW037	G/A	C/C	C/C	C/T	G/C	C/T
1	FW038		31	1	70	1	1	158	1.58	48	0	FW038	FW038	G/G	G/C	C/C	C/C	G/G	T/T
1	FW039		32	1	84	0	0	161	1.61	61	0	FW039	FW039	G/A	C/C	C/C	C/T	G/C	C/C
1	FW041		33	2	61	0	0	160	1.6	55	0	FW041	FW041	G/G	C/C	C/T	C/T	G/G	C/T
1	FW043		34	1	65	0	0	168	1.68	75	1	FW043	FW043	G/G	C/C	C/T	C/T	G/G	C/C
1	FW044		35	2	66	0	0	170	1.7	62	0	FW044	FW044	G/G	C/C	C/C	C/T	G/G	T/T
1	FW047		36	1	75	1	1	164	1.64	56	0	FW047	FW047	G/G	C/C	C/C	C/T	G/G	C/C
1	FW048		37	1	64	0	0	170	1.7	63	0	FW048	FW048	G/G	C/C	C/C	C/C	G/G	T/T
1	FW049		38	2	64	0	0	165	1.65	54	0	FW049	FW049	G/G	C/C	C/T	C/T	G/G	C/T
1	FW051		39	1	76	0	0	165	1.65	60	0	FW051	FW051	G/G	C/C	C/C	C/C	G/G	C/T
1	FW053		40	1	55	1	1	172	1.72	72	1	FW053	FW053	G/G	C/C	C/C	C/T	G/G	C/T
1	FW054		41	1	57	1	1	160	1.6	62	1	FW054	FW054	G/G	C/C	C/C	C/C	G/G	C/T
1	FW055		42	1	50	0	0	168	1.68	68	1	FW055	FW055	G/G	C/C	C/C	C/T	G/G	C/C
1	FW056		43	1	70	0	0	150	1.5	47	0	FW056	FW056	G/G	C/C	C/C	C/C	G/G	C/C
1	FW057		44	2	54	0	0	165	1.65	52	0	FW057	FW057	G/G	C/C	C/C	C/C	G/G	C/T
1	FW058		45	1	49	0	0	176	1.76	90	1	FW058	FW058	G/G	C/C	C/C	C/C	G/G	T/T
1	FW060		46	2	53	0	0	155	1.55	50	0	FW060	FW060	G/G	G/C	C/T	C/T	G/G	C/C
1	FW061		47	1	72	0	0	165	1.65	67	1	FW061	FW061	G/G	C/C	T/T	C/C	G/G	C/C
1	FW062		48	2	64	0	0	150	1.5	44	0	FW062	FW062	G/G	C/C	C/T	C/C	G/G	C/C
1	FW063		49	1	57	1	1	170	1.7	65	0	FW063	FW063	G/G	C/C	C/T	C/C	G/G	C/C
1	FW064		50	2	52	0	0	160	1.6	66	1	FW064	FW064	G/G	C/C	C/T	C/C	G/G	C/T
1	FW065		51	2	69	0	0	155	1.55	66	1	FW065	FW065	G/G	C/C	C/C	C/T	G/G	C/T
1	FW066		52	2	71	0	0	156	1.56	45	0	FW066	FW066	G/G	C/C	C/T	C/C	G/G	C/T
1	FW067		53	1	78	0	0	166	1.66	72	1	FW067	FW067	G/G	C/C	C/C	C/T	G/G	C/C
1	FW068		54	2	51	0	0	160	1.6	55	0	FW068	FW068	G/G	G/C	C/C	C/T	G/G	C/T
1	FW069		55	2	33	0	0	162	1.62	52	0	FW069	FW069	G/G	C/C	T/T	C/C	G/G	C/C
1	FW070		56	1	64	1	0	169	1.69	57	0	FW070	FW070	G/G	C/C	C/C	C/C	G/G	T/T
1	FW071		57	1	51	0	0	161	1.61	53	0	FW071	FW071	G/G	C/C	C/T	C/T	G/G	C/T
1	FW072		58	1	78	1	0	170	1.7	80	1	FW072	FW072	G/G	C/C	C/T	C/T	G/G	C/C
1	FW073		59	1	79	1	0	160	1.6	55	0	FW073	FW073	G/G	C/C	C/C	C/T	G/G	C/T
1	FW074		60	2	77	0	0	161	1.61	65	1	FW074	FW074	G/A	C/C	T/T	C/C	G/C	C/C
1	FW075		61	1	38	1	0	170	1.7	85	1	FW075	FW075	G/A	C/C	T/T	C/C	G/C	C/C
1	FW077		62	2	54	0	0	158	1.58	48	0	FW077	FW077	G/G	C/C	C/T	C/C	G/G	C/C
1	FW078		63	2	44	0	0	155	1.55	48	0	FW078	FW078	G/G	C/C	C/C	C/T	G/G	C/T
1	FW079		64	1	72	0	0	176	1.76	79	1	FW079	FW079	G/G	C/C	C/C	C/C	G/G	C/T
1	FW080		65	1	82	0	1	160	1.6	61	0	FW080	FW080	G/G	C/C	C/C	C/T	G/G	C/C
1	FW082		66	2	69	0	0	155	1.55	57	0	FW082	FW082	G/G	C/C	C/C	C/T	G/G	T/T
1	FW083		67	2	44	0	0	153	1.53	46	0	FW083	FW083	G/G	C/C	C/T	C/C	G/G	C/C
1	FW084		68	1	59	1	1	173	1.73	67	0	FW084	FW084	G/G	G/C	C/C	C/T	G/G	C/T
1	FW085		69	2	78	0	0	160	1.6	55	0	FW085	FW085	G/G	C/C	T/T	C/T	G/G	C/C
1	FW086		70	1	57	1	1	178	1.78	100	1	FW086	FW086	G/A	C/C	C/C	C/C	G/C	C/T
1	FW087		71	2	45	0	0	165	1.65	60	0	FW087	FW087	G/G	C/C	C/T	C/C	G/G	C/T
1	FW089		72	1	50	1	1	185	1.85	80	0	FW089	FW089	G/G	C/C	C/C	C/T	G/G	C/T
1	FW090		73	1	57	0	0	162	1.62	62	0	FW090	FW090	G/G	C/C	C/T	C/C	G/G	C/T
1	FW091		74	1	65	1	1	170	1.7	60	0	FW091	FW091	G/G	C/C	C/C	C/T	G/G	C/C
1	FW092		75	2	51	0	0	157	1.57	64	1	FW092	FW092	G/A	C/C	C/C	T/T	G/C	C/C
1	FW093		76	1	67	1	1	170	1.7	70	1	FW093	FW093	G/G	G/C	C/T	T/T	G/G	C/C
1	FW094		77	2	67	0	0	156	1.56	51	0	FW094	FW094	G/G	C/C	C/T	T/T	G/G	C/C
1	FW095		78	1	50	1	1	170	1.7	60	0	FW095	FW095	G/G	C/C	C/T	T/T	G/G	C/C
1	FW099		79	1	64	1	0	165	1.65	54	0	FW099	FW099	G/G	C/C	C/C	C/C	G/G	C/T
1	FW100		80	1	54	1	0	162	1.62	53	0	FW100	FW100	G/G	C/C	C/C	C/C	G/G	C/T
1	FW101		81	1	42	0	1	162	1.62	56	0	FW101	FW101	G/A	C/C	C/C	C/C	G/C	C/C
1	FW102		82	1	75	1	1	168	1.68	54	0	FW102	FW102	G/G	G/C	C/C	C/C	G/G	C/C
1	FW103		83	1	72	1	1	153	1.53	48	0	FW103	FW103	G/G	G/C	C/C	C/T	G/G	C/T
1	FW104		84	2	56	0	0	155	1.55	49	0	FW104	FW104	G/A	C/C	C/T	C/T	G/C	C/C
1	FW105		85	1	50	1	1	165	1.65	63.5	0	FW105	FW105	G/A	G/C	C/C	C/T	G/C	T/T
1	FW106		86	1	66	1	1	170	1.7	55	0	FW106	FW106	G/G	C/C	C/C	C/T	G/G	C/C
1	FW107		87	1	42	0	1	173	1.73	69	0	FW107	FW107	G/G	C/C	C/T	T/T	G/G	C/C
1	FW109		88	1	41	0	1	175	1.75	55	0	FW109	FW109	G/G	G/C	C/T	C/T	G/G	C/C
1	FW110		89	1	50	1	1	159	1.59	43	0	FW110	FW110	G/G	C/C	C/C	C/T	G/G	C/T
1	FW113		90	1	60	0	0	168	1.68	55	0	FW113	FW113	G/G	C/C	C/C	C/C	G/G	C/T
1	FW116		91	1	66	1	1	167	1.67	61	0	FW116	FW116	G/G	C/C	C/C	C/T	G/G	C/T
1	FW118		92	2	31	0	0	157	1.57	60	1	FW118	FW118	G/A	C/C	C/T	C/C	G/C	C/C
1	FW119		93	1	73	0	0	159	1.59	50	0	FW119	FW119	G/G	G/C	C/C	C/C	G/G	C/C
1	FW121		94	1	42	1	0	156	1.56	51	0	FW121	FW121	G/G	C/C	C/C	C/C	G/G	C/T
1	FW122		95	1	50	1	0	165	1.65	64	0	FW122	FW122	G/G	G/C	C/T	C/C	G/G	C/T
1	FW123		96	2	29	0	0	161	1.61	50	0	FW123	FW123	G/G	C/C	C/C	C/T	G/G	T/T
1	FW124		97	2	41	0	0	156	1.56	43	0	FW124	FW124	G/G	C/C	C/C	T/T	G/G	T/T
1	FW125		98	2	49	0	0	155	1.55	86	1	FW125	FW125	G/G	C/C	C/C	C/C	G/G	C/C
1	FW126		99	2	42	0	0	165	1.65	60	0	FW126	FW126	G/G	C/C	C/T	C/T	G/G	C/C
1	FW128		100	1	54	1	1	171	1.71	60	0	FW128	FW128	G/G	C/C	C/C	C/C	G/G	C/T
1	FW129		101	2	53	0	0	150	1.5	54	1	FW129	FW129	G/G	C/C	C/C	C/T	G/G	C/T
1	FW130		102	1	62	1	1	176	1.76	74	0	FW130	FW130	G/G	C/C	C/T	C/C	G/G	C/C
1	FW131		103	2	44	0	0	159	1.59	56	0	FW131	FW131	G/G	C/C	C/T	C/C	G/G	C/C
1	FW132		104	2	61	1	0	150	1.5	58	1	FW132	FW132	G/G	C/C	C/C	C/C	G/G	C/C
1	FW134		105	1	74	1	0	170	1.7	57	0	FW134	FW134	G/G	C/C	C/C	C/C	G/G	T/T
1	FW135		106	1	59	0	0	163	1.63	54	0	FW135	FW135	G/G	C/C	C/C	C/T	G/G	C/T
1	FW136		107	2	34	0	0	152	1.52	42	0	FW136	FW136	G/G	C/C	C/T	C/C	G/G	C/T
1	FW138		108	1	62	0	0	172	1.72	69	0	FW138	FW138	G/G	C/C	C/C	C/T	G/G	C/C
1	FW139		109	1	60	1	0	167	1.67	70	1	FW139	FW139	G/G	C/C	C/C	C/T	G/G	C/T
1	FW140		110	1	80	1	1	160	1.6	59	0	FW140	FW140	G/G	C/C	C/C	C/T	G/G	C/T
1	FW141		111	2	74	0	0	156	1.56	65	1	FW141	FW141	G/G	C/C	C/C	C/C	G/G	C/T
1	FW142		112	1	53	1	0	165	1.65	60	0	FW142	FW142	G/G	C/C	C/T	C/T	G/G	C/C
1	FW143		113	1	67	0	1	175	1.75	68	0	FW143	FW143	G/G	C/C	C/C	C/T	G/G	C/T
1	FW144		114	2	42	0	0	160	1.6	52	0	FW144	FW144	G/G	C/C	C/C	C/C	G/G	C/T
1	FW146		115	1	67	1	1	170	1.7	50	0	FW146	FW146	G/G	C/C	T/T	T/T	G/G	C/C
1	FW147		116	2	58	0	0	156	1.56	49	0	FW147	FW147	G/G	C/C	C/C	C/C	G/G	C/C
1	FW149		117	2	48	0	0	150	1.5	45	0	FW149	FW149	G/G	C/C	T/T	C/C	G/G	C/C
1	FW150		118	1	61	1	0	170	1.7	60	0	FW150	FW150	G/G	C/C	C/T	C/C	G/G	C/T
1	FW152		119	1	64	0	0	165	1.65	70	1	FW152	FW153	G/A	C/C	C/T	C/C	G/C	C/T
1	FW154		120	1	75	1	1	170	1.7	55	0	FW154	FW154	G/G	C/C	C/T	C/C	G/G	C/T
1	FW155		121	1	63	0	0	175	1.75	80	1	FW155	FW155	G/A	C/C	C/C	C/C	G/C	T/T
1	FW157		122	1	61	0	1	173	1.73	72	1	FW157	FW157	G/G	C/C	T/T	C/T	G/G	C/C
1	FW158		123	2	56	0	0	143	1.43	43	0	FW158	FW158	G/G	C/C	C/C	C/T	G/G	T/T
1	FW160		124	1	62	1	1	160	1.6	62	1	FW160	FW160	G/G	C/C	C/C	C/C	G/G	T/T
1	FW161		125	2	68	0	0	152	1.52	49	0	FW161	FW161	G/G	C/C	C/C	C/C	G/G	T/T
1	FW162		126	1	74	0	0	170	1.7	70	1	FW162	FW162	G/G	C/C	C/C	C/C	G/G	C/T
1	FW163		127	2	70	0	0	163	1.63	50	0	FW163	FW163	G/G	C/C	C/C	C/T	G/G	T/T
1	FW165		128	1	58	1	1	165	1.65	65	0	FW165	FW165	G/G	C/C	C/C	C/T	G/G	C/T
1	FW167		129	2	54	0	0	160	1.6	67	1	FW167	FW167	G/G	C/C	C/T	C/C	G/G	C/C
1	FW168		130	1	62	0	0	163	1.63	57	0	FW168	FW168	G/G	C/C	T/T	C/C	G/G	C/C
1	FW169		131	1	74	1	0	162	1.62	52	0	FW169	FW169	G/G	C/C	C/T	C/C	G/G	C/C
1	FW172		132	2	35	0	0	156	1.56	44	0	FW172	FW172	G/G	G/C	C/C	C/T	G/G	T/T
1	FW173		133	1	63	1	1	170	1.7	70	1	FW173	FW173	G/G	C/C	C/T	C/C	G/G	C/T
1	FW174		134	2	61	0	0	157	1.57	45	0	FW174	FW174	G/G	C/C	C/C	C/C	G/G	C/T
1	FW176		135	1	53	1	1	173	1.73	68	0	FW176	FW176	G/G	C/C	C/C	C/T	G/G	C/T
1	FW177		136	1	70	0	1	168	1.68	54	0	FW177	FW177	G/G	C/C	C/C	C/T	G/G	C/C
1	FW178		137	1	48	0	1	182	1.82	85	1	FW178	FW178	G/G	C/C	C/C	T/T	G/G	T/T
1	FW179		138	2	69	0	0	161	1.61	55	0	FW179	FW179	G/G	C/C	C/T	C/T	G/G	C/C
1	FW180		139	1	65	1	0	161	1.61	56	0	FW180	FW180	G/G	C/C	C/C	T/T	G/G	C/T
1	FW181		140	2	61	0	0	157	1.57	54	0	FW181	FW181	G/G	C/C	C/C	C/C	G/G	T/T
1	FW183		141	1	61	0	0	165	1.65	46	0	FW183	FW183	G/G	C/C	C/T	C/C	G/G	C/T
1	FW185		142	2	73	0	0	148	1.48	61	1	FW185	FW185	G/G	C/C	C/T	C/C	G/G	C/T
1	FW187		143	1	52	1	0	155	1.55	53	0	FW187	FW187	G/G	C/C	C/T	C/C	G/G	C/T
1	FW188		144	1	64	0	1	160	1.6	59	0	FW188	FW188	G/G	C/C	C/C	C/T	G/G	C/T
1	FW189		145	1	60	1	0	175	1.75	67	0	FW189	FW189	G/G	C/C	C/T	C/C	G/G	C/C
1	FW190		146	1	55	1	1	169	1.69	70	1	FW190	FW190	G/G	C/C	C/C	C/C	G/G	C/T
1	FW191		147	1	70	1	0	178	1.78	62	0	FW191	FW191	G/G	C/C	C/C	C/C	G/G	C/C
1	FW192		148	1	84	1	1	162	1.62	78	1	FW192	FW192	G/G	G/C	C/C	C/T	G/G	T/T
1	FW193		149	1	64	1	0	168	1.68	69	1	FW193	FW193	G/G	C/C	C/C	C/T	G/G	T/T
1	FW194		150	2	71	0	0	168	1.68	60	0	FW194	FW194	G/G	C/C	C/C	T/T	G/G	C/C
1	FW195		151	1	67	1	0	163	1.63	69	1	FW195	FW195	G/G	C/C	T/T	C/T	G/G	C/C
1	FW196		152	1	51	1	0	170	1.7	53	0	FW196	FW196	G/G	C/C	C/C	C/C	G/G	C/T
1	FW197		153	1	53	1	0	165	1.65	60	0	FW197	FW197	G/G	C/C	C/C	C/T	G/G	C/T
1	FW198		154	1	64	1	1	160	1.6	61	0	FW198	FW198	G/G	C/C	C/C	C/C	G/G	C/T
1	FW199		155	1	54	0	0	162	1.62	58	0	FW199	FW199	G/G	C/C	C/C	C/T	G/G	T/T
1	FW200		156	1	56	1	1	160	1.6	56	0	FW200	FW200	G/G	C/C	T/T	C/C	G/G	C/C
1	FW201		157	2	63	0	0	159	1.59	71	1	FW201	FW201	G/G	C/C	C/C	C/T	G/G	C/T
1	FW202		158	1	51	1	1	170	1.7	52	0	FW202	FW202	G/G	C/C	C/C	C/C	G/G	C/C
1	FW203		159	1	53	0	1	163	1.63	71	1	FW203	FW203	G/G	C/C	C/T	C/C	G/G	C/T
1	FW204		160	2	51	0	0	162	1.62	61	0	FW204	FW204	G/G	C/C	C/T	C/C	G/G	C/T
1	FW207		161	1	63	1	1	165	1.65	63.5	0	FW207	FW207	G/G	C/C	C/C	C/C	G/G	T/T
1	FW208		162	1	53	1	1	176	1.76	69	0	FW208	FW208	G/G	C/C	C/C	C/T	G/G	T/T
1	FW209		163	1	56	0	0	173	1.73	59	0	FW209	FW209	G/A	C/C	C/C	C/C	G/C	C/T
1	FW210		164	1	69	1	1	176	1.76	74	0	FW210	FW210	G/G	C/C	C/T	C/T	G/G	C/C
1	FW212		165	1	76	1	1	165	1.65	62	0	FW212	FW212	G/G	C/C	C/C	C/T	G/G	T/T
1	FW213		166	1	62	1	0	175	1.75	73	0	FW213	FW213	G/G	C/C	T/T	C/C	G/G	C/C
1	FW215		167	2	61	0	0	155	1.55	36	0	FW215	FW215	G/G	C/C	C/C	C/C	G/G	C/C
1	FW216		168	1	67	0	1	158	1.58	50	0	FW216	FW216	G/G	C/C	C/C	C/C	G/G	C/C
1	FW218		169	2	64	0	0	167	1.67	52	0	FW218	FW218	G/G	C/C	C/C	C/C	G/G	C/C
1	FW219		170	1	73	0	1	172	1.72	60	0	FW219	FW219	G/G	C/C	C/T	T/T	G/G	C/T
1	FW220		171	2	82	0	0	139	1.39	42	0	FW220	FW220	G/G	C/C	C/T	C/T	G/G	C/T
1	FW221		172	2	47	0	0	145	1.45	39	0	FW221	FW221	G/A	C/C	C/T	C/T	G/C	C/C
1	FW222		173	2	48	0	0	155	1.55	55	0	FW222	FW222	G/A	C/C	C/T	T/T	G/C	C/T
1	FW223		174	1	49	1	1	168	1.68	62	0	FW223	FW223	G/G	C/C	T/T	C/C	G/G	C/C
1	FW224		175	2	40	0	0	158	1.58	42	0	FW224	FW224	G/G	C/C	C/C	C/C	G/G	T/T
1	FW225		176	2	77	0	0	158	1.58	49	0	FW225	FW225	G/G	C/C	C/C	C/T	G/G	C/T
1	FW226		177	1	54	1	0	165	1.65	75	1	FW226	FW226	G/A	C/C	C/C	C/C	G/C	C/C
1	FW227		178	1	71	0	0	170	1.7	53	0	FW227	FW227	G/G	C/C	C/C	C/T	G/G	T/T
1	FW228		179	1	76	1	1	176	1.76	69	0	FW228	FW228	G/G	C/C	C/T	C/T	G/G	C/C
1	FW229		180	1	59	1	0	165	1.65	49	0	FW229	FW229	G/G	C/C	C/T	C/T	G/G	C/C
1	FW230		181	1	72	0	0	170	1.7	58	0	FW230	FW230	G/G	C/C	C/T	C/C	G/G	C/T
1	FW231		182	2	73	0	0	162	1.62	75	1	FW231	FW231	G/A	C/C	C/C	C/C	G/C	T/T
1	FW232		183	2	30	0	0	160	1.6	48	0	FW232	FW232	G/G	C/C	C/C	C/C	G/G	C/C
1	FW235		184	1	64	1	1	163	1.63	53	0	FW235	FW235	G/G	C/C	C/C	C/C	G/G	C/C
1	FW236		185	2	81	0	0	150	1.5	53	0	FW236	FW236	G/G	C/C	C/T	C/T	G/G	C/T
1	FW240		186	1	63	1	0	180	1.8	82	1	FW240	FW240	G/G	C/C	C/C	C/T	G/G	C/T
1	FW242		187	1	69	1	1	162	1.62	72	1	FW242	FW242	G/G	C/C	C/C	C/C	G/G	T/T
1	FW245		188	1	78	1	1	172	1.72	65	0	FW245	FW245	G/G	C/C	C/T	C/T	G/G	C/C
1	FW246		189	2	78	0	0	152	1.52	48	0	FW246	FW246	G/G	C/C	C/C	C/T	G/G	C/T
1	FW247		190	1	67	1	0	171	1.71	65	0	FW247	FW247	G/G	C/C	C/C	C/C	G/G	T/T
1	FW248		191	1	53	1	1	164	1.64	50	0	FW248	FW248	G/G	C/C	C/C	C/C	G/G	C/C
1	FW249		192	1	58	1	0	180	1.8	66	0	FW249	FW249	G/G	C/C	C/C	C/C	G/G	T/T
1	FW250		193	1	69	0	0	165	1.65	63.5	0	FW250	FW250	G/G	C/C	C/C	C/T	G/G	C/T
1	FW251		194	1	72	1	0	165	1.65	60	0	FW251	FW251	G/G	C/C	C/C	C/T	G/G	C/T
1	FW253		195	1	70	1	1	173	1.73	50	0	FW253	FW253	G/G	C/C	C/C	C/C	G/G	T/T
1	FW257		196	2	56	0	0	164	1.64	64	0	FW257	FW257	G/G	C/C	C/T	C/C	G/G	C/C
1	FW258		197	1	69	1	1	177	1.77	55	0	FW258	FW258	G/G	C/C	C/C	C/C	G/G	C/C
1	FW259		198	1	79	0	0	170	1.7	56	0	FW259	FW259	G/G	C/C	C/C	C/C	G/G	T/T
1	FW260		199	2	57	0	0	160	1.6	60	0	FW260	FW260	G/G	C/C	C/T	C/C	G/G	C/C
1	FW261		200	1	56	0	0	175	1.75	69	0	FW261	FW261	G/G	G/C	C/C	C/T	G/G	C/T
1	FW263		201	1	53	1	1	170	1.7	70	1	FW263	FW263	G/G	C/C	C/C	C/C	G/G	T/T
1	FW265		202	1	57	1	0	161	1.61	62	0	FW265	FW265	G/G	C/C	C/C	C/C	G/G	T/T
1	FW266		203	1	62	0	0	168	1.68	81	1	FW266	FW266	G/G	C/C	C/C	C/C	G/G	C/T
1	FW268		204	1	67	0	0	163	1.63	52	0	FW268	FW268	G/G	C/C	C/C	C/T	G/G	T/T
1	FW269		205	2	71	0	0	163	1.63	57	0	FW269	FW269	G/G	C/C	C/C	C/T	G/G	C/C
1	FW270		206	1	66	1	1	175	1.75	57	0	FW270	FW270	G/A	C/C	C/C	C/C	G/C	T/T
1	FW271		207	1	46	1	1	178	1.78	62	0	FW271	FW271	G/G	C/C	C/T	C/T	G/G	C/T
1	FW272		208	2	51	0	0	163	1.63	53	0	FW272	FW272	G/G	C/C	C/T	C/C	G/G	C/C
1	FW273		209	1	75	0	0	166	1.66	60	0	FW273	FW273	G/G	C/C	C/C	C/T	G/G	C/T
1	FW274		210	2	49	0	0	158	1.58	60	1	FW274	FW274	G/G	C/C	C/C	C/C	G/G	C/T
1	FW275		211	2	61	0	0	148	1.48	52	0	FW275	FW275	G/G	C/C	C/C	C/C	G/G	C/T
1	FW277		212	1	66	1	1	165	1.65	54	0	FW277	FW277	G/G	C/C	C/C	C/T	G/G	T/T
1	FW279		213	2	82	0	0	157	1.57	47	0	FW279	FW279	G/G	C/C	C/C	C/C	G/G	C/T
1	FW280		214	1	69	1	0	170	1.7	93	1	FW280	FW280	G/G	C/C	C/C	C/C	G/G	C/T
1	FW281		215	1	58	1	0	172	1.72	72	1	FW281	FW281	G/G	C/C	C/C	C/T	G/G	C/T
1	FW282		216	1	69	1	0	173	1.73	70	0	FW282	FW282	G/A	C/C	C/T	C/T	G/C	C/T
1	FW283		217	1	71	0	0	166	1.66	80	1	FW283	FW283	G/G	C/C	C/C	T/T	G/G	C/T
1	FW284		218	1	72	0	0	168	1.68	56	0	FW284	FW284	G/G	C/C	C/C	C/C	G/G	T/T
1	FW287		219	2	78	0	0	155	1.55	70	1	FW287	FW287	G/G	C/C	C/T	C/C	G/G	C/T
1	FW288		220	2	56	0	0	156	1.56	41	0	FW288	FW288	G/G	C/C	C/T	C/T	G/G	C/C
1	FW289		221	1	59	1	1	162	1.62	75	1	FW289	FW289	G/G	C/C	C/C	C/T	G/G	C/T
1	FW290		222	1	60	0	0	164	1.64	37	0	FW290	FW290	G/G	C/C	C/C	C/C	G/G	T/T
1	FW291		223	1	50	0	0	158	1.58	55	0	FW291	FW291	G/G	C/C	C/T	C/T	G/G	C/C
1	FW292		224	1	60	1	1	172	1.72	65	0	FW292	FW292	G/G	C/C	C/T	C/C	G/G	C/C
1	FW293		225	2	55	0	0	154	1.54	49	0	FW293	FW293	G/G	C/C	C/T	C/C	G/G	C/C
1	FW294		226	1	47	1	0	171	1.71	72	1	FW294	FW294	G/G	C/C	C/T	C/C	G/G	C/C
1	FW296		227	2	47	0	0	163	1.63	58	0	FW296	FW296	G/G	C/C	C/C	C/C	G/G	C/T
1	FW297		228	1	48	1	0	171	1.71	61	0	FW297	FW297	G/G	C/C	C/C	C/C	G/G	C/T
1	FW298		229	2	33	0	0	153	1.53	45	0	FW298	FW298	G/G	C/C	C/T	C/T	G/G	C/T
1	FW299		230	1	42	1	1	169	1.69	56	0	FW299	FW299	G/G	C/C	C/C	C/T	G/G	C/T
1	FW300		231	1	79	0	0	162	1.62	52	0	FW300	FW300	G/G	C/C	C/C	C/T	G/G	C/C
1	FW301		232	1	58	1	1	168	1.68	62	0	FW301	FW301	G/G	C/C	C/C	C/T	G/G	C/T
1	FW302		233	2	63	0	0	157	1.57	47	0	FW302	FW302	G/G	C/C	C/C	C/C	G/G	C/T
1	FW303		234	1	50	0	0	173	1.73	64	0	FW303	FW303	G/G	C/C	C/T	C/C	G/G	C/C
1	FW304		235	2	33	0	0	150	1.5	42	0	FW304	FW304	G/G	C/C	C/C	C/C	G/G	C/C
1	FW305		236	1	60	0	0	162	1.62	65	1	FW305	FW305	G/A	C/C	C/T	C/T	G/C	C/C
1	FW306		237	1	70	0	0	164	1.64	64	0	FW306	FW306	G/G	C/C	C/C	C/C	G/G	C/C
1	FW308		238	1	56	1	1	170	1.7	62	0	FW308	FW308	G/G	C/C	C/T	C/C	G/G	C/T
1	FW310		239	1	61	1	1	174	1.74	54	0	FW310	FW310	G/G	C/C	C/C	C/C	G/G	C/T
1	FW311		240	1	70	1	1	165	1.65	65	0	FW311	FW311	G/G	C/C	C/T	C/C	G/G	C/C
1	FW312		241	1	40	1	0	160	1.6	47	0	FW312	FW312	G/A	C/C	C/C	C/C	G/C	C/T
1	FW313		242	2	64	0	0	158	1.58	41	0	FW313	FW313	G/G	C/C	C/C	C/C	G/G	T/T
1	FW314		243	2	71	0	0	161	1.61	68	1	FW314	FW314	G/A	C/C	C/C	C/T	G/C	C/T
1	FW315		244	1	62	0	0	172	1.72	84	1	FW315	FW315	G/G	C/C	C/C	C/C	G/G	C/T
1	FW317		245	2	35	0	0	156	1.56	53	0	FW317	FW317	G/G	C/C	C/C	C/C	G/G	C/T
1	FW318		246	2	79	0	0	160	1.6	55	0	FW318	FW318	G/G	C/C	C/C	C/T	G/G	T/T
1	FW319		247	1	70	1	0	170	1.7	61	0	FW319	FW319	G/G	C/C	C/C	C/C	G/G	C/C
1	FW320		248	1	51	1	1	163	1.63	49	0	FW320	FW320	G/G	C/C	C/T	C/C	G/G	C/T
1	FW321		249	1	60	0	0	166	1.66	60	0	FW321	FW321	G/G	C/C	C/C	C/C	G/G	C/C
1	FW322		250	1	72	0	0	172	1.72	65	0	FW322	FW322	G/G	C/C	C/T	C/C	G/G	C/C
1	FW323		251	1	58	0	0	162	1.62	66	1	FW323	FW323	G/G	C/C	C/T	C/C	G/G	C/C
1	FW324		252	1	61	0	1	176	1.76	72	0	FW324	FW324	G/G	G/C	C/T	C/T	G/G	C/T
1	FW325		253	2	65	0	0	160	1.6	65	1	FW325	FW325	G/G	C/C	C/C	C/T	G/G	C/T
1	FW326		254	1	69	1	0	176	1.76	59	0	FW326	FW326	G/G	C/C	C/T	C/C	G/G	C/C
1	FW327		255	2	74	0	0	150	1.5	52	0	FW327	FW327	G/G	C/C	C/C	C/T	G/G	C/T
1	FW328		256	2	51	0	0	157	1.57	45	0	FW328	FW328	G/G	C/C	C/C	C/C	G/G	C/T
1	FW329		257	1	76	0	0	160	1.6	68	1	FW329	FW329	G/G	C/C	C/C	C/C	G/G	C/T
1	FW330		258	1	58	1	0	161	1.61	56	0	FW330	FW330	G/G	C/C	C/T	C/C	G/G	C/T
1	FW331		259	1	68	0	0	165	1.65	63.5	0	FW331	FW331	?	?	?	?	?	?
1	FW332		260	1	58	1	0	172	1.72	74	1	FW332	FW332	G/G	G/C	C/C	C/T	G/G	T/T
1	FW333		261	1	56	0	0	165	1.65	63.5	0	FW333	FW333	G/G	C/C	C/C	C/C	G/G	C/T
1	FW334		262	1	52	1	1	175	1.75	59	0	FW334	FW334	G/G	C/C	C/T	C/T	G/G	C/T
1	FW336		263	2	46	0	0	155	1.55	52	0	FW336	FW336	G/G	C/C	C/T	C/C	G/G	C/T
1	FW337		264	1	69	0	0	165	1.65	40	0	FW337	FW337	G/G	C/C	C/T	C/T	G/G	C/T
1	FW338		265	1	55	1	1	185	1.85	63	0	FW338	FW338	G/G	C/C	C/T	C/C	G/G	C/T
1	FW339		266	1	51	1	0	175	1.75	50	0	FW339	FW339	G/G	C/C	C/C	C/T	G/G	C/C
1	FW340		267	1	42	0	0	178	1.78	78	1	FW340	FW340	G/G	C/C	T/T	C/C	G/G	C/C
1	FW342		268	2	51	0	0	156	1.56	48	0	FW342	FW342	G/G	C/C	C/C	C/C	G/G	C/C
1	FW343		269	1	69	0	0	170	1.7	75	1	FW343	FW343	G/A	C/C	C/C	C/T	G/C	C/T
1	FW344		270	1	57	1	1	165	1.65	57	0	FW344	FW344	G/G	C/C	C/T	C/C	G/G	C/T
1	FW345		271	1	61	0	0	168	1.68	58	0	FW345	FW345	G/G	C/C	C/C	C/C	G/G	C/C
1	FW346		272	2	46	0	0	165	1.65	60	0	FW346	FW346	G/G	C/C	C/C	C/C	G/G	C/C
1	FW347		273	1	58	1	1	170	1.7	60	0	FW347	FW347	G/G	C/C	C/C	C/T	G/G	C/C
1	FW349		274	1	56	1	0	160	1.6	60	0	FW349	FW349	G/G	C/C	C/C	C/T	G/G	C/C
1	FW350		275	1	53	1	0	170	1.7	55	0	FW350	FW350	G/G	C/C	C/C	C/T	G/G	T/T
1	FW351		276	1	64	0	0	173	1.73	75	1	FW351	FW351	G/G	C/C	C/C	C/T	G/G	C/T
1	FW352		277	1	83	0	0	170	1.7	60	0	FW352	FW352	G/G	C/C	C/T	C/T	G/G	C/C
1	FW353		278	1	68	1	0	175	1.75	70	0	FW353	FW353	G/G	G/C	C/C	C/T	G/G	C/C
1	FW355		279	1	54	1	1	170	1.7	65	0	FW355	FW355	G/G	C/C	C/T	C/C	G/G	C/T
1	FW356		280	2	45	0	0	160	1.6	82	1	FW356	FW356	G/G	C/C	C/C	C/C	G/G	T/T
1	FW357		281	1	62	1	0	171	1.71	64	0	FW357	FW357	G/G	C/C	C/T	C/T	G/G	C/T
1	FW358		282	1	64	1	0	150	1.5	52	0	FW358	FW358	G/G	C/C	C/T	C/C	G/G	C/T
1	FW359		283	1	63	0	0	168	1.68	80	1	FW359	FW359	G/G	C/C	T/T	C/T	G/G	C/C
1	FW360		284	2	46	0	0	160	1.6	50	0	FW360	FW360	G/A	C/C	C/C	C/T	G/C	T/T
1	FW361		285	1	37	0	0	160	1.6	58	0	FW361	FW361	G/G	C/C	C/C	C/T	G/G	T/T
1	FW362		286	2	38	0	0	161	1.61	59	0	FW362	FW362	G/G	C/C	C/C	C/T	G/G	C/T
1	FW363		287	1	60	1	1	171	1.71	83	1	FW363	FW363	G/G	C/C	T/T	C/T	G/G	C/C
1	FW364		288	1	64	0	0	164	1.64	60	0	FW364	FW364	G/G	C/C	C/C	C/C	G/G	C/T
1	FW365		289	1	54	1	0	176	1.76	71	0	FW365	FW365	G/G	C/C	C/T	C/C	G/G	C/T
1	FW366		290	2	40	0	0	165	1.65	57	0	FW366	FW366	G/G	C/C	C/T	C/C	G/G	C/C
1	FW367		291	2	52	0	0	159	1.59	58	0	FW367	FW367	G/G	C/C	C/C	C/C	G/G	C/T
1	FW368		292	2	57	0	0	160	1.6	50	0	FW368	FW368	G/G	C/C	C/T	C/T	G/G	C/C
1	FW369		293	1	56	1	1	172	1.72	68	0	FW369	FW369	G/G	C/C	C/C	C/C	G/G	C/T
1	FW373		294	2	62	0	0	170	1.7	66	0	FW373	FW373	G/G	C/C	C/C	C/C	G/G	C/T
1	FW375		295	1	61	0	0	167	1.67	54	0	FW375	FW375	G/G	C/C	C/C	C/C	G/G	T/T
1	FW376		296	1	52	1	0	170	1.7	73	1	FW376	FW376	G/G	C/C	C/T	C/C	G/G	C/C
1	FW377		297	1	41	1	0	175	1.75	62	0	FW377	FW377	G/G	C/C	C/C	C/C	G/G	C/C
1	FW378		298	1	68	0	0	167	1.67	53	0	FW378	FW378	G/G	C/C	C/T	C/C	G/G	C/C
1	FW380		299	2	65	0	0	158	1.58	62	1	FW380	FW380	G/G	C/C	C/C	C/T	G/G	C/T
1	FW381		300	1	50	0	0	170	1.7	78	1	FW381	FW381	G/G	C/C	C/C	C/T	G/G	C/C
1	FW382		301	1	64	1	0	168	1.68	70	1	FW382	FW382	G/G	C/C	C/T	C/C	G/G	C/T
1	FW383		302	1	56	1	1	166	1.66	66	0	FW383	FW383	G/A	C/C	C/T	C/C	G/C	C/C
1	FW384		303	2	52	0	0	155	1.55	56	0	FW384	FW384	G/G	C/C	T/T	C/T	G/G	C/C
1	FW385		304	1	68	1	0	173	1.73	66	0	FW385	FW385	G/G	G/C	C/T	C/T	G/G	C/T
1	FW386		305	1	63	0	0	170	1.7	68	0	FW386	FW386	G/G	C/C	C/T	C/C	G/G	C/C
1	FW387		306	2	48	0	0	159	1.59	50	0	FW387	FW387	G/G	G/C	C/C	C/T	G/G	C/T
1	FW388		307	2	29	0	0	160	1.6	45	0	FW388	FW388	G/G	C/C	C/C	C/C	G/G	C/T
1	FW389		308	2	66	0	0	155	1.55	52	0	FW389	FW389	G/G	C/C	C/C	C/T	G/G	C/C
1	FW390		309	1	53	1	1	178	1.78	89	1	FW390	FW390	G/A	C/C	C/C	C/C	G/C	C/C
1	FW392		310	1	64	0	0	168	1.68	70	1	FW392	FW392	G/G	C/C	C/T	C/C	G/G	C/T
1	FW395		311	1	72	1	1	167	1.67	60	0	FW395	FW395	G/G	C/C	C/T	C/C	G/G	C/T
1	FW396		312	2	63	0	0	155	1.55	68	1	FW396	FW396	G/G	C/C	C/C	C/C	G/G	T/T
1	FW398		313	2	54	0	0	148	1.48	57	1	FW398	FW398	G/A	C/C	C/T	T/T	G/C	C/C
1	FW400		314	1	45	0	0	165	1.65	62	0	FW400	FW400	G/G	C/C	C/T	C/C	G/G	C/T
1	FW401		315	1	58	0	0	165	1.65	65	0	FW401	FW401	G/G	C/C	C/C	C/C	G/G	C/T
1	FW403		316	2	27	0	0	157	1.57	46	0	FW403	FW403	G/G	C/C	C/T	C/T	G/G	C/T
1	FW404		317	1	66	0	0	172	1.72	56	0	FW404	FW404	G/G	C/C	C/T	C/T	G/G	C/C
1	FW405		318	1	49	0	0	160	1.6	58	0	FW405	FW405	A/A	C/C	C/T	C/C	C/C	C/C
1	FW406		319	1	47	1	1	163	1.63	60	0	FW406	FW406	G/G	C/C	C/T	T/T	G/G	C/C
1	FW407		320	2	51	0	0	152	1.52	55	0	FW407	FW407	G/G	C/C	C/C	C/C	G/G	T/T
1	FW408		321	2	67	0	0	165	1.65	60	0	FW408	FW408	G/A	C/C	C/T	C/C	G/C	C/C
1	FW409		322	2	44	0	0	152	1.52	45	0	FW409	FW409	G/G	C/C	C/C	C/C	G/G	C/T
1	FW410		323	1	70	1	1	170	1.7	57	0	FW410	FW410	G/G	C/C	C/T	C/C	G/G	C/C
1	FW413		324	1	72	1	0	160	1.6	55	0	FW413	FW413	G/A	C/C	C/T	C/C	G/C	C/C
1	FW415		325	1	58	1	0	157	1.57	53	0	FW415	FW415	G/G	C/C	C/C	C/T	G/G	C/T
1	FW416		326	1	49	1	0	168	1.68	62	0	FW416	FW416	G/G	C/C	C/C	C/C	G/G	T/T
1	FW418		327	1	70	0	0	170	1.7	70	1	FW418	FW418	G/G	C/C	C/C	C/T	G/G	C/T
1	FW420		328	1	64	0	1	174	1.74	72	0	FW420	FW420	G/G	C/C	C/C	C/T	G/G	C/C
1	FW421		329	2	52	0	0	152	1.52	70	1	FW421	FW421	G/G	C/C	C/C	C/T	G/G	T/T
1	FW422		330	1	68	0	1	170	1.7	71	1	FW422	FW422	G/A	C/C	C/T	C/C	G/C	C/T
1	FW423		331	1	60	1	1	160	1.6	54	0	FW423	FW423	G/G	C/C	C/T	C/C	G/G	C/C
1	FW424		332	1	52	1	0	170	1.7	70	1	FW424	FW424	G/G	C/C	C/C	C/C	G/G	T/T
1	FW425		333	2	69	0	0	155	1.55	64	1	FW425	FW425	G/A	C/C	C/T	C/T	G/C	C/T
1	FW427		334	2	67	0	0	157	1.57	53	0	FW427	FW427	G/G	C/C	C/C	C/T	G/G	C/T
1	FW428		335	1	72	1	0	155	1.55	58	1	FW428	FW428	G/G	C/C	C/T	C/C	G/G	C/C
1	FW429		336	1	69	1	0	167	1.67	66	0	FW429	FW429	G/G	C/C	C/C	C/T	G/G	C/T
1	FW431		337	1	62	0	0	171	1.71	72	1	FW431	FW431	G/G	C/C	C/T	C/C	G/G	C/C
1	FW432		338	1	66	0	1	168	1.68	72	1	FW432	FW432	G/G	C/C	C/C	C/T	G/G	C/T
1	FW433		339	2	49	1	0	169	1.69	64	0	FW433	FW433	G/G	C/C	C/C	C/C	G/G	C/T
1	FW434		340	1	71	0	0	167	1.67	56	0	FW434	FW434	G/G	G/C	C/T	C/T	G/G	C/T
1	FW438		341	1	38	1	1	172	1.72	88	1	FW438	FW438	G/G	G/C	C/C	C/C	G/G	C/T
1	FW439		342	2	54	0	0	150	1.5	48	0	FW439	FW439	G/G	C/C	C/C	C/C	G/G	C/T
1	FW440		343	2	74	0	0	160	1.6	49	0	FW440	FW440	G/G	C/C	C/C	C/T	G/G	C/T
1	FW441		344	1	71	0	0	169	1.69	70	1	FW441	FW441	G/A	C/C	C/T	C/C	G/C	C/T
1	FW443		345	1	57	0	0	172	1.72	65	0	FW443	FW443	G/G	C/C	C/T	C/C	G/G	C/C
1	FW445		346	1	59	0	0	171	1.71	60	0	FW445	FW445	G/G	C/C	C/T	C/T	G/G	C/C
1	FW446		347	1	69	1	1	170	1.7	65	0	FW446	FW446	G/A	C/C	C/C	C/T	G/C	T/T
1	FW447		348	2	52	0	0	164	1.64	60	0	FW447	FW447	G/G	C/C	C/C	C/T	G/G	C/T
1	FW448		349	2	49	0	0	151	1.51	46	0	FW448	FW448	G/G	C/C	C/T	C/T	G/G	C/T
1	FW449		350	1	34	1	0	165	1.65	63	0	FW449	FW449	G/G	C/C	C/C	C/T	G/G	C/C
1	FW450		351	1	61	1	1	175	1.75	80	1	FW450	FW450	G/A	C/C	C/C	C/C	G/C	C/T
1	FW451		352	2	66	0	0	150	1.5	50	0	FW451	FW451	G/G	C/C	C/T	C/T	G/G	C/T
1	FW452		353	1	59	0	0	155	1.55	52	0	FW452	FW452	G/G	C/C	C/C	C/C	G/G	C/T
1	FW453		354	1	73	1	1	165	1.65	77	1	FW453	FW453	G/G	C/C	C/C	C/C	G/G	C/C
1	FW454		355	1	48	0	0	168	1.68	72	1	FW454	FW454	G/A	C/C	C/C	C/C	G/C	T/T
1	FW455		356	1	67	1	1	168	1.68	82	1	FW455	FW455	G/G	C/C	C/C	C/C	G/G	C/T
1	FW456		357	1	59	0	1	170	1.7	55	0	FW456	FW456	G/G	C/C	C/C	C/C	G/G	T/T
1	FW457		358	2	76	0	0	150	1.5	55	1	FW457	FW457	G/G	C/C	C/T	C/T	G/G	C/T
1	FW458		359	1	72	0	0	166	1.66	69	1	FW458	FW458	G/G	C/C	C/C	C/C	G/G	C/C
1	FW459		360	1	64	1	1	177	1.77	67	0	FW459	FW459	G/A	C/C	C/T	C/C	G/C	C/T
1	FW460		361	1	69	1	1	160	1.6	57	0	FW460	FW460	G/G	C/C	C/T	C/C	G/G	C/C
1	FW461		362	2	65	0	0	155	1.55	54	0	FW461	FW461	G/G	C/C	C/C	T/T	G/G	T/T
1	FW462		363	1	64	0	0	162	1.62	59	0	FW462	FW462	G/G	C/C	C/T	C/C	G/G	C/C
1	FW463		364	1	70	1	0	168	1.68	59	0	FW463	FW463	G/G	C/C	C/C	C/C	G/G	C/C
1	FW464		365	1	77	1	0	170	1.7	50	0	FW464	FW464	G/G	C/C	C/C	C/C	G/G	C/T
1	FW465		366	1	63	1	1	163	1.63	60	0	FW465	FW465	G/G	C/C	C/C	C/C	G/G	C/T
1	FW466		367	1	60	1	0	165	1.65	63.5	0	FW466	FW466	G/G	C/C	C/C	C/T	G/G	T/T
1	FW468		368	2	43	0	0	162	1.62	43	0	FW468	FW468	G/G	C/C	C/C	C/C	G/G	T/T
1	FW469		369	1	68	0	0	170	1.7	55	0	FW469	FW469	G/G	C/C	C/C	C/T	G/G	C/C
1	FW470		370	2	71	0	0	158	1.58	53	0	FW470	FW470	G/G	C/C	C/C	C/C	G/G	C/T
1	FW471		371	1	45	1	1	168	1.68	58	0	FW471	FW471	G/G	C/C	C/C	C/C	G/G	C/T
1	FW472		372	1	56	1	1	160	1.6	58	0	FW472	FW472	G/G	C/C	C/T	C/C	G/G	C/T
1	FW473		373	2	42	0	0	164	1.64	58	0	FW473	FW473	G/A	C/C	C/T	C/T	G/C	C/T
1	FW474		374	1	59	0	0	177	1.77	68	0	FW474	FW474	G/G	C/C	C/C	C/C	G/G	C/T
1	FW475		375	1	61	1	0	175	1.75	75	1	FW475	FW475	G/G	C/C	C/C	C/C	G/G	T/T
1	FW476		376	1	45	1	1	177	1.77	83	1	FW476	FW476	G/G	C/C	C/C	C/T	G/G	C/C
1	FW477		377	1	63	0	0	160	1.6	54	0	FW477	FW477	G/G	C/C	C/T	C/C	G/G	C/T
1	FW478		378	1	62	1	0	162	1.62	51	0	FW478	FW478	G/G	C/C	C/C	C/T	G/G	C/T
1	FW479		379	2	66	0	0	163	1.63	70	1	FW479	FW479	G/G	C/C	C/C	C/C	G/G	T/T
1	FW480		380	1	61	1	0	163	1.63	53	0	FW480	FW480	G/G	C/C	C/C	C/C	G/G	C/C
1	FW481		381	1	65	1	1	158	1.58	47	0	FW481	FW481	G/G	C/C	C/C	C/C	G/G	C/T
1	FW482		382	1	59	1	1	170	1.7	60	0	FW482	FW482	G/G	C/C	C/C	C/C	G/G	T/T
1	FW483		383	1	49	0	1	162	1.62	70	1	FW483	FW483	G/G	C/C	C/T	C/T	G/G	C/C
1	FW484		384	1	61	1	1	170	1.7	69	0	FW484	FW484	G/G	C/C	C/C	C/C	G/G	C/C
1	FW485		385	2	58	0	0	169	1.69	55	0	FW485	FW485	G/G	C/C	C/C	C/T	G/G	C/T
1	FW486		386	1	64	0	1	162	1.62	71	1	FW486	FW486	G/G	C/C	C/C	C/T	G/G	C/T
1	FW487		387	1	72	0	0	165	1.65	59	0	FW487	FW487	G/A	C/C	C/T	C/C	G/C	C/C
1	FW488		388	1	75	0	0	172	1.72	62	0	FW488	FW488	G/G	C/C	C/T	C/C	G/G	C/C
1	FW489		389	1	42	1	1	160	1.6	55	0	FW489	FW489	G/A	C/C	C/T	C/C	G/C	C/C
1	FW490		390	1	61	1	0	160	1.6	45	0	FW490	FW490	G/G	C/C	C/C	C/C	G/G	T/T
1	FW491		391	1	50	1	0	162	1.62	57	0	FW491	FW491	G/G	C/C	C/C	C/T	G/G	C/T
1	FW492		392	1	63	0	0	165	1.65	49	0	FW492	FW492	G/G	C/C	C/C	C/C	G/G	T/T
1	FW493		393	1	83	0	0	159	1.59	58	0	FW493	FW493	G/G	C/C	C/T	C/T	G/G	C/C
1	FW494		394	1	72	0	0	170	1.7	58	0	FW494	FW494	G/G	G/C	C/C	C/T	G/G	C/T
1	FW495		395	2	62	0	0	158	1.58	63	1	FW495	FW495	G/G	C/C	C/C	C/T	G/G	C/T
1	FW497		396	2	70	0	0	160	1.6	55	0	FW497	FW497	G/G	C/C	T/T	C/C	G/G	C/C
1	FW498		397	1	53	0	0	155	1.55	57	0	FW498	FW498	G/G	C/C	C/C	C/C	G/G	C/T
1	FW499		398	2	49	0	0	160	1.6	72	1	FW499	FW499	G/G	C/C	T/T	C/T	G/G	C/C
1	FW500		399	2	65	0	0	152	1.52	58	1	FW500	FW500	G/G	C/C	C/C	C/T	G/G	C/T
1	FW502		400	1	71	1	0	177	1.77	78	1	FW502	FW502	G/G	C/C	C/T	C/T	G/G	C/C
1	ZW001		401	1	59	1	0	170	1.7	55	0	ZW001	ZW001	G/G	C/C	C/C	C/C	G/G	C/T
1	ZW002		402	1	52	0	0	174	1.74	71	0	ZW002	ZW002	G/G	C/C	T/T	C/C	G/G	C/C
1	ZW003		403	1	79	0	0	172	1.72	66	0	ZW003	ZW003	G/G	C/C	T/T	T/T	G/G	C/C
1	ZW004		404	2	55	0	0	162	1.62	74	1	ZW004	ZW004	G/G	C/C	C/C	C/T	G/G	C/T
1	ZW005		405	2	53	0	0	160	1.6	55	0	ZW005	ZW005	G/G	C/C	C/C	C/C	G/G	C/C
1	ZW006		406	1	70	1	0	165	1.65	75	1	ZW006	ZW006	G/G	G/C	C/C	T/T	G/G	C/T
1	ZW007		407	1	71	0	0	169	1.69	65	0	ZW007	ZW007	G/G	C/C	T/T	C/T	G/G	C/C
1	ZW008		408	1	52	1	0	172	1.72	67	0	ZW008	ZW008	G/G	C/C	C/T	C/T	G/G	C/T
1	ZW009		409	1	66	0	1	168	1.68	60	0	ZW009	ZW009	G/G	C/C	C/T	C/T	G/G	C/T
1	ZW010		410	2	55	0	0	158	1.58	55	0	ZW010	ZW010	G/G	C/C	C/C	C/C	G/G	T/T
1	ZW011		411	2	66	0	0	162	1.62	73	1	ZW011	ZW011	G/A	C/C	C/C	C/C	G/C	C/T
1	ZW012		412	2	63	0	0	158	1.58	62	1	ZW012	ZW012	G/G	C/C	C/T	C/T	G/G	C/C
1	ZW013		413	2	49	0	0	156	1.56	52	0	ZW013	ZW013	G/G	C/C	C/C	C/C	G/G	C/T
1	ZW014		414	1	71	0	0	168	1.68	51	0	ZW014	ZW014	G/G	C/C	C/C	C/C	G/G	C/T
1	ZW015		415	1	63	0	0	173	1.73	65	0	ZW015	ZW015	G/G	C/C	C/C	C/C	G/G	C/T
1	ZW016		416	1	64	0	0	173	1.73	68	0	ZW016	ZW016	G/G	C/C	T/T	C/C	G/G	C/C
1	ZW017		417	1	63	0	1	175	1.75	75	1	ZW017	ZW017	G/G	G/C	C/C	C/C	G/G	T/T
1	ZW018		418	1	51	1	0	170	1.7	50	0	ZW018	ZW018	G/G	C/C	C/T	C/T	G/G	C/C
1	ZW019		419	2	47	0	0	160	1.6	50	0	ZW019	ZW019	G/G	C/C	C/T	C/C	G/G	C/C
1	ZW020		420	1	49	0	0	171	1.71	67	0	ZW020	ZW020	G/G	C/C	C/T	C/T	G/G	C/T
1	ZW021		421	1	43	0	0	170	1.7	75	1	ZW021	ZW021	G/G	C/C	C/C	C/T	G/G	C/T
1	ZW022		422	2	73	0	0	160	1.6	50	0	ZW022	ZW022	G/G	C/C	C/C	C/T	G/G	T/T
1	ZW023		423	1	61	0	0	164	1.64	61	0	ZW023	ZW023	G/G	C/C	C/T	T/T	G/G	C/C
1	ZW024		424	1	54	1	1	168	1.68	60	0	ZW024	ZW024	G/G	C/C	C/T	C/C	G/G	C/T
1	ZW025		425	1	64	1	1	170	1.7	66	0	ZW025	ZW025	G/G	G/C	C/C	C/C	G/G	T/T
1	ZW026		426	1	58	1	1	165	1.65	67	1	ZW026	ZW026	?	?	?	?	?	?
1	ZW027		427	1	77	0	1	178	1.78	50	0	ZW027	ZW027	G/A	C/C	C/C	C/C	G/C	C/T
1	ZW028		428	2	69	0	0	160	1.6	60	0	ZW028	ZW028	G/G	C/C	C/C	C/C	G/G	C/T
1	ZW029		429	1	67	0	0	173	1.73	65	0	ZW029	ZW029	G/G	C/C	C/C	C/C	G/G	C/C
1	ZW030		430	1	79	0	0	175	1.75	75	1	ZW030	ZW030	G/G	G/C	C/C	C/T	G/G	C/T
1	ZW031		431	1	60	0	0	160	1.6	50	0	ZW031	ZW031	G/A	C/C	C/C	C/T	G/C	C/C
1	ZW032		432	1	65	1	0	172	1.72	68	0	ZW032	ZW032	G/G	C/C	C/C	C/C	G/G	C/T
1	ZW033		433	1	54	0	0	170	1.7	62	0	ZW033	ZW033	G/G	C/C	C/C	C/C	G/G	C/T
1	ZW034		434	1	57	0	0	171	1.71	75	1	ZW034	ZW034	G/A	C/C	C/C	C/C	G/C	T/T
1	ZW035		435	2	57	0	0	147	1.47	42	0	ZW035	ZW035	G/G	C/C	C/C	C/C	G/G	T/T
1	ZW036		436	1	44	0	0	170	1.7	79	1	ZW036	ZW036	G/G	C/C	C/C	C/T	G/G	C/T
1	ZW037		437	1	70	0	0	168	1.68	68	1	ZW037	ZW037	G/G	C/C	C/C	C/T	G/G	C/T
1	ZW038		438	1	58	0	1	172	1.72	58	0	ZW038	ZW038	G/G	G/C	C/T	C/C	G/G	C/T
1	ZW039		439	2	43	0	0	164	1.64	51	0	ZW039	ZW039	G/G	C/C	C/C	C/C	G/G	C/T
1	ZW040		440	1	74	0	0	155	1.55	55	0	ZW040	ZW040	G/G	G/G	C/C	C/T	G/G	C/T
1	ZW041		441	1	73	1	0	168	1.68	72	1	ZW041	ZW041	G/G	C/C	C/C	C/C	G/G	C/T
1	ZW042		442	2	75	0	0	148	1.48	60	1	ZW042	ZW042	G/G	C/C	C/C	C/C	G/G	C/T
1	ZW043		443	2	44	0	0	158	1.58	50	0	ZW043	ZW043	G/G	C/C	C/C	C/C	G/G	C/T
1	ZW044		444	1	75	0	0	158	1.58	68	1	ZW044	ZW044	G/G	C/C	C/T	C/C	G/G	C/T
1	ZW045		445	1	85	0	0	175	1.75	64	0	ZW045	ZW045	G/G	C/C	C/T	C/T	G/G	C/C
1	ZW046		446	2	46	0	0	156	1.56	55	0	ZW046	ZW046	G/G	C/C	C/C	C/T	G/G	C/T
1	ZW047		447	1	59	1	0	154	1.54	54	0	ZW047	ZW047	G/G	G/C	C/T	C/T	G/G	C/T
1	ZW048		448	2	53	0	0	160	1.6	65	1	ZW048	ZW048	G/A	C/C	C/C	C/C	G/C	T/T
1	ZW049		449	1	72	1	1	172	1.72	62	0	ZW049	ZW049	G/G	C/C	C/C	C/T	G/G	T/T
1	ZW050		450	2	70	0	0	165	1.65	60	0	ZW050	ZW050	G/G	G/C	C/C	C/T	G/G	C/T
1	ZW051		451	1	69	0	0	175	1.75	64	0	ZW051	ZW051	G/G	C/C	C/T	C/C	G/G	C/C
1	ZW052		452	1	78	1	1	170	1.7	71	1	ZW052	ZW052	G/G	C/C	C/C	C/C	G/G	T/T
1	ZW053		453	1	64	0	0	170	1.7	61.5	0	ZW053	ZW053	G/G	C/C	C/C	C/C	G/G	C/C
1	ZW054		454	1	71	0	0	168	1.68	75	1	ZW054	ZW054	G/G	C/C	C/T	C/T	G/G	C/T
1	ZW055		455	2	78	0	0	153	1.53	51	0	ZW055	ZW055	G/G	C/C	C/C	C/T	G/G	C/T
1	ZW056		456	2	75	0	0	155	1.55	74	1	ZW056	ZW056	G/G	C/C	T/T	C/C	G/G	C/C
1	ZW057		457	1	77	0	0	160	1.6	55	0	ZW057	ZW057	G/G	C/C	C/C	C/T	G/G	C/T
1	ZW058		458	1	51	0	0	160	1.6	64	1	ZW058	ZW058	G/G	C/C	C/C	C/C	G/G	C/T
1	ZW059		459	1	74	0	1	170	1.7	49	0	ZW059	ZW059	G/G	C/C	C/C	C/C	G/G	C/C
1	ZW060		460	2	40	0	0	160	1.6	51	0	ZW060	ZW060	G/A	C/C	C/T	C/C	G/C	C/T
1	ZW061		461	2	66	0	0	158	1.58	50	0	ZW061	ZW061	G/A	C/C	C/C	C/T	G/C	C/C
1	ZW062		462	1	66	0	0	170	1.7	60	0	ZW062	ZW062	G/G	C/C	C/C	C/T	G/G	C/T
1	ZW063		463	1	69	0	0	168	1.68	56	0	ZW063	ZW063	G/G	C/C	C/C	C/C	G/G	C/T
1	ZW064		464	1	75	0	0	172	1.72	80	1	ZW064	ZW064	G/G	C/C	C/T	C/C	G/G	C/T
1	ZW065		465	2	65	0	0	158	1.58	61	1	ZW065	ZW065	G/G	C/C	C/C	C/C	G/G	C/T
1	ZW067		466	2	65	0	0	155	1.55	60	1	ZW067	ZW067	G/G	C/C	C/C	C/C	G/G	C/T
1	ZW068		467	1	64	0	0	160	1.6	75	1	ZW068	ZW068	G/G	C/C	C/C	C/C	G/G	C/T
1	ZW069		468	1	80	1	0	178	1.78	55	0	ZW069	ZW069	G/G	C/C	C/C	C/C	G/G	C/T
1	ZW070		469	1	74	0	0	168	1.68	75	1	ZW070	ZW070	G/G	C/C	C/T	C/C	G/G	C/C
1	ZW071		470	2	50	0	0	168	1.68	68	1	ZW071	ZW071	G/G	C/C	C/C	C/C	G/G	C/T
1	ZW072		471	2	66	0	0	160	1.6	50	0	ZW072	ZW072	G/G	G/C	C/C	C/T	G/G	C/T
1	ZW073		472	2	47	0	0	163	1.63	77	1	ZW073	ZW073	G/G	C/C	C/C	C/C	G/G	C/T
1	ZW074		473	1	69	1	0	170	1.7	63	0	ZW074	ZW074	G/G	C/C	C/T	C/T	G/G	C/T
1	ZW075		474	1	60	1	0	163	1.63	61	0	ZW075	ZW075	G/G	C/C	C/C	C/C	G/G	T/T
1	ZW076		475	1	55	0	0	170	1.7	62.5	0	ZW076	ZW076	G/G	C/C	C/C	C/C	G/G	C/C
1	ZW077		476	2	67	0	0	155	1.55	50	0	ZW077	ZW077	G/G	G/C	C/T	T/T	G/G	C/T
1	ZW078		477	1	49	0	0	175	1.75	82	1	ZW078	ZW078	G/G	G/C	C/C	C/T	G/G	C/T
1	ZW079		478	1	65	1	0	170	1.7	74	1	ZW079	ZW079	G/G	G/C	C/T	C/C	G/G	C/C
1	ZW080		479	1	62	0	0	172	1.72	62	0	ZW080	ZW080	G/G	C/C	C/C	C/C	G/G	C/T
1	ZW081		480	2	78	0	0	160	1.6	50	0	ZW081	ZW081	G/G	G/C	C/C	C/T	G/G	C/T
1	ZW082		481	1	63	0	0	180	1.8	87	1	ZW082	ZW082	G/G	C/C	C/C	C/C	G/G	T/T
1	ZW083		482	1	61	1	0	175	1.75	75	1	ZW083	ZW083	?	C/C	C/C	C/C	G/G	C/C
1	ZW089		483	2	90	0	1	168	1.68	59	0	ZW089	ZW089	G/G	C/C	C/C	C/T	G/G	C/T
1	ZW090		484	1	83	0	0	169	1.69	66	0	ZW090	ZW090	G/G	C/C	C/C	C/C	G/G	C/T
1	ZW091		485	2	72	0	0	160	1.6	39	0	ZW091	ZW091	G/G	C/C	C/C	C/C	G/G	C/T
1	ZW092		486	2	73	0	0	160	1.6	60	0	ZW092	ZW092	G/G	C/C	C/C	C/C	G/G	C/T
1	ZW093		487	2	61	0	0	160	1.6	53	0	ZW093	ZW093	G/G	C/C	C/T	C/C	G/G	C/C
1	ZW094		488	1	69	1	0	169	1.69	75	1	ZW094	ZW094	G/G	C/C	C/C	C/C	G/G	C/T
1	ZW095		489	1	73	1	0	170	1.7	66	0	ZW095	ZW095	G/G	C/C	C/T	C/C	G/G	C/C
1	ZW096		490	2	55	0	0	158	1.58	48	0	ZW096	ZW096	G/G	C/C	C/T	C/T	G/G	C/C
2	D001		491	1	55	0	0	170	1.7	82	1	D001	D001	G/G	C/C	C/T	C/T	G/G	C/C
2	D002		492	2	53	0	0	155	1.55	60	1	D002	D002	G/A	C/C	C/C	C/C	G/C	C/C
2	D003		493	1	59	0	0	170	1.7	71	1	D003	D003	G/G	C/C	C/C	C/T	G/G	C/T
2	D004		494	1	74	0	0	167	1.67	72	1	D004	D004	G/A	C/C	C/T	C/C	G/C	C/C
2	D005		495	2	54	0	0	161	1.61	56	0	D005	D005	G/G	C/C	C/C	C/C	G/G	T/T
2	D006		496	2	70	0	0	163	1.63	70	1	D006	D006	G/G	C/C	C/C	C/T	G/G	C/T
2	D007		497	1	65	1	0	171	1.71	70	0	D007	D007	G/G	C/C	C/C	C/C	G/G	T/T
2	D009		498	1	62	0	0	178	1.78	75	0	D009	D009	G/G	C/C	C/T	C/C	G/G	C/T
2	D010		499	2	77	0	0	150	1.5	55	1	D010	D010	G/G	C/C	C/T	C/T	G/G	C/T
2	D011		500	2	56	0	0	156	1.56	52	0	D011	D011	G/A	C/C	C/C	C/C	G/C	C/T
2	D012		501	1	63	0	0	155	1.55	51	0	D012	D012	G/A	C/C	C/C	C/T	G/C	C/C
2	D013		502	1	51	0	0	170	1.7	75	1	D013	D013	G/G	C/C	C/C	C/C	G/G	C/C
2	D014		503	2	61	0	0	160	1.6	45	0	D014	D014	G/A	C/C	C/C	C/T	G/C	T/T
2	D015		504	1	57	1	0	175	1.75	76	1	D015	D015	G/G	C/C	C/C	C/C	G/G	C/T
2	D016		505	1	81	0	0	170	1.7	80	1	D016	D016	G/G	C/C	C/C	C/T	G/G	T/T
2	D017		506	1	79	0	0	172	1.72	73	1	D017	D017	G/G	C/C	C/C	C/C	G/G	T/T
2	D018		507	1	53	1	0	175	1.75	65	0	D018	D018	G/G	G/C	C/C	C/C	G/G	C/T
2	D019		508	1	65	0	0	174	1.74	56	0	D019	D019	G/G	C/C	T/T	C/C	G/G	C/C
2	D020		509	1	56	0	1	162	1.62	77	1	D020	D020	G/G	C/C	C/C	C/T	G/G	C/T
2	D021		510	1	64	1	1	178	1.78	91	1	D021	D021	G/G	C/C	C/T	C/T	G/G	C/C
2	D022		511	1	62	0	0	170	1.7	80	1	D022	D022	G/G	C/C	C/C	C/C	G/G	C/T
2	D023		512	1	72	1	0	173	1.73	65	0	D023	D023	G/G	C/C	C/C	C/C	G/G	T/T
2	D024		513	1	66	0	0	167	1.67	72	1	D024	D024	G/G	C/C	C/C	C/C	G/G	C/T
2	D025		514	1	29	1	0	176	1.76	78	1	D025	D025	G/G	C/C	C/C	C/T	G/G	C/T
2	D026		515	2	71	0	0	163	1.63	59	0	D026	D026	G/G	C/C	C/T	C/T	G/G	C/C
2	D027		516	1	38	0	0	179	1.79	85	1	D027	D027	G/G	C/C	T/T	C/T	G/G	C/C
2	D028		517	1	71	0	0	170	1.7	80	1	D028	D028	G/A	C/C	C/C	C/T	G/C	T/T
2	D029		518	1	60	1	0	162	1.62	75	1	D029	D029	G/G	C/C	C/T	C/T	G/G	C/C
2	D030		519	2	53	0	0	158	1.58	78	1	D030	D030	G/G	C/C	C/T	C/C	G/G	C/C
2	D031		520	1	58	0	0	173	1.73	70	0	D031	D031	G/G	G/C	C/C	C/C	G/G	C/C
2	D032		521	2	52	0	0	157	1.57	58	0	D032	D032	G/G	C/C	C/C	C/C	G/G	C/C
2	D033		522	1	67	1	0	166	1.66	65	0	D033	D033	G/G	C/C	C/T	C/T	G/G	C/T
2	D034		523	2	69	0	0	158	1.58	60.5	1	D034	D034	G/G	C/C	C/T	C/C	G/G	C/C
2	D035		524	1	80	0	0	168	1.68	72	1	D035	D035	G/G	C/C	C/T	C/C	G/G	C/T
2	D036		525	1	77	1	0	165	1.65	70	1	D036	D036	G/G	C/C	C/T	C/C	G/G	C/C
2	D037		526	2	38	0	0	160	1.6	59	0	D037	D037	G/G	C/C	C/C	C/C	G/G	C/T
2	D038		527	1	28	0	0	176	1.76	66	0	D038	D038	G/G	C/C	C/C	C/C	G/G	C/T
2	D039		528	2	65	0	0	165	1.65	70	1	D039	D039	G/A	C/C	C/C	C/C	G/C	T/T
2	D040		529	2	52	0	0	158.5	1.585	60	0	D040	D040	G/G	C/C	C/T	C/T	G/G	C/T
2	D041		530	1	66	0	0	170	1.7	61	0	D041	D041	G/G	C/C	C/T	C/C	G/G	C/T
2	D042		531	2	46	0	0	163	1.63	49	0	D042	D042	G/G	C/C	C/C	C/T	G/G	T/T
2	D043		532	1	56	1	0	168	1.68	74	1	D043	D043	G/G	C/C	T/T	C/C	G/G	C/C
2	D044		533	2	68	0	0	158	1.58	64	1	D044	D044	G/G	C/C	C/T	T/T	G/G	C/C
2	D045		534	1	59	0	0	165	1.65	50	0	D045	D045	G/G	C/C	C/T	C/C	G/G	C/C
2	D046		535	1	62	0	0	177	1.77	81	1	D046	D046	G/G	C/C	C/T	C/C	G/G	C/T
2	D047		536	1	71	0	0	162	1.62	56	0	D047	D047	G/A	C/C	C/C	C/C	G/C	C/T
2	D048		537	1	60	1	1	168	1.68	54	0	D048	D048	G/G	C/C	C/C	C/C	G/G	C/C
2	D049		538	1	56	1	0	170	1.7	57	0	D049	D049	G/G	C/C	C/C	C/C	G/G	T/T
2	D050		539	1	73	1	0	160	1.6	55	0	D050	D050	G/G	C/C	C/T	C/C	G/G	C/C
2	D051		540	1	60	0	0	168	1.68	60	0	D051	D051	G/G	C/C	C/C	C/C	G/G	C/T
2	D052		541	2	72	0	0	161	1.61	59	0	D052	D052	G/G	C/C	C/T	C/C	G/G	C/C
2	D053		542	2	61	0	0	156	1.56	50	0	D053	D053	G/G	C/C	C/C	C/C	G/G	C/T
2	D054		543	2	66	0	0	152	1.52	50	0	D054	D054	G/G	C/C	C/T	C/C	G/G	C/C
2	D055		544	1	61	1	0	166	1.66	60	0	D055	D055	G/A	C/C	C/C	C/C	G/C	C/C
2	D056		545	1	71	1	0	167	1.67	55	0	D056	D056	G/G	C/C	C/C	C/T	G/G	C/T
2	D057		546	1	77	0	0	153	1.53	52	0	D057	D057	G/G	C/C	C/C	C/C	G/G	C/T
2	D058		547	1	64	1	0	164	1.64	64	0	D058	D058	G/G	C/C	C/C	C/T	G/G	C/T
2	D059		548	2	54	0	0	155	1.55	52	0	D059	D059	G/G	C/C	C/T	C/C	G/G	C/T
2	D060		549	1	63	0	0	178	1.78	71	0	D060	D060	G/G	C/C	C/T	C/T	G/G	C/T
2	D061		550	2	56	0	0	160	1.6	55	0	D061	D061	G/A	C/C	C/T	C/T	G/C	C/C
2	D062		551	1	63	1	0	170	1.7	65	0	D062	D062	G/G	C/C	C/C	T/T	G/G	T/T
2	D063		552	2	71	0	0	153	1.53	60	1	D063	D063	G/G	C/C	C/C	C/C	G/G	C/T
2	D064		553	1	72	1	0	160	1.6	60	0	D064	D064	G/G	C/C	C/C	C/T	G/G	C/C
2	D065		554	1	46	0	0	170	1.7	65	0	D065	D065	G/G	C/C	C/C	C/C	G/G	T/T
2	D066		555	1	62	1	0	165	1.65	60	0	D066	D066	G/G	C/C	C/C	C/C	G/G	C/T
2	D067		556	2	59	0	0	154	1.54	41	0	D067	D067	G/G	C/C	C/C	C/C	G/G	C/T
2	D068		557	2	79	0	0	158	1.58	50	0	D068	D068	G/G	C/C	C/C	C/C	G/G	T/T
2	D069		558	2	60	0	0	158	1.58	60	1	D069	D069	G/A	C/C	C/C	C/C	G/C	T/T
2	D070		559	2	52	0	0	163	1.63	64	1	D070	D070	G/G	C/C	C/C	C/C	G/G	T/T
2	D071		560	1	56	1	0	171	1.71	60	0	D071	D071	G/G	C/C	C/T	C/C	G/G	C/T
2	D072		561	1	59	1	0	177	1.77	65	0	D072	D072	G/G	C/C	C/C	C/C	G/G	C/C
2	D073		562	1	61	0	0	163	1.63	66	1	D073	D073	G/G	C/C	C/C	C/T	G/G	C/T
2	D075		563	1	63	0	0	178	1.78	78	1	D075	D075	G/G	C/C	C/C	C/C	G/G	T/T
2	D076		564	1	75	1	0	163	1.63	67	1	D076	D076	G/G	C/C	C/T	C/T	G/G	C/T
2	D077		565	1	72	0	0	168	1.68	57	0	D077	D077	G/A	C/C	C/T	C/T	G/C	C/C
2	D078		566	1	64	0	1	182	1.82	70	0	D078	D078	G/A	C/C	C/C	C/C	G/C	T/T
2	D079		567	2	67	0	0	151	1.51	62	1	D079	D079	G/G	C/C	C/C	C/C	G/G	T/T
2	D080		568	1	58	1	0	165	1.65	58	0	D080	D080	G/A	C/C	C/C	C/C	G/C	C/C
2	D081		569	1	70	1	1	169	1.69	76	1	D081	D081	G/G	C/C	C/C	C/C	G/G	T/T
2	D082		570	1	58	0	0	168	1.68	65	0	D082	D082	G/A	C/C	C/T	C/C	G/C	C/C
2	D083		571	1	78	0	0	160	1.6	75	1	D083	D083	G/G	C/C	C/T	C/C	G/G	C/T
2	D084		572	2	61	0	0	155	1.55	57	0	D084	D084	G/G	C/C	C/T	C/C	G/G	C/T
2	D085		573	1	67	0	0	165	1.65	68	1	D085	D085	G/G	C/C	C/T	C/C	G/G	C/T
2	D086		574	1	41	1	0	182	1.82	89	1	D086	D086	G/G	C/C	C/C	C/C	G/G	C/T
2	D087		575	2	69	0	0	160	1.6	45	0	D087	D087	G/G	C/C	C/C	C/C	G/G	C/C
2	D088		576	1	62	0	0	167	1.67	50	0	D088	D088	G/G	C/C	C/C	C/C	G/G	T/T
2	D089		577	1	69	0	0	168	1.68	60	0	D089	D089	G/G	C/C	C/C	C/T	G/G	C/C
2	D090		578	1	81	0	0	158	1.58	54	0	D090	D090	G/G	C/C	C/C	T/T	G/G	C/T
2	D091		579	1	57	1	0	165	1.65	60	0	D091	D091	G/G	C/C	C/C	C/T	G/G	C/T
2	D092		580	2	51	0	0	155	1.55	60	1	D092	D092	G/G	C/C	C/C	C/C	G/G	C/C
2	D093		581	1	55	1	0	176	1.76	70	0	D093	D093	G/G	C/C	C/T	C/T	G/G	C/T
2	D094		582	2	37	0	0	158	1.58	54	0	D094	D094	G/G	C/C	C/T	C/C	G/G	C/T
2	D095		583	1	65	1	1	175	1.75	65	0	D095	D095	G/A	C/C	C/T	C/C	G/C	C/T
2	D096		584	1	57	0	0	168	1.68	84	1	D096	D096	G/G	C/C	T/T	C/C	G/G	C/C
2	D097		585	1	80	0	0	155	1.55	56	0	D097	D097	G/G	C/C	C/C	C/C	G/G	C/T
2	D098		586	2	49	0	0	157	1.57	46	0	D098	D098	G/G	C/C	C/T	C/T	G/G	C/T
2	D099		587	2	46	0	0	158	1.58	42	0	D099	D099	G/G	C/C	C/C	C/T	G/G	C/T
2	D100		588	1	65	0	0	168	1.68	63	0	D100	D100	G/G	C/C	C/T	C/C	G/G	C/T
2	D101		589	2	64	0	0	168	1.68	88	1	D101	D101	G/A	C/C	C/C	C/C	G/C	C/T
2	D102		590	2	65	0	0	162	1.62	62	0	D102	D102	G/G	C/C	C/T	C/C	G/G	C/T
2	D103		591	1	69	1	0	172	1.72	65	0	D103	D103	G/G	C/C	C/C	C/C	G/G	C/T
2	D104		592	1	78	0	0	180	1.8	82	1	D104	D104	G/A	C/C	C/T	C/T	G/C	C/T
2	D105		593	1	43	0	0	172	1.72	62	0	D105	D105	G/G	G/C	C/C	T/T	G/G	C/C
2	D106		594	1	64	0	0	170	1.7	69	0	D106	D106	G/G	C/C	C/T	C/T	G/G	C/C
2	D107		595	2	56	0	0	162	1.62	63	1	D107	D107	G/G	C/C	C/C	C/C	G/G	C/T
2	D108		596	2	78	0	0	152	1.52	60	1	D108	D108	G/G	G/C	C/T	C/T	G/G	C/C
2	D109		597	2	52	0	0	163	1.63	65	1	D109	D109	G/G	C/C	C/C	C/C	G/G	C/C
2	D110		598	2	57	0	0	150	1.5	43	0	D110	D110	G/G	C/C	T/T	C/C	G/G	C/C
2	D111		599	2	80	0	0	163	1.63	70	1	D111	D111	G/G	C/C	C/C	C/C	G/G	T/T
2	D112		600	2	73	0	0	154	1.54	55	0	D112	D112	G/A	C/C	C/C	C/T	G/C	C/C
2	D113		601	2	67	0	0	149	1.49	49	0	D113	D113	G/G	C/C	C/C	C/C	G/G	T/T
2	D114		602	2	53	0	0	158	1.58	53	0	D114	D114	G/G	C/C	C/T	C/T	G/G	C/T
2	D115		603	1	48	1	0	160	1.6	66	1	D115	D115	G/A	C/C	C/T	C/T	G/C	C/T
2	D116		604	1	57	1	0	169	1.69	60	0	D116	D116	G/A	C/C	C/C	C/C	G/C	T/T
2	D117		605	1	62	1	0	166	1.66	70	1	D117	D117	G/G	C/C	C/C	C/C	G/G	C/T
2	D118		606	2	71	0	0	145	1.45	47	0	D118	D118	G/G	C/C	C/C	C/C	G/G	C/C
2	D119		607	1	69	1	1	150	1.5	52	0	D119	D119	G/G	C/C	C/T	C/C	G/G	C/C
2	D120		608	2	53	0	0	168	1.68	46	0	D120	D120	G/G	C/C	C/C	C/T	G/G	C/C
2	D121		609	1	75	0	0	162	1.62	70	1	D121	D121	G/G	C/C	C/T	C/C	G/G	C/T
2	D122		610	2	49	0	0	147	1.47	65	1	D122	D122	G/A	C/C	C/C	C/T	G/C	C/T
2	D123		611	2	61	0	0	155	1.55	50	0	D123	D123	G/G	C/C	C/T	C/C	G/G	C/C
2	D124		612	2	62	0	0	170	1.7	76	1	D124	D124	G/G	C/C	C/C	C/T	G/G	T/T
2	D125		613	1	53	1	0	178	1.78	77	1	D125	D125	G/G	C/C	C/C	C/T	G/G	C/T
2	D126		614	1	62	0	0	163	1.63	78	1	D126	D126	G/G	C/C	C/C	C/C	G/G	C/T
2	D127		615	2	78	0	0	150	1.5	65	1	D127	D127	G/G	C/C	C/C	C/C	G/G	T/T
2	D128		616	1	63	0	0	167	1.67	58	0	D128	D128	G/G	C/C	C/T	C/C	G/G	C/C
2	D129		617	1	33	0	0	179	1.79	71	0	D129	D129	G/G	C/C	C/C	C/C	G/G	C/T
2	D130		618	1	81	0	0	170	1.7	80	1	D130	D130	G/G	C/C	T/T	C/T	G/G	C/C
2	D131		619	2	59	0	0	162	1.62	73	1	D131	D131	G/G	C/C	C/T	C/T	G/G	C/T
2	D132		620	2	70	0	0	157	1.57	57	0	D132	D132	G/A	C/C	C/C	C/C	G/C	C/T
2	D133		621	2	56	0	0	162	1.62	58	0	D133	D133	G/G	C/C	C/T	C/C	G/G	C/C
2	D134		622	1	69	0	0	156	1.56	69	1	D134	D134	G/G	C/C	C/T	C/C	G/G	C/T
2	D135		623	1	58	0	0	167	1.67	62	0	D135	D135	G/G	C/C	C/C	C/T	G/G	C/T
2	D136		624	1	60	1	0	168	1.68	67	0	D136	D136	G/G	C/C	C/C	C/C	G/G	C/T
2	D137		625	1	59	0	0	175	1.75	74	1	D137	D137	G/A	C/C	C/C	C/C	G/C	C/T
2	D138		626	1	76	1	0	156	1.56	52	0	D138	D138	G/G	C/C	C/T	C/C	G/G	C/C
2	D139		627	1	52	0	0	173	1.73	63	0	D139	D139	G/G	C/C	C/C	C/C	G/G	T/T
2	D140		628	2	34	0	0	160	1.6	60	0	D140	D140	G/G	C/C	C/C	C/T	G/G	C/C
2	D141		629	1	60	1	0	168	1.68	70	1	D141	D141	G/G	C/C	C/C	C/C	G/G	C/T
2	D142		630	1	76	1	0	171	1.71	60	0	D142	D142	G/G	C/C	C/C	C/C	G/G	C/T
2	D144		631	1	81	1	0	166	1.66	60	0	D144	D144	G/G	C/C	C/T	C/C	G/G	C/T
2	D145		632	2	50	0	0	158	1.58	63	1	D145	D145	G/G	C/C	C/C	T/T	G/G	C/C
2	D146		633	1	57	0	0	167	1.67	60	0	D146	D146	G/G	C/C	C/C	C/T	G/G	C/C
2	D147		634	1	51	0	0	165	1.65	65	0	D147	D147	G/G	C/C	T/T	C/T	G/G	C/C
2	D148		635	1	76	0	0	163	1.63	63	0	D148	D148	G/G	C/C	C/C	C/C	G/G	T/T
2	D149		636	1	64	0	0	170	1.7	62	0	D149	D149	G/G	C/C	C/T	C/T	G/G	C/C
2	D150		637	1	60	0	0	170	1.7	69	0	D150	D150	G/G	C/C	C/C	C/C	G/G	T/T
2	D151		638	2	65	0	0	155	1.55	62	1	D151	D151	G/G	C/C	C/C	C/C	G/G	C/T
2	D152		639	1	55	0	0	177	1.77	87	1	D152	D152	G/G	C/C	C/C	C/T	G/G	T/T
2	D153		640	2	70	0	0	160	1.6	40	0	D153	D153	G/G	C/C	C/T	C/T	G/G	C/T
2	D154		641	1	38	1	0	169	1.69	68	0	D154	D154	G/A	C/C	C/C	C/T	G/C	T/T
2	D155		642	1	64	0	0	170	1.7	77	1	D155	D155	G/A	C/C	C/C	C/T	G/C	C/T
2	D156		643	1	62	0	0	160	1.6	58	0	D156	D156	G/G	C/C	C/C	C/C	G/G	C/C
2	D157		644	1	54	1	0	175	1.75	70	0	D157	D157	G/A	C/C	C/C	C/C	G/C	T/T
2	D158		645	1	64	0	0	162	1.62	49	0	D158	D158	G/G	G/C	C/T	C/T	G/G	C/C
2	D159		646	1	56	0	0	165	1.65	62	0	D159	D159	G/G	C/C	C/C	C/C	G/G	T/T
2	D160		647	2	60	0	0	153	1.53	65	1	D160	D160	G/G	C/C	C/C	C/C	G/G	C/T
2	D161		648	1	64	0	0	174	1.74	71	0	D161	D161	G/G	C/C	C/C	C/C	G/G	C/T
2	D162		649	1	78	0	0	160	1.6	65	1	D162	D162	G/G	C/C	C/C	C/C	G/G	C/C
2	D163		650	1	58	0	0	175	1.75	70	0	D163	D163	G/G	C/C	C/C	C/T	G/G	C/T
2	D164		651	1	46	0	0	184	1.84	80	0	D164	D164	G/G	C/C	C/C	C/C	G/G	C/C
2	D165		652	2	72	0	0	153	1.53	50	0	D165	D165	G/G	G/C	C/T	C/T	G/G	C/T
2	D167		653	1	44	1	0	170	1.7	75	1	D167	D167	G/G	C/C	C/T	C/C	G/G	C/T
2	D168		654	2	41	0	0	158	1.58	47	0	D168	D168	G/G	C/C	C/C	C/T	G/G	C/T
2	D169		655	1	46	1	0	178	1.78	84	1	D169	D169	G/G	C/C	C/C	C/C	G/G	C/T
2	D170		656	1	82	1	0	168	1.68	64	0	D170	D170	G/G	C/C	C/T	C/T	G/G	C/T
2	D171		657	2	67	0	0	165	1.65	65	0	D171	D171	G/G	C/C	C/C	C/T	G/G	C/T
2	D172		658	2	65	0	0	155	1.55	55	0	D172	D172	G/G	C/C	C/T	C/C	G/G	C/C
2	D173		659	2	66	0	0	158	1.58	60	1	D173	D173	G/G	C/C	C/T	T/T	G/G	C/T
2	D174		660	1	61	1	0	160	1.6	53	0	D174	D174	G/G	C/C	C/T	C/T	G/G	C/T
2	D175		661	1	52	0	0	170	1.7	63	0	D175	D175	G/G	C/C	C/T	C/C	G/G	C/C
2	D176		662	2	67	0	0	156	1.56	67	1	D176	D176	G/G	C/C	C/C	C/T	G/G	C/T
2	D177		663	1	60	1	0	168	1.68	79	1	D177	D177	G/G	C/C	C/C	C/T	G/G	C/C
2	D178		664	1	56	1	0	172	1.72	62	0	D178	D178	G/G	C/C	C/C	C/T	G/G	C/T
2	D179		665	1	60	0	0	158	1.58	60	1	D179	D179	G/G	C/C	C/C	C/C	G/G	T/T
2	D180		666	1	57	0	0	170	1.7	70	1	D180	D180	G/G	C/C	C/C	C/T	G/G	C/T
2	D181		667	2	65	0	0	158	1.58	52	0	D181	D181	G/G	C/C	C/T	C/C	G/G	C/T
2	D182		668	2	70	0	0	154	1.54	55	0	D182	D182	G/G	C/C	C/T	C/C	G/G	C/C
2	D183		669	2	69	0	0	157	1.57	62	1	D183	D183	G/G	C/C	C/C	C/T	G/G	C/T
2	D184		670	1	74	0	0	169	1.69	65	0	D184	D184	G/G	C/C	C/T	C/T	G/G	C/C
2	D185		671	1	63	1	0	175	1.75	85	1	D185	D185	G/G	C/C	C/T	C/C	G/G	C/T
2	D186		672	1	53	1	0	170	1.7	67	0	D186	D186	G/G	C/C	C/T	C/T	G/G	C/T
2	D187		673	2	25	0	0	174	1.74	54	0	D187	D187	G/A	G/C	C/C	C/C	G/C	T/T
2	D188		674	2	79	0	0	150	1.5	47	0	D188	D188	G/G	C/C	C/C	T/T	G/G	C/T
2	D189		675	2	43	0	0	154	1.54	49	0	D189	D189	G/G	C/C	C/C	C/C	G/G	C/T
2	D190		676	1	62	1	0	173	1.73	91	1	D190	D190	G/G	C/C	C/C	C/C	G/G	C/C
2	D191		677	2	74	0	0	170	1.7	81	1	D191	D191	G/G	C/C	C/C	C/C	G/G	C/T
2	D192		678	2	73	0	0	153	1.53	39	0	D192	D192	G/G	C/C	C/C	C/T	G/G	C/T
2	D193		679	2	62	0	0	152	1.52	52	0	D193	D193	G/G	G/C	C/T	T/T	G/G	C/C
2	D194		680	1	74	1	0	165	1.65	65	0	D194	D194	G/A	C/C	T/T	C/C	G/C	C/C
2	D195		681	1	58	0	0	171	1.71	65	0	D195	D195	G/G	C/C	C/C	C/C	G/G	T/T
2	D196		682	2	69	0	0	155	1.55	60	1	D196	D196	G/G	C/C	C/T	C/C	G/G	C/C
2	D197		683	2	51	0	0	168	1.68	67	0	D197	D197	G/A	C/C	C/T	C/C	G/C	C/C
2	D198		684	1	61	0	0	170	1.7	75	1	D198	D198	G/G	C/C	C/C	C/C	G/G	T/T
2	D199		685	1	66	0	0	155	1.55	65	1	D199	D199	G/G	C/C	C/T	C/C	G/G	C/T
2	D200		686	1	74	1	0	176	1.76	74	0	D200	D200	G/G	C/C	C/C	C/C	G/G	C/C
2	D202		687	1	55	0	0	168	1.68	68	1	D202	D202	G/G	C/C	C/T	C/T	G/G	C/T
2	D203		688	2	72	0	0	150	1.5	50	0	D203	D203	G/G	C/C	C/T	C/C	G/G	C/T
2	D204		689	1	56	0	0	170	1.7	60	0	D204	D204	G/G	C/C	C/C	C/T	G/G	T/T
2	D205		690	2	78	0	0	160	1.6	75	1	D205	D205	G/G	C/C	C/T	C/T	G/G	C/T
2	D206		691	1	43	0	0	170	1.7	70	1	D206	D206	G/G	C/C	C/C	C/T	G/G	T/T
2	D207		692	2	63	0	0	150	1.5	54	1	D207	D207	G/G	C/C	C/C	C/T	G/G	C/T
2	D208		693	2	61	0	0	160	1.6	70	1	D208	D208	G/A	C/C	C/T	C/T	G/C	C/T
2	D209		694	1	59	1	0	165	1.65	76	1	D209	D209	G/G	C/C	C/T	C/C	G/G	C/C
2	D210		695	1	60	1	0	163	1.63	63	0	D210	D210	G/G	C/C	C/C	C/C	G/G	T/T
2	D211		696	1	77	0	0	169	1.69	81	1	D211	D211	G/G	C/C	C/C	C/C	G/G	T/T
2	D212		697	1	79	0	0	160	1.6	65	1	D212	D212	G/A	C/C	C/C	C/C	G/C	T/T
2	D213		698	2	63	0	0	162	1.62	69	1	D213	D213	G/A	C/C	C/T	C/T	G/C	C/C
2	D214		699	2	39	0	0	164	1.64	68	1	D214	D214	G/G	C/C	C/C	C/C	G/G	C/C
2	D215		700	1	42	0	0	165	1.65	75	1	D215	D215	G/G	C/C	C/T	C/C	G/G	C/T
2	D216		701	1	68	0	1	169	1.69	68	0	D216	D216	G/G	C/C	C/C	C/T	G/G	C/T
2	D217		702	1	58	0	0	168	1.68	66	0	D217	D217	G/G	C/C	C/T	C/C	G/G	C/C
2	D218		703	1	54	0	0	180	1.8	74	0	D218	D218	G/G	C/C	C/T	C/C	G/G	C/T
2	D219		704	1	57	1	0	167	1.67	77	1	D219	D219	G/G	C/C	C/C	C/T	G/G	C/T
2	D220		705	1	66	0	0	169	1.69	59	0	D220	D220	G/G	C/C	C/C	C/T	G/G	T/T
2	D221		706	1	74	0	0	165	1.65	67	1	D221	D221	G/G	C/C	C/C	C/T	G/G	T/T
2	D222		707	2	50	0	0	162	1.62	52	0	D222	D222	G/G	C/C	C/T	C/T	G/G	C/T
2	D223		708	1	68	1	0	168	1.68	95	1	D223	D223	G/G	C/C	C/C	C/T	G/G	C/T
2	D224		709	1	60	0	0	166	1.66	70	1	D224	D224	G/G	C/C	C/C	C/C	G/G	C/T
2	D225		710	1	44	1	0	167	1.67	75	1	D225	D225	G/G	C/C	C/C	C/T	G/G	C/C
2	D226		711	2	59	0	0	162	1.62	65	1	D226	D226	G/G	C/C	C/C	C/C	G/G	T/T
2	D227		712	1	73	0	0	167	1.67	77	1	D227	D227	G/G	C/C	C/C	C/C	G/G	C/T
2	D228		713	1	75	1	0	173	1.73	75	1	D228	D228	G/G	C/C	T/T	C/T	G/G	C/C
2	D229		714	1	65	0	0	173	1.73	62	0	D229	D229	A/A	C/C	C/T	C/C	C/C	C/T
2	D230		715	1	62	1	0	173	1.73	70	0	D230	D230	G/G	C/C	C/C	C/C	G/G	C/T
2	D231		716	1	57	0	0	170	1.7	63	0	D231	D231	G/G	C/C	C/T	C/T	G/G	C/T
2	D232		717	2	76	0	0	154	1.54	58	1	D232	D232	G/G	C/C	C/C	C/T	G/G	C/T
2	D233		718	1	46	0	0	172	1.72	72	1	D233	D233	G/G	C/C	C/C	C/T	G/G	C/T
2	D234		719	1	47	1	0	172	1.72	87	1	D234	D234	G/G	C/C	C/C	C/C	G/G	C/T
2	D236		720	2	60	0	0	165	1.65	71	1	D236	D236	G/G	C/C	C/C	C/C	G/G	C/C
2	D237		721	1	59	0	0	172	1.72	70	0	D237	D237	G/G	C/C	C/T	C/C	G/G	C/T
2	D238		722	2	52	0	0	156	1.56	46	0	D238	D238	G/G	C/C	C/C	C/C	G/G	C/T
2	D239		723	1	52	0	0	166	1.66	67	1	D239	D239	G/A	C/C	C/T	C/T	G/C	C/T
2	D240		724	1	76	0	0	154	1.54	60	1	D240	D240	G/G	C/C	C/C	C/C	G/G	C/C
2	D241		725	1	75	0	0	170	1.7	80	1	D241	D241	G/G	C/C	C/T	C/C	G/G	C/T
2	D242		726	2	51	0	0	162	1.62	64	1	D242	D242	G/A	C/C	C/T	C/C	G/C	C/C
2	D243		727	1	66	0	0	162	1.62	73	1	D243	D243	G/G	C/C	C/T	C/C	G/G	C/C
2	D244		728	1	47	1	0	158	1.58	65	1	D244	D244	G/G	C/C	C/T	C/T	G/G	C/C
2	D245		729	2	61	0	0	165	1.65	55	0	D245	D245	G/G	C/C	C/T	C/C	G/G	C/C
2	D246		730	1	44	0	0	176	1.76	73	0	D246	D246	G/G	C/C	C/C	C/C	G/G	C/T
2	D247		731	2	62	0	0	150	1.5	65	1	D247	D247	G/A	C/C	C/C	C/C	G/C	C/C
2	D248		732	1	40	0	0	166	1.66	70	1	D248	D248	G/G	C/C	C/T	C/T	G/G	C/T
2	D249		733	1	50	0	1	166	1.66	73	1	D249	D249	G/G	C/C	C/C	C/C	G/G	C/C
2	D250		734	2	59	0	0	145	1.45	48	0	D250	D250	G/G	G/C	C/T	C/T	G/G	C/T
2	D251		735	1	48	0	0	175	1.75	75	1	D251	D251	G/G	C/C	C/C	C/T	G/G	C/T
2	D252		736	1	74	1	1	169	1.69	71	1	D252	D252	G/G	C/C	C/T	C/T	G/G	C/T
2	D254		737	1	57	0	0	174	1.74	58	0	D254	D254	G/G	C/C	C/C	T/T	G/G	C/T
2	D255		738	1	69	1	0	174	1.74	80	1	D255	D255	G/G	C/C	C/C	C/C	G/G	T/T
2	D256		739	1	62	0	0	158	1.58	70	1	D256	D256	G/G	C/C	C/C	C/C	G/G	C/T
2	D257		740	2	57	0	0	163	1.63	76	1	D257	D257	G/G	C/C	C/C	C/T	G/G	C/T
2	D258		741	1	37	0	0	175	1.75	63	0	D258	D258	G/A	C/C	C/T	C/T	G/C	C/C
2	D259		742	1	64	0	0	182	1.82	81	1	D259	D259	G/G	C/C	C/T	C/T	G/G	C/C
2	D260		743	1	64	0	0	160	1.6	58	0	D260	D260	G/G	C/C	C/C	C/C	G/G	T/T
2	D261		744	1	45	0	0	168	1.68	83	1	D261	D261	G/G	C/C	C/T	C/T	G/G	C/T
2	D262		745	1	77	0	0	167	1.67	62	0	D262	D262	G/G	C/C	C/C	C/C	G/G	C/T
2	D263		746	1	60	0	0	172	1.72	60	0	D263	D263	G/G	C/C	C/C	C/T	G/G	C/T
2	D264		747	1	68	0	0	167	1.67	62	0	D264	D264	G/A	C/C	C/C	C/C	G/C	C/T
2	D265		748	1	49	1	1	165	1.65	60	0	D265	D265	G/A	C/C	T/T	C/T	G/C	C/C
2	D266		749	1	49	0	0	160	1.6	50	0	D266	D266	G/G	C/C	C/C	C/T	G/G	C/T
2	D267		750	1	43	0	0	173	1.73	74	1	D267	D267	G/G	C/C	C/T	C/C	G/G	C/C
2	D268		751	1	81	0	0	160	1.6	67	1	D268	D268	G/G	C/C	C/T	C/C	G/G	C/T
2	D269		752	1	46	0	0	169	1.69	70	1	D269	D269	G/A	C/C	C/C	C/C	G/C	C/T
2	D270		753	2	55	0	0	150	1.5	75	1	D270	D270	G/G	C/C	C/C	C/C	G/G	T/T
2	D271		754	1	79	1	1	170	1.7	65	0	D271	D271	A/A	C/C	C/C	C/C	G/C	T/T
2	D272		755	1	71	1	1	164	1.64	55	0	D272	D272	G/G	C/C	C/T	C/T	G/G	C/T
2	D273		756	1	64	0	0	169	1.69	63	0	D273	D273	G/G	C/C	C/C	C/T	G/G	C/T
2	D274		757	2	57	0	0	163	1.63	55	0	D274	D274	G/G	C/C	C/C	C/T	G/G	T/T
2	D275		758	2	78	0	0	158	1.58	65	1	D275	D275	G/G	C/C	C/C	C/C	G/G	C/C
2	D276		759	1	58	1	0	178	1.78	80	1	D276	D276	G/G	C/C	C/C	C/C	G/G	C/C
2	D277		760	1	74	0	0	170	1.7	67	0	D277	D277	G/G	C/C	C/C	T/T	G/G	C/T
2	D278		761	1	41	0	0	165	1.65	70	1	D278	D278	G/G	C/C	C/C	C/T	G/G	C/C
2	D279		762	2	54	0	0	158	1.58	68	1	D279	D279	G/G	C/C	C/T	C/C	G/G	C/T
2	D280		763	1	59	1	1	178	1.78	60	0	D280	D280	G/G	C/C	C/C	C/C	G/G	C/T
2	D281		764	1	70	0	0	168	1.68	56	0	D281	D281	G/G	C/C	C/T	C/C	G/G	C/T
2	D282		765	1	55	1	0	172	1.72	86	1	D282	D282	G/G	C/C	C/C	C/C	G/G	C/T
2	D283		766	1	35	0	0	173	1.73	71	0	D283	D283	G/G	C/C	C/C	C/T	G/G	C/T
2	D284		767	1	58	0	0	175	1.75	60	0	D284	D284	G/G	C/C	C/C	C/T	G/G	C/T
2	D285		768	1	59	0	0	172	1.72	72	1	D285	D285	G/G	C/C	C/C	C/T	G/G	T/T
2	D286		769	1	60	0	0	170	1.7	66	0	D286	D286	G/G	G/C	C/T	C/T	G/G	C/T
2	D287		770	1	58	0	0	168	1.68	62	0	D287	D287	G/G	C/C	C/T	C/C	G/G	C/T
2	D289		771	2	60	0	0	158	1.58	46	0	D289	D289	G/G	C/C	C/C	C/C	G/G	C/T
2	D290		772	2	61	0	0	160	1.6	57	0	D290	D290	G/G	C/C	C/T	C/C	G/G	C/T
2	D292		773	2	67	0	0	157	1.57	55	0	D292	D292	G/G	C/C	C/C	C/C	G/G	T/T
2	D293		774	1	59	1	0	180	1.8	88	1	D293	D293	G/G	C/C	C/C	T/T	G/G	C/T
2	D294		775	2	55	0	0	160	1.6	52	0	D294	D294	G/G	C/C	T/T	C/T	G/G	C/C
2	D295		776	1	66	0	0	168	1.68	60	0	D295	D295	G/G	C/C	C/C	C/C	G/G	T/T
2	D296		777	1	64	0	0	170	1.7	73	1	D296	D296	G/G	C/C	C/T	C/C	G/G	C/T
2	D297		778	1	71	0	0	173	1.73	71	0	D297	D297	G/G	C/C	C/C	C/T	G/G	C/C
2	D298		779	1	56	1	0	168	1.68	70	1	D298	D298	G/G	C/C	T/T	C/C	G/G	C/C
2	D299		780	2	61	0	0	155	1.55	63	1	D299	D299	G/G	C/C	C/C	C/C	G/G	C/T
2	D300		781	1	73	1	0	160	1.6	47	0	D300	D300	G/G	C/C	C/C	C/T	G/G	C/C
2	D301		782	1	60	1	0	169	1.69	68	0	D301	D301	G/G	C/C	C/C	C/C	G/G	T/T
2	D302		783	2	66	0	0	148	1.48	50	0	D302	D302	G/G	C/C	C/C	C/T	G/G	C/T
2	D303		784	2	63	0	0	162	1.62	72	1	D303	D303	G/G	C/C	C/T	C/C	G/G	C/T
2	D304		785	1	65	1	0	161	1.61	70	1	D304	D304	G/G	C/C	C/T	C/T	G/G	C/C
2	D305		786	1	60	0	0	155	1.55	53	0	D305	D305	G/G	C/C	C/C	C/C	G/G	C/T
2	D306		787	2	51	0	0	158	1.58	58	0	D306	D306	G/G	C/C	C/C	C/T	G/G	C/C
2	D307		788	1	57	0	0	165	1.65	69	1	D307	D307	G/G	C/C	C/C	C/T	G/G	T/T
2	D308		789	2	79	0	0	142	1.42	60	1	D308	D308	G/G	C/C	C/T	C/C	G/G	C/T
2	D309		790	1	55	1	1	170	1.7	67	0	D309	D309	G/A	C/C	C/T	C/T	G/C	C/T
2	D310		791	1	51	0	0	162	1.62	69	1	D310	D310	G/G	C/C	C/T	C/C	G/G	C/T
2	D311		792	2	66	0	0	160	1.6	51	0	D311	D311	G/G	C/C	C/T	C/C	G/G	C/C
2	D312		793	1	53	1	0	163	1.63	53	0	D312	D312	G/G	C/C	C/C	C/C	G/G	C/T
2	D313		794	1	61	0	0	162	1.62	80	1	D313	D313	G/A	C/C	C/T	C/C	G/C	C/C
2	D314		795	2	79	0	0	167	1.67	55	0	D314	D314	G/A	C/C	C/T	C/C	G/C	C/T
2	D315		796	1	62	0	0	175	1.75	75	1	D315	D315	G/G	C/C	C/C	C/C	G/G	C/C
2	D316		797	1	60	1	0	170	1.7	72	1	D316	D316	G/G	C/C	C/T	C/C	G/G	C/C
2	D317		798	1	71	1	1	168	1.68	68	1	D317	D317	G/G	C/C	C/T	C/T	G/G	C/C
2	D318		799	1	67	0	0	157	1.57	52	0	D318	D318	G/G	C/C	C/C	C/C	G/G	T/T
2	D319		800	2	69	0	0	161	1.61	55	0	D319	D319	G/G	C/C	C/T	C/C	G/G	C/T
2	D320		801	1	62	0	0	165	1.65	59	0	D320	D320	G/G	C/C	C/C	C/C	G/G	C/C
2	D321		802	1	61	1	0	174	1.74	62	0	D321	D321	G/G	G/C	C/T	C/T	G/G	C/T
2	D322		803	1	62	1	0	170	1.7	69	0	D322	D322	G/G	C/C	C/T	C/C	G/G	C/C
2	D323		804	2	70	0	0	160	1.6	65	1	D323	D323	A/A	G/C	C/C	C/C	C/C	T/T
2	D324		805	2	56	0	0	163	1.63	66	1	D324	D324	G/G	C/C	C/C	C/C	G/G	T/T
2	D325		806	2	68	0	0	159	1.59	61	1	D325	D325	G/G	C/C	C/C	C/T	G/G	T/T
2	D326		807	2	53	0	0	168	1.68	68	1	D326	D326	G/G	C/C	C/C	C/C	G/G	C/T
2	D327		808	2	56	0	0	157	1.57	70	1	D327	D327	G/G	C/C	C/C	C/T	G/G	C/T
2	D328		809	2	48	0	0	160	1.6	53	0	D328	D328	G/G	C/C	C/C	C/T	G/G	T/T
2	D329		810	1	43	1	0	169	1.69	68	0	D329	D329	G/G	C/C	C/C	C/C	G/G	C/T
2	D330		811	1	61	0	0	170	1.7	77	1	D330	D330	G/G	C/C	C/T	C/C	G/G	C/C
2	D331		812	1	67	0	0	165	1.65	67	1	D331	D331	G/G	C/C	C/T	C/C	G/G	C/C
2	D332		813	1	57	0	0	165	1.65	50	0	D332	D332	G/A	C/C	C/C	C/T	G/C	T/T
2	D333		814	1	39	0	0	175	1.75	77	1	D333	D333	G/G	C/C	C/C	C/T	G/G	T/T
2	D335		815	1	63	0	0	165	1.65	59	0	D335	D335	G/G	C/C	C/C	C/C	G/G	C/C
2	D336		816	1	74	1	0	168	1.68	55	0	D336	D336	G/G	C/C	C/C	C/T	G/G	C/T
2	D337		817	1	76	0	0	160	1.6	62	1	D337	D337	G/G	G/C	C/T	C/T	G/G	C/T
2	D338		818	1	67	0	0	168	1.68	55	0	D338	D338	G/G	C/C	C/T	C/C	G/G	C/C
2	D339		819	1	61	0	0	170	1.7	65	0	D339	D339	G/G	C/C	C/C	C/C	G/G	T/T
2	D340		820	1	74	0	1	159	1.59	54	0	D340	D340	G/G	C/C	C/T	C/T	G/G	C/T
2	D341		821	2	65	0	0	158	1.58	60	1	D341	D341	G/G	C/C	T/T	C/T	G/G	C/C
2	D342		822	1	71	1	0	168	1.68	61	0	D342	D342	G/G	C/C	C/T	C/T	G/G	C/T
2	D343		823	1	59	1	0	165	1.65	48	0	D343	D343	G/G	C/C	C/C	C/C	G/G	C/C
2	D344		824	1	69	1	0	175	1.75	62	0	D344	D344	G/G	C/C	C/C	C/C	G/G	C/C
2	D345		825	2	78	0	0	164	1.64	56	0	D345	D345	G/A	C/C	C/C	C/C	G/C	T/T
2	D346		826	1	59	0	0	177	1.77	87	1	D346	D346	G/G	C/C	T/T	C/C	G/G	C/C
2	D347		827	1	63	1	0	171	1.71	75	1	D347	D347	G/G	C/C	C/C	C/C	G/G	T/T
2	D348		828	1	82	1	0	160	1.6	50	0	D348	D348	G/A	C/C	C/T	C/C	G/C	C/C
2	D349		829	2	63	0	0	160	1.6	63	1	D349	D349	G/G	C/C	C/T	C/T	G/G	C/C
2	D350		830	1	71	1	0	175	1.75	75	1	D350	D350	G/G	C/C	C/C	C/C	G/G	C/C
2	D351		831	1	64	0	1	172	1.72	65	0	D351	D351	G/G	C/C	C/C	C/C	G/G	C/C
2	D352		832	1	56	0	0	165	1.65	56	0	D352	D352	G/G	C/C	C/T	C/C	G/G	C/C
2	D353		833	2	72	0	0	165	1.65	68	1	D353	D353	G/G	C/C	C/C	C/T	G/G	C/T
2	D354		834	1	62	1	0	175	1.75	73	0	D354	D354	G/G	C/C	T/T	C/T	G/G	C/C
2	D355		835	2	51	0	0	158	1.58	50	0	D355	D355	G/G	C/C	C/T	C/T	G/G	C/C
2	D357		836	1	58	1	0	172	1.72	64	0	D357	D357	G/G	C/C	C/C	C/C	G/G	C/C
2	D358		837	1	60	0	0	165	1.65	61	0	D358	D358	G/G	C/C	C/C	C/C	G/G	C/T
2	D359		838	2	66	0	0	155	1.55	55	0	D359	D359	G/G	C/C	C/C	C/C	G/G	T/T
2	D360		839	2	70	0	0	158	1.58	55	0	D360	D360	G/G	C/C	C/T	C/T	G/G	C/C
2	D361		840	2	81	0	0	160	1.6	67	1	D361	D361	G/G	C/C	C/C	C/C	G/G	C/T
2	D362		841	1	57	0	0	175	1.75	80	1	D362	D362	G/G	C/C	C/T	C/C	G/G	C/T
2	D363		842	2	61	0	0	158	1.58	57	0	D363	D363	G/G	C/C	C/T	C/C	G/G	C/T
2	D364		843	2	59	0	0	160	1.6	52	0	D364	D364	G/G	C/C	C/T	C/T	G/G	C/T
2	D365		844	1	79	0	0	170	1.7	55	0	D365	D365	G/G	C/C	T/T	C/C	G/G	C/C
2	D366		845	2	54	0	0	161	1.61	62	0	D366	D366	G/G	C/C	C/C	C/C	G/G	C/T
2	D367		846	1	64	0	0	170	1.7	52	0	D367	D367	G/G	C/C	C/T	C/C	G/G	C/T
2	D368		847	2	48	0	0	155	1.55	62	1	D368	D368	G/A	C/C	C/T	C/C	G/C	C/C
2	D369		848	1	74	1	0	170	1.7	70	1	D369	D369	G/G	C/C	C/T	C/C	G/G	C/T
2	D370		849	1	63	1	0	170	1.7	68	0	D370	D370	G/G	C/C	C/C	T/T	G/G	T/T
2	D371		850	2	69	0	0	160	1.6	55	0	D371	D371	G/G	C/C	C/C	C/C	G/G	C/T
2	D372		851	2	74	0	0	153	1.53	65	1	D372	D372	G/G	C/C	C/T	C/T	G/G	C/C
2	D373		852	1	59	0	0	165	1.65	70	1	D373	D373	G/A	C/C	C/C	C/T	G/C	C/T
2	D374		853	2	63	0	0	153	1.53	69	1	D374	D374	G/G	C/C	C/T	C/C	G/G	C/C
2	D375		854	1	73	0	0	167	1.67	92	1	D375	D375	G/G	C/C	C/T	C/C	G/G	C/T
2	D376		855	2	68	0	0	155	1.55	55	0	D376	D376	G/G	C/C	C/C	C/C	G/G	C/T
2	D377		856	1	76	0	0	162	1.62	62	0	D377	D377	G/G	C/C	C/C	C/T	G/G	C/T
2	D378		857	1	65	0	0	168	1.68	66	0	D378	D378	G/G	C/C	C/C	C/T	G/G	T/T
2	D379		858	1	73	0	0	170	1.7	72	1	D379	D379	G/A	C/C	T/T	C/T	G/C	C/C
2	D380		859	2	59	0	0	165	1.65	54	0	D380	D380	G/G	C/C	C/T	C/T	G/G	C/C
2	D381		860	1	65	1	0	150	1.5	50	0	D381	D381	G/A	G/C	C/C	T/T	G/C	C/T
2	D382		861	1	66	0	0	162	1.62	54	0	D382	D382	G/G	C/C	C/T	C/T	G/G	C/C
2	D383		862	2	67	0	0	150	1.5	45	0	D383	D383	G/G	C/C	C/T	C/C	G/G	C/C
2	D384		863	2	55	0	0	163	1.63	50	0	D384	D384	G/G	C/C	T/T	C/C	G/G	C/C
2	D385		864	1	78	0	0	168	1.68	71	1	D385	D385	G/G	C/C	T/T	C/C	G/G	C/C
2	D386		865	1	71	0	0	160	1.6	63	1	D386	D386	G/G	C/C	C/C	C/C	G/G	T/T
2	D387		866	2	67	0	0	160	1.6	55	0	D387	D387	G/G	C/C	C/C	C/C	G/G	C/T
2	D388		867	1	53	0	0	168	1.68	68	1	D388	D388	G/A	G/C	C/T	C/T	G/G	C/T
2	D389		868	2	67	0	0	160	1.6	67	1	D389	D389	G/G	C/C	C/C	C/C	G/G	T/T
2	D390		869	2	68	0	0	160	1.6	65	1	D390	D390	G/G	C/C	C/T	C/T	G/G	C/T
2	D391		870	2	82	0	0	162	1.62	60	0	D391	D391	G/G	C/C	C/C	C/T	G/G	C/T
2	D392		871	1	55	1	0	175	1.75	70	0	D392	D392	G/G	C/C	C/T	C/C	G/G	C/C
2	D393		872	2	63	0	0	163	1.63	80	1	D393	D393	G/A	C/C	C/T	C/C	G/C	C/C
2	D394		873	1	38	0	0	167	1.67	73	1	D394	D394	G/G	C/C	C/C	C/T	G/G	C/T
2	D395		874	2	72	0	0	159	1.59	60	0	D395	D395	G/G	C/C	C/C	C/T	G/G	C/T
2	D396		875	1	56	1	0	170	1.7	70	1	D396	D396	G/G	C/C	T/T	C/C	G/G	C/C
2	D397		876	1	80	0	0	170	1.7	64	0	D397	D397	G/G	C/C	C/T	C/C	G/G	C/T
2	D398		877	1	56	0	0	168	1.68	68	1	D398	D398	G/G	C/C	C/T	C/T	G/G	C/T
2	D399		878	1	65	0	0	168	1.68	64	0	D399	D399	G/A	C/C	C/T	C/C	G/C	C/T
2	D400		879	1	59	0	0	170	1.7	70	1	D400	D400	G/G	C/C	C/C	C/T	G/G	C/T
2	D401		880	1	72	0	0	169	1.69	67.5	0	D401	D401	G/G	C/C	C/C	C/C	G/G	C/T
2	D402		881	1	59	1	0	175	1.75	87	1	D402	D402	G/G	C/C	C/T	C/T	G/G	C/C
2	D403		882	1	77	1	0	153	1.53	49	0	D403	D403	G/G	C/C	C/C	C/C	G/G	C/T
2	D404		883	1	60	0	0	168	1.68	63	0	D404	D404	G/G	C/C	C/C	C/T	G/G	T/T
2	D405		884	1	56	1	0	165	1.65	59	0	D405	D405	G/G	C/C	C/C	T/T	G/G	C/C
2	D406		885	1	49	0	0	160	1.6	51	0	D406	D406	G/G	C/C	C/C	C/T	G/G	T/T
2	D407		886	1	62	0	0	167	1.67	56	0	D407	D407	G/A	G/C	C/T	T/T	G/C	C/C
2	D408		887	2	68	0	0	162	1.62	59	0	D408	D408	G/G	C/C	C/C	C/C	G/G	T/T
2	D409		888	1	70	1	0	162	1.62	80	1	D409	D409	G/G	C/C	C/T	C/T	G/G	C/C
2	D410		889	2	65	0	0	160	1.6	74	1	D410	D410	G/G	C/C	C/C	C/C	G/G	C/T
2	D411		890	2	77	0	0	153	1.53	80	1	D411	D411	G/G	C/C	C/T	C/T	G/G	C/C
2	D412		891	1	49	1	0	170	1.7	60	0	D412	D412	G/A	C/C	C/T	C/C	G/C	C/C
2	D413		892	1	71	1	0	175	1.75	80	1	D413	D413	G/G	C/C	C/C	C/T	G/G	T/T
2	D414		893	1	52	0	0	168	1.68	55	0	D414	D414	G/G	C/C	C/C	C/T	G/G	C/T
2	D416		894	1	47	0	0	173	1.73	61	0	D416	D416	G/G	G/C	C/C	C/T	G/G	C/T
2	D417		895	1	48	0	0	173	1.73	74	1	D417	D417	G/G	C/C	C/C	C/T	G/G	C/C
2	D418		896	2	46	0	0	150	1.5	52	0	D418	D418	G/G	C/C	C/C	C/C	G/G	T/T
2	D419		897	2	51	0	0	150	1.5	51	0	D419	D419	G/G	C/C	C/C	C/C	G/G	T/T
2	D420		898	1	67	1	0	175	1.75	75	1	D420	D420	G/G	C/C	C/C	C/C	G/G	T/T
2	D421		899	1	78	0	0	160	1.6	59	0	D421	D421	G/G	C/C	C/T	C/T	G/G	C/T
2	D422		900	1	48	1	0	170	1.7	67	0	D422	D422	G/A	C/C	C/C	C/C	G/C	T/T
2	D423		901	2	56	0	0	160	1.6	58	0	D423	D423	G/A	G/C	C/C	C/T	G/C	C/C
2	D424		902	2	51	0	0	170	1.7	70	1	D424	D424	G/G	C/C	C/C	C/C	G/G	C/T
2	D425		903	1	82	0	0	168	1.68	75	1	D425	D425	G/G	C/C	C/T	C/C	G/G	C/C
2	D426		904	2	63	0	0	158	1.58	70	1	D426	D426	G/G	C/C	T/T	C/T	G/G	C/C
2	D427		905	2	54	0	0	158	1.58	65	1	D427	D427	G/G	C/C	C/C	C/C	G/G	C/T
2	D428		906	2	52	0	0	167	1.67	67	1	D428	D428	G/G	G/C	C/C	C/T	G/G	T/T
2	D429		907	1	52	0	0	170	1.7	70	1	D429	D429	G/G	C/C	C/C	C/C	G/G	C/T
2	D430		908	1	58	1	0	170	1.7	65	0	D430	D430	G/G	C/C	C/C	C/T	G/G	C/T
2	D431		909	1	78	0	0	169	1.69	68	0	D431	D431	G/G	C/C	C/T	C/C	G/G	C/C
2	D432		910	1	51	0	0	166	1.66	64	0	D432	D432	G/G	C/C	C/C	C/C	G/G	T/T
2	D433		911	2	68	0	0	152	1.52	68	1	D433	D433	G/G	C/C	C/C	C/C	G/G	C/C
2	D434		912	1	52	0	0	172	1.72	71	0	D434	D434	G/G	C/C	C/C	C/C	G/G	T/T
2	D435		913	2	51	0	0	160	1.6	82	1	D435	D435	G/G	C/C	C/C	C/C	G/G	T/T
2	D436		914	2	66	0	0	158	1.58	63	1	D436	D436	G/G	C/C	C/C	C/T	G/G	C/C
2	D437		915	2	62	0	0	153	1.53	51	0	D437	D437	G/G	C/C	C/T	C/C	G/G	C/C
2	D438		916	1	66	0	0	168	1.68	66	0	D438	D438	G/A	C/C	C/C	C/T	G/C	C/T
2	D439		917	1	65	0	0	175	1.75	75	1	D439	D439	G/G	C/C	C/T	C/C	G/G	C/T
2	D440		918	2	60	0	0	152	1.52	47	0	D440	D440	G/G	C/C	C/C	C/T	G/G	T/T
2	D441		919	1	48	0	0	164	1.64	65	1	D441	D441	G/G	C/C	C/C	C/C	G/G	C/C
2	D442		920	2	53	0	0	168	1.68	68	1	D442	D442	G/G	C/C	C/C	C/C	G/G	C/T
2	D443		921	1	70	1	0	158	1.58	62	1	D443	D443	G/G	C/C	C/C	C/C	G/G	C/C
2	D444		922	2	60	0	0	164	1.64	69	1	D444	D444	G/G	C/C	C/T	C/T	G/G	C/C
2	D445		923	2	63	0	0	162	1.62	59	0	D445	D445	G/G	C/C	C/C	C/T	G/G	C/T
2	D446		924	2	61	0	0	160	1.6	70	1	D446	D446	G/A	C/C	C/T	C/T	G/C	C/T
2	D447		925	1	78	1	0	155	1.55	55	0	D447	D447	G/G	G/C	C/T	C/T	G/G	C/T
2	D448		926	1	55	0	0	169	1.69	68	0	D448	D448	G/G	C/C	C/C	C/T	G/G	C/T
2	D449		927	1	69	0	0	165	1.65	68	1	D449	D449	G/G	C/C	C/C	C/C	G/G	T/T
2	D450		928	1	67	0	0	175	1.75	75	1	D450	D450	G/G	C/C	C/T	C/T	G/G	C/C
2	D451		929	1	62	0	0	173	1.73	70	0	D451	D451	G/G	C/C	C/C	C/C	G/G	T/T
2	D452		930	2	49	0	0	154	1.54	45	0	D452	D452	G/G	C/C	C/C	C/C	G/G	C/T
2	D453		931	1	55	0	0	170	1.7	73	1	D453	D453	G/G	C/C	C/C	C/T	G/G	C/T
2	D454		932	1	62	1	0	165	1.65	61	0	D454	D454	G/G	C/C	C/T	C/T	G/G	C/C
2	D455		933	1	48	1	0	170	1.7	74	1	D455	D455	G/G	C/C	C/T	C/T	G/G	C/C
2	D456		934	1	49	1	0	170	1.7	85	1	D456	D456	G/A	C/C	C/C	C/C	G/C	T/T
2	D457		935	1	61	0	0	169	1.69	73	1	D457	D457	G/G	C/C	C/C	C/C	G/G	T/T
2	D458		936	2	77	0	0	158	1.58	65	1	D458	D458	G/G	C/C	C/C	C/T	G/G	C/T
2	D459		937	2	53	0	0	165	1.65	49	0	D459	D459	G/G	C/C	T/T	C/T	G/G	C/C
2	D460(????)		938	1	69	1	0	168	1.68	53	0	D460(????)	D460	G/G	C/C	C/C	C/C	G/G	C/C
2	D461(???)		939	2	70	0	0	160	1.6	63	1	D461(???)	D461	G/G	C/C	C/T	C/T	G/G	C/C
2	D462		940	1	52	0	0	160	1.6	58	0	D462	D462	G/G	C/C	C/T	C/C	G/G	C/T
2	D463(??)		941	2	61	0	0	162	1.62	60	0	D463(??)	D463	G/A	C/C	C/C	C/T	G/C	T/T
2	D464		942	2	67	0	0	165	1.65	64	0	D464	D464	G/G	C/C	C/C	C/C	G/G	T/T
2	D465		943	1	30	0	0	170	1.7	62	0	D465	D465	G/G	C/C	C/C	C/C	G/G	T/T
2	D466		944	1	58	0	0	160	1.6	56	0	D466	D466	G/A	C/C	C/T	C/C	G/C	C/T
2	D467		945	2	61	0	0	158	1.58	60.5	1	D467	D467	G/A	C/C	C/C	C/C	G/C	C/T
2	D468		946	1	75	0	0	169	1.69	67	0	D468	D468	G/G	C/C	C/C	C/T	G/G	C/C
2	D469		947	1	54	0	0	167	1.67	61	0	D469	D469	G/A	C/C	C/T	C/T	G/C	C/C
2	D470		948	2	42	0	0	158	1.58	56	0	D470	D470	G/G	C/C	C/T	C/T	G/G	C/T
2	D471		949	2	61	0	0	160	1.6	44	0	D471	D471	G/G	C/C	C/T	C/C	G/G	C/C
2	D473		950	1	57	0	0	167	1.67	55	0	D473	D473	G/G	C/C	C/T	C/C	G/G	C/C
2	D474		951	1	50	1	0	165	1.65	66	1	D474	D474	G/G	C/C	C/C	C/T	G/G	C/T
2	D475		952	2	66	0	0	158	1.58	55	0	D475	D475	G/G	C/C	C/C	C/C	G/G	C/T
2	D476		953	1	55	1	0	167	1.67	70	1	D476	D476	G/G	C/C	T/T	C/C	G/G	C/C
2	D477		954	2	52	0	0	160	1.6	66	1	D477	D477	G/G	C/C	T/T	C/C	G/G	C/C
2	D478		955	1	41	0	0	169	1.69	68	0	D478	D478	G/G	C/C	C/C	C/C	G/G	C/T
2	D479		956	2	63	0	0	150	1.5	65	1	D479	D479	G/A	C/C	C/C	C/C	G/C	C/C
2	D480		957	1	59	0	0	176	1.76	85	1	D480	D480	G/G	C/C	C/C	C/C	G/G	C/T
2	D481		958	1	74	1	1	175	1.75	64	0	D481	D481	G/G	C/C	C/C	C/C	G/G	C/T
2	D482		959	1	68	0	0	172	1.72	69	0	D482	D482	G/G	C/C	C/C	C/C	G/G	T/T
2	D483		960	1	63	1	1	165	1.65	69	1	D483	D483	G/G	C/C	C/C	C/C	G/G	T/T
2	D484		961	1	60	1	0	170	1.7	53	0	D484	D484	A/A	C/C	C/C	C/C	G/C	T/T
2	D485		962	1	59	0	0	167	1.67	71	1	D485	D485	G/G	C/C	C/C	C/C	G/G	C/T
2	D486		963	2	57	0	0	160	1.6	64	1	D486	D486	G/G	G/C	C/C	T/T	G/G	C/T
2	D487		964	1	60	1	0	168	1.68	90	1	D487	D487	G/G	C/C	C/C	C/C	G/G	T/T
2	D488		965	2	42	0	0	167	1.67	63	0	D488	D488	G/G	C/C	C/T	C/C	G/G	C/T
2	D489		966	1	54	1	0	178	1.78	70	0	D489	D489	G/G	C/C	C/T	C/C	G/G	C/T
2	D490		967	2	42	0	0	163	1.63	68	1	D490	D490	G/G	C/C	C/C	C/T	G/G	T/T
2	D491		968	1	51	0	0	172	1.72	56	0	D491	D491	G/G	C/C	C/T	C/C	G/G	C/C
2	D492		969	1	50	0	0	175	1.75	78	1	D492	D492	G/G	C/C	C/C	C/C	G/G	T/T
2	D493		970	1	58	0	0	167	1.67	67	1	D493	D493	G/G	C/C	C/C	C/T	G/G	T/T
2	D494		971	2	65	1	0	150	1.5	69	1	D494	D494	G/A	C/C	C/C	C/C	G/C	C/T
2	D495		972	2	73	0	0	155	1.55	54	0	D495	D495	G/G	C/C	C/C	C/T	G/G	T/T
2	D496		973	1	51	0	0	168	1.68	50	0	D496	D496	G/G	C/C	C/T	C/T	G/G	C/T
2	D497		974	1	64	0	0	165	1.65	67	1	D497	D497	G/G	C/C	C/C	C/T	G/G	C/T
2	D498		975	1	27	0	0	177	1.77	63	0	D498	D498	G/G	C/C	C/T	C/T	G/G	C/C
2	D499		976	1	63	1	0	168	1.68	60	0	D499	D499	G/G	C/C	C/C	C/C	G/G	T/T
2	D500		977	1	53	1	0	170	1.7	60	0	D500	D500	G/G	C/C	C/C	C/C	G/G	C/T
2	D501		978	2	64	0	0	160	1.6	55	0	D501	D501	G/G	C/C	C/T	C/C	G/G	C/T
2	D502		979	1	55	1	0	173	1.73	64	0	D502	D502	G/A	C/C	C/C	C/T	G/C	C/T
2	D503		980	1	39	1	0	169	1.69	68	0	D503	D503	G/G	C/C	C/T	C/T	G/G	C/C
2	D504		981	1	69	0	0	162	1.62	71	1	D504	D504	G/G	G/C	C/C	C/T	G/G	C/T
2	D505		982	1	50	1	0	168	1.68	50	0	D505	D505	G/G	G/C	C/T	C/T	G/G	C/T
2	D506		983	1	76	1	0	170	1.7	67	0	D506	D506	G/G	C/C	T/T	C/C	G/G	C/C
2	D507		984	1	79	1	0	175	1.75	70	0	D507	D507	G/G	G/C	C/T	C/T	G/G	C/C
2	D508		985	1	52	1	0	167	1.67	65	0	D508	D508	G/G	C/C	C/T	C/C	G/G	C/T
2	D509		986	2	79	0	0	162	1.62	65	1	D509	D509	G/G	C/C	C/C	C/C	G/G	C/T
2	D510		987	2	58	0	0	158	1.58	70	1	D510	D510	G/G	C/C	C/C	C/C	G/G	C/T
2	D511		988	1	43	0	0	173	1.73	59	0	D511	D511	G/G	C/C	C/C	C/T	G/G	C/T
2	D512		989	2	53	0	0	163	1.63	55	0	D512	D512	G/G	C/C	C/C	C/C	G/G	T/T
2	D513		990	2	71	0	0	155	1.55	62	1	D513	D513	G/G	C/C	C/C	C/C	G/G	C/T
2	D514		991	1	78	0	0	170	1.7	59	0	D514	D514	G/G	C/C	C/C	T/T	G/G	C/C
2	D515		992	1	63	1	0	158	1.58	57	0	D515	D515	G/G	C/C	C/C	C/C	G/G	C/T
2	D516		993	1	57	1	0	165	1.65	68	1	D516	D516	G/G	C/C	C/C	C/C	G/G	C/T
2	D517		994	2	60	0	0	162	1.62	59	0	D517	D517	G/G	C/C	C/C	C/T	G/G	C/T
2	D518		995	1	67	0	0	165	1.65	72	1	D518	D518	G/G	C/C	C/C	C/T	G/G	C/T
2	D519		996	1	66	0	0	163	1.63	71	1	D519	D519	G/G	C/C	C/C	C/T	G/G	C/T
2	D520		997	1	62	0	0	170	1.7	72	1	D520	D520	G/A	C/C	C/T	C/C	G/C	C/T
2	D521		998	2	61	0	0	159	1.59	64	1	D521	D521	G/G	C/C	C/C	C/C	G/G	C/T
2	D522		999	1	61	1	0	177	1.77	79	1	D522	D522	G/G	C/C	C/T	C/C	G/G	C/T
2	D523		1000	1	66	0	0	166	1.66	69	1	D523	D523	G/G	C/C	C/C	C/C	G/G	C/T
2	D524		1001	1	52	0	0	176	1.76	82	1	D524	D524	G/G	C/C	C/C	C/C	G/G	T/T
2	D525		1002	2	71	0	0	159	1.59	65	1	D525	D525	G/G	C/C	C/C	C/C	G/G	T/T
2	D526		1003	2	73	0	0	157	1.57	60	1	D526	D526	G/G	G/C	C/C	C/T	G/G	T/T
2	D527		1004	1	60	1	0	165	1.65	55	0	D527	D527	G/G	C/C	C/C	C/T	G/G	C/C
2	D528		1005	1	72	1	1	170	1.7	60	0	D528	D528	G/G	C/C	C/T	C/C	G/G	C/C
2	D529		1006	1	70	0	0	164	1.64	59	0	D529	D529	G/G	C/C	C/C	C/C	G/G	C/C
2	D530		1007	1	68	0	0	169	1.69	68	0	D530	D530	G/G	C/C	C/T	C/C	G/G	C/T
2	D531		1008	1	71	1	0	165	1.65	55	0	D531	D531	G/G	C/C	C/C	C/T	G/G	C/T
2	D532		1009	2	69	0	0	160	1.6	67	1	D532	D532	G/A	C/C	C/C	C/C	G/C	C/T
2	D533		1010	2	61	0	0	158	1.58	61	1	D533	D533	G/G	G/C	C/C	T/T	G/G	C/T
2	D534		1011	1	69	0	0	170	1.7	70	1	D534	D534	G/G	C/C	C/T	C/C	G/G	C/T
2	D535		1012	1	74	1	0	170	1.7	70	1	D535	D535	G/A	C/C	C/T	C/C	G/C	C/T
2	D536		1013	2	52	0	0	158	1.58	70	1	D536	D536	G/G	C/C	C/C	T/T	G/G	C/T
2	D537		1014	1	41	0	0	169	1.69	60	0	D537	D537	G/G	C/C	C/C	C/T	G/G	T/T
2	D538		1015	1	52	0	0	160	1.6	60	0	D538	D538	G/G	C/C	C/C	C/T	G/G	T/T
2	D539		1016	2	44	0	0	165	1.65	59	0	D539	D539	G/G	C/C	C/C	C/C	G/G	C/T
2	D540		1017	2	50	0	0	163	1.63	60	0	D540	D540	A/A	C/C	C/C	C/C	C/C	T/T
2	D541		1018	1	63	0	0	165	1.65	70	1	D541	D541	G/G	C/C	C/T	C/C	G/G	C/T
2	D542		1019	1	59	1	0	164	1.64	66	1	D542	D542	G/G	C/C	C/T	C/C	G/G	C/C
2	D543		1020	1	44	0	0	176	1.76	75	1	D543	D543	G/G	C/C	T/T	C/C	G/G	C/C
2	D544		1021	2	66	0	0	160	1.6	59	0	D544	D544	G/G	G/C	C/C	T/T	G/G	C/T
2	D545		1022	1	59	1	1	170	1.7	59	0	D545	D545	G/G	C/C	C/C	C/C	G/G	T/T
2	D546		1023	1	61	1	0	158	1.58	60	1	D546	D546	G/G	C/C	C/T	C/C	G/G	C/C
2	D547		1024	2	53	0	0	166	1.66	71	1	D547	D547	G/G	C/C	C/C	C/T	G/G	C/T
2	D548		1025	1	66	1	0	172	1.72	87	1	D548	D548	G/G	C/C	C/T	C/T	G/G	C/T
2	D550		1026	2	54	0	0	163	1.63	56	0	D550	D550	G/G	C/C	C/T	C/C	G/G	C/T
2	D551		1027	2	51	0	0	161	1.61	67	1	D551	D551	G/A	C/C	C/C	C/T	G/C	C/C
2	D552		1028	2	61	0	0	158	1.58	56	0	D552	D552	G/G	C/C	C/C	C/T	G/G	T/T
2	D553		1029	1	56	0	0	165	1.65	66	1	D553	D553	G/G	C/C	C/C	C/C	G/G	T/T
2	D554		1030	1	52	0	0	165	1.65	70	1	D554	D554	G/G	G/C	T/T	C/T	G/G	C/C
2	D555		1031	2	49	0	0	166	1.66	70	1	D555	D555	G/G	C/C	C/C	C/C	G/G	C/T
2	D556		1032	2	48	0	0	163	1.63	60	0	D556	D556	G/G	C/C	C/C	C/C	G/G	C/T
2	D557		1033	2	45	0	0	157	1.57	66	1	D557	D557	G/G	C/C	C/C	C/T	G/G	C/T
2	D558		1034	2	47	0	0	155	1.55	55	0	D558	D558	G/G	C/C	C/C	C/C	G/G	C/T
2	D559		1035	2	65	0	0	158	1.58	65	1	D559	D559	G/G	C/C	C/C	C/C	G/G	T/T
2	D560		1036	1	73	1	0	158	1.58	45	0	D560	D560	G/G	G/C	C/T	C/C	G/G	C/T
2	D561		1037	2	59	0	0	155	1.55	55	0	D561	D561	G/A	C/C	C/C	C/T	G/C	C/T
2	D562		1038	1	59	0	0	165	1.65	61	0	D562	D562	G/G	C/C	C/T	C/C	G/G	C/T
2	D563		1039	1	79	0	0	170	1.7	78	1	D563	D563	G/G	C/C	C/T	C/C	G/G	C/C
2	D564		1040	1	67	0	0	170	1.7	54	0	D564	D564	G/G	C/C	C/C	C/C	G/G	C/T
2	D565		1041	1	78	0	0	170	1.7	60	0	D565	D565	G/G	C/C	C/C	C/C	G/G	C/T
2	D566		1042	1	59	0	0	160	1.6	70	1	D566	D566	G/G	C/C	C/C	C/C	G/G	C/T
2	D567		1043	1	71	0	0	173	1.73	64	0	D567	D567	G/G	G/C	C/C	C/T	G/G	C/T
2	D568		1044	1	59	0	0	170	1.7	70	1	D568	D568	G/G	C/C	C/C	C/C	G/G	C/T
2	D569		1045	1	47	1	0	164	1.64	68	1	D569	D569	G/G	G/C	C/T	C/T	G/G	C/T
2	D570		1046	2	68	0	0	155	1.55	47	0	D570	D570	G/G	C/C	C/C	C/C	G/G	C/T
2	D571		1047	1	64	0	1	160	1.6	55	0	D571	D571	G/G	C/C	C/T	C/T	G/G	C/T
2	D572		1048	2	50	0	0	158	1.58	60	1	D572	D572	G/A	C/C	C/C	C/T	G/C	C/C
2	D573		1049	1	74	1	0	153	1.53	55	0	D573	D573	G/G	G/C	C/T	C/C	G/G	C/C
2	D574		1050	2	50	0	0	155	1.55	50	0	D574	D574	G/G	C/C	C/C	C/C	G/G	C/T
2	D575		1051	1	70	0	0	165	1.65	65	0	D575	D575	G/A	G/C	C/T	T/T	G/C	C/T
2	D576		1052	2	73	0	0	163	1.63	65	1	D576	D576	G/G	C/C	C/C	C/C	G/G	T/T
2	D577		1053	1	82	0	0	168	1.68	60	0	D577	D577	G/G	C/C	C/C	C/C	G/G	T/T
2	D578		1054	2	63	0	0	160	1.6	49	0	D578	D578	G/A	C/C	C/C	C/C	G/C	C/T
2	D579		1055	1	53	0	0	165	1.65	64	0	D579	D579	G/G	C/C	C/C	C/C	G/G	T/T
2	D580		1056	2	59	0	0	158	1.58	55	0	D580	D580	G/G	C/C	C/C	C/C	G/G	C/C
2	D581		1057	1	58	0	0	175	1.75	69	0	D581	D581	G/G	C/C	C/C	C/T	G/G	C/T
2	D582		1058	1	68	0	0	168	1.68	48	0	D582	D582	G/G	C/C	C/T	C/T	G/G	C/T
2	D583		1059	2	53	0	0	158	1.58	61	1	D583	D583	G/G	G/C	C/T	C/T	G/G	C/T
2	D584		1060	2	65	0	0	163	1.63	66	1	D584	D584	G/G	C/C	C/C	C/T	G/G	C/T
2	D585		1061	2	73	0	0	150	1.5	60	1	D585	D585	G/A	G/C	C/C	C/C	G/C	C/T
2	D586		1062	1	73	1	0	172	1.72	67	0	D586	D586	G/G	C/C	C/C	C/C	G/G	T/T
2	D587		1063	1	77	1	0	174	1.74	75	1	D587	D587	G/G	C/C	C/C	C/T	G/G	T/T
2	D588		1064	2	56	0	0	160	1.6	62	1	D588	D588	G/G	C/C	C/T	C/C	G/G	C/C
2	D589		1065	1	59	0	0	170	1.7	67	0	D589	D589	G/G	C/C	C/C	C/C	G/G	T/T
2	D590		1066	2	51	0	0	159	1.59	66	1	D590	D590	G/G	C/C	C/T	C/C	G/G	C/T
2	D591		1067	1	62	0	0	163	1.63	70	1	D591	D591	G/G	C/C	C/C	C/T	G/G	C/T
2	D592		1068	1	55	0	0	165	1.65	62	0	D592	D592	G/G	C/C	C/C	C/C	G/G	C/T
2	D593		1069	2	59	0	0	155	1.55	70	1	D593	D593	G/G	C/C	C/T	C/C	G/G	C/C
2	D594		1070	1	62	0	0	172	1.72	72	1	D594	D594	G/A	C/C	C/C	C/C	G/C	C/T
2	D595		1071	1	69	0	0	174	1.74	62	0	D595	D595	G/G	C/C	C/T	C/C	G/G	C/C
2	D596		1072	1	74	0	0	160	1.6	40	0	D596	D596	G/G	C/C	C/C	C/C	G/G	C/C
2	D597		1073	1	29	0	0	170	1.7	80	1	D597	D597	G/G	C/C	C/T	C/T	G/G	C/C
2	D598		1074	1	59	0	0	160	1.6	59	0	D598	D598	G/G	C/C	C/C	C/T	G/G	C/C
2	D599		1075	1	70	0	0	172	1.72	83	1	D599	D599	G/G	C/C	C/C	C/C	G/G	C/T
2	D600		1076	1	52	1	0	175	1.75	70	0	D600	D600	G/G	C/C	C/C	C/T	G/G	C/T
2	D602		1077	1	60	0	0	175	1.75	75	1	D602	D602	G/G	C/C	C/T	C/C	G/G	C/T
2	D603		1078	2	61	0	0	154	1.54	52	0	D603	D603	G/G	C/C	C/T	C/T	G/G	C/C
2	D604		1079	1	69	1	0	178	1.78	80	1	D604	D604	G/G	C/C	C/T	C/T	G/G	C/C
2	D605		1080	2	77	0	0	158	1.58	70	1	D605	D605	G/G	C/C	C/T	C/C	G/G	C/T
2	D606		1081	2	72	0	0	170	1.7	64	0	D606	D606	G/G	C/C	T/T	C/C	G/G	C/C
2	D607		1082	2	77	0	0	158	1.58	59	0	D607	D607	G/G	G/C	C/C	T/T	G/G	C/C
2	D608		1083	2	69	0	0	163	1.63	72	1	D608	D608	G/G	C/C	C/C	C/T	G/G	T/T
2	D609		1084	1	59	0	0	165	1.65	68	1	D609	D609	G/G	C/C	C/C	C/C	G/G	T/T
2	D610		1085	2	63	0	0	168	1.68	73	1	D610	D610	G/G	C/C	C/T	C/C	G/G	C/T
2	D611		1086	2	66	0	0	157	1.57	50	0	D611	D611	G/G	C/C	C/C	C/C	G/G	C/T
2	D612		1087	1	63	0	0	170	1.7	78	1	D612	D612	G/G	C/C	C/C	C/T	G/G	T/T
2	D613		1088	1	76	0	0	170	1.7	53	0	D613	D613	G/A	C/C	C/C	C/C	G/C	C/C
2	D614		1089	1	74	0	0	172	1.72	73	1	D614	D614	G/G	C/C	C/C	C/C	G/G	C/T
2	D615		1090	2	59	0	0	165	1.65	70	1	D615	D615	G/G	C/C	C/C	C/C	G/G	C/T
2	D616		1091	1	73	1	0	175	1.75	90	1	D616	D616	G/G	C/C	C/C	C/C	G/G	C/T
2	D617		1092	1	57	0	0	170	1.7	85	1	D617	D617	G/G	C/C	C/C	C/T	G/G	C/C
2	D618		1093	2	72	0	0	153	1.53	57	1	D618	D618	G/G	C/C	C/C	C/T	G/G	C/T
2	D619		1094	1	63	0	0	169	1.69	68	0	D619	D619	G/A	C/C	C/C	C/C	G/C	C/C
2	D620		1095	2	68	0	0	170	1.7	100	1	D620	D620	G/G	C/C	C/T	C/C	G/G	C/T
2	D621		1096	2	79	0	0	155	1.55	65	1	D621	D621	G/G	C/C	C/C	C/C	G/G	C/C
2	D622		1097	1	76	0	0	170	1.7	70	1	D622	D622	G/G	G/C	C/C	C/C	G/G	C/T
2	D623		1098	1	66	0	0	166	1.66	69	1	D623	D623	G/A	C/C	C/T	C/C	G/C	C/T
2	D624		1099	1	61	1	0	160	1.6	65	1	D624	D624	G/G	C/C	C/C	C/C	G/G	T/T
2	D625		1100	1	53	0	0	174	1.74	85	1	D625	D625	G/G	C/C	C/C	C/C	G/G	C/C
2	D626		1101	2	58	0	0	161	1.61	62	0	D626	D626	G/G	C/C	C/T	C/C	G/G	C/C
2	D627		1102	2	78	0	0	155	1.55	61	1	D627	D627	G/G	C/C	C/T	C/C	G/G	C/C
2	D628		1103	1	62	0	0	164	1.64	76	1	D628	D628	G/G	G/C	C/T	C/C	G/G	C/C
2	D629		1104	2	66	0	0	158	1.58	60	1	D629	D629	G/G	C/C	C/T	C/T	G/G	C/C
2	D630		1105	1	69	1	0	173	1.73	59	0	D630	D630	G/G	C/C	C/T	T/T	G/G	C/T
2	D631		1106	1	73	0	0	163	1.63	60	0	D631	D631	G/G	C/C	C/C	C/C	G/G	C/T
2	D632		1107	1	76	1	0	150	1.5	50	0	D632	D632	G/G	G/C	C/C	C/T	G/G	T/T
2	D633		1108	1	57	1	0	178	1.78	75	0	D633	D633	G/G	C/C	C/T	C/C	G/G	C/T
2	D634		1109	1	57	1	0	167	1.67	79	1	D634	D634	G/G	C/C	C/C	C/T	G/G	T/T
2	D635		1110	1	46	1	1	161	1.61	72	1	D635	D635	G/G	G/C	C/C	C/T	G/G	C/T
2	D636		1111	2	73	0	0	160	1.6	65	1	D636	D636	G/G	C/C	C/T	T/T	G/G	C/T
2	D637		1112	1	60	1	1	168	1.68	63	0	D637	D637	G/G	C/C	C/T	C/C	G/G	C/C
2	D638		1113	2	65	0	0	156	1.56	54	0	D638	D638	G/G	G/C	C/T	C/T	G/G	C/T
2	D639		1114	1	66	1	0	168	1.68	58	0	D639	D639	G/G	C/C	C/T	C/C	G/G	C/C
2	D640		1115	1	62	0	0	168	1.68	60	0	D640	D640	G/A	C/C	C/C	C/C	G/C	C/T
2	D642		1116	2	71	0	0	160	1.6	55	0	D642	D642	G/G	C/C	C/C	C/C	G/G	C/C
2	D643		1117	2	74	0	0	158	1.58	55	0	D643	D643	G/G	C/C	C/T	T/T	G/G	C/T
2	D644		1118	2	74	0	0	150	1.5	63	1	D644	D644	G/G	C/C	C/T	C/C	G/G	C/T
2	D645		1119	2	71	0	0	153	1.53	53	0	D645	D645	A/A	C/C	C/T	C/T	C/C	C/T
2	D646		1120	1	71	1	0	183	1.83	93	1	D646	D646	G/G	C/C	C/T	C/C	G/G	C/T
2	D647		1121	1	54	1	0	170	1.7	60	0	D647	D647	G/G	C/C	C/T	C/C	G/G	C/C
2	D648		1122	1	78	0	0	166	1.66	60	0	D648	D648	G/G	C/C	C/C	C/C	G/G	C/T
2	D649		1123	1	53	0	0	172	1.72	67	0	D649	D649	G/A	C/C	C/C	C/C	G/C	C/T
2	D650		1124	2	64	0	0	166	1.66	85	1	D650	D650	G/G	C/C	C/C	C/C	G/G	C/T
2	D651		1125	2	71	0	0	158	1.58	60	1	D651	D651	G/A	C/C	C/C	C/C	G/C	T/T
2	D652		1126	2	68	0	0	158	1.58	60	1	D652	D652	G/A	C/C	C/T	T/T	G/C	C/T
2	D653		1127	1	64	1	1	172	1.72	73	1	D653	D653	G/G	C/C	C/C	C/C	G/G	C/T
2	D654		1128	1	55	0	0	160	1.6	64	1	D654	D654	G/G	C/C	C/C	C/C	G/G	C/C
2	D655		1129	2	60	0	0	150	1.5	45	0	D655	D655	G/G	C/C	C/T	C/C	G/G	C/C
2	D656		1130	1	73	1	0	157	1.57	60	1	D656	D656	G/G	C/C	C/C	C/C	G/G	C/T
2	D657		1131	1	68	0	0	160	1.6	55	0	D657	D657	G/G	C/C	C/C	C/T	G/G	T/T
2	D658		1132	1	75	1	0	160	1.6	61	0	D658	D658	G/A	C/C	C/T	C/C	G/C	C/C
2	D659		1133	1	79	0	0	170	1.7	69	0	D659	D659	G/A	C/C	C/C	C/C	G/C	T/T
2	D660		1134	1	59	1	0	160	1.6	53	0	D660	D660	G/G	C/C	C/T	C/C	G/G	C/T
2	D661		1135	1	76	0	0	161	1.61	73	1	D661	D661	G/G	C/C	C/C	C/T	G/G	C/T
2	D662		1136	1	59	1	0	165	1.65	70	1	D662	D662	G/A	C/C	C/T	C/C	G/C	C/T
2	D663		1137	1	63	1	0	166	1.66	58	0	D663	D663	G/G	C/C	C/C	C/T	G/G	C/C
2	D664		1138	1	62	1	1	170	1.7	85	1	D664	D664	G/G	C/C	C/C	C/T	G/G	T/T
2	D665		1139	1	66	1	0	175	1.75	75	1	D665	D665	G/G	C/C	C/T	C/C	G/G	C/C
2	D666		1140	1	53	0	0	168	1.68	69	1	D666	D666	G/G	C/C	C/T	C/T	G/G	C/T
2	D667		1141	1	52	0	0	168	1.68	60	0	D667	D667	G/G	C/C	C/T	C/C	G/G	C/T
2	D668		1142	2	77	0	0	150	1.5	50	0	D668	D668	G/G	C/C	C/C	C/C	G/G	C/C
2	D669		1143	1	81	0	0	169	1.69	68	0	D669	D669	G/G	C/C	C/T	C/T	G/G	C/C
2	D670		1144	1	67	0	0	180	1.8	75	0	D670	D670	G/G	C/C	C/T	C/C	G/G	C/T
2	D671		1145	1	54	1	0	168	1.68	76	1	D671	D671	G/G	C/C	C/T	C/T	G/G	C/C
2	D672		1146	1	55	0	0	180	1.8	77	0	D672	D672	G/G	C/C	C/T	C/C	G/G	C/C
2	D673		1147	2	69	0	0	157	1.57	60	1	D673	D673	G/G	C/C	C/C	C/C	G/G	C/C
2	D674		1148	2	74	0	0	158	1.58	47	0	D674	D674	G/G	C/C	C/C	C/C	G/G	T/T
2	D675		1149	2	76	0	0	163	1.63	65	1	D675	D675	G/G	C/C	C/T	C/C	G/G	C/T
2	D676		1150	1	65	0	1	172	1.72	71	0	D676	D676	G/G	G/C	C/C	C/T	G/G	C/T
2	D677		1151	1	58	1	1	176	1.76	75	1	D677	D677	G/G	C/C	C/T	C/C	G/G	C/T
2	D678		1152	1	68	0	0	177	1.77	91	1	D678	D678	G/G	C/C	C/C	C/C	G/G	C/C
2	D679		1153	1	51	1	0	173	1.73	87	1	D679	D679	G/G	C/C	C/C	C/C	G/G	T/T
2	D680		1154	1	48	1	0	175	1.75	78	1	D680	D680	G/G	C/C	C/T	C/C	G/G	C/T
2	D681		1155	2	54	0	0	153	1.53	48	0	D681	D681	G/G	C/C	C/T	C/C	G/G	C/T
2	D682		1156	1	79	0	1	170	1.7	63	0	D682	D682	G/G	C/C	C/C	C/T	G/G	C/T
2	D683		1157	2	60	0	0	160	1.6	65	1	D683	D683	G/A	C/C	C/C	T/T	G/C	C/C
2	D684		1158	2	64	0	0	150	1.5	45	0	D684	D684	G/G	C/C	C/C	C/C	G/G	T/T
2	D685		1159	1	66	0	0	162	1.62	70	1	D685	D685	G/G	C/C	C/T	C/C	G/G	C/C
2	D686		1160	1	68	1	0	160	1.6	50	0	D686	D686	G/G	C/C	C/T	C/C	G/G	C/C
2	D687		1161	1	59	1	1	168	1.68	75	1	D687	D687	G/A	G/C	C/C	C/T	G/C	C/C
2	D688		1162	1	67	1	0	169	1.69	68	0	D688	D688	G/G	C/C	C/C	C/C	G/G	T/T
2	D689		1163	2	59	0	0	156	1.56	57	0	D689	D689	G/G	C/C	C/T	C/C	G/G	C/T
2	D690		1164	1	73	0	0	169	1.69	67	0	D690	D690	G/A	C/C	C/C	C/T	G/C	C/T
2	D691		1165	1	56	1	0	170	1.7	65	0	D691	D691	G/G	C/C	C/C	C/C	G/G	C/T
2	D692		1166	1	60	0	0	170	1.7	64	0	D692	D692	G/G	C/C	C/C	C/C	G/G	C/T
2	D693		1167	1	51	0	0	170	1.7	65	0	D693	D693	G/G	G/C	C/C	T/T	G/G	C/C
2	D694		1168	1	58	1	0	164	1.64	61	0	D694	D694	G/G	C/C	C/C	C/T	G/G	T/T
2	D695		1169	1	78	0	0	170	1.7	71	1	D695	D695	G/G	C/C	C/T	C/C	G/G	C/C
2	D696		1170	1	65	0	0	162	1.62	57	0	D696	D696	G/G	C/C	C/C	C/T	G/G	C/T
2	D697		1171	2	71	0	0	160	1.6	46	0	D697	D697	G/A	C/C	C/T	C/T	G/C	C/T
2	D698		1172	1	63	0	0	176	1.76	65	0	D698	D698	G/G	C/C	C/C	C/C	G/G	C/T
2	D699		1173	1	66	0	0	170	1.7	73	1	D699	D699	G/G	C/C	C/C	C/T	G/G	C/T
2	D700		1174	1	78	1	0	164	1.64	58	0	D700	D700	G/G	C/C	C/C	C/C	G/G	C/T
2	ZD001		1175	2	58	0	0	155	1.55	56	0	ZD001	ZD001	G/G	G/C	C/C	C/C	G/G	T/T
2	ZD002		1176	1	68	0	0	172	1.72	72	1	ZD002	ZD002	G/A	C/C	C/C	C/C	G/C	C/C
2	ZD003		1177	2	61	0	0	158	1.58	48	0	ZD003	ZD003	G/A	C/C	C/C	C/T	G/C	C/T
2	ZD004		1178	1	68	0	0	168	1.68	66	0	ZD004	ZD004	G/G	C/C	C/C	C/C	G/G	C/T
2	ZD005		1179	1	62	1	1	178	1.78	85	1	ZD005	ZD005	G/G	C/C	C/C	C/C	G/G	T/T
2	ZD006		1180	1	69	0	0	165	1.65	63	0	ZD006	ZD006	G/A	C/C	C/C	C/C	G/C	C/T
2	ZD007		1181	1	54	0	0	171	1.71	67	0	ZD007	ZD007	G/G	C/C	C/C	T/T	G/G	T/T
2	ZD008		1182	1	58	0	0	173	1.73	78	1	ZD008	ZD008	G/G	C/C	C/C	C/T	G/G	T/T
2	ZD009		1183	2	60	0	0	150	1.5	63	1	ZD009	ZD009	G/A	C/C	C/T	C/C	G/C	C/C
2	ZD010		1184	1	69	1	1	170	1.7	61	0	ZD010	ZD010	G/G	C/C	C/C	C/T	G/G	C/T
2	ZD011		1185	1	59	1	0	170	1.7	70	1	ZD011	ZD011	G/G	C/C	C/C	C/C	G/G	C/T
2	ZD012		1186	2	59	0	0	165	1.65	66	1	ZD012	ZD012	G/G	C/C	C/C	C/T	G/G	C/C
2	ZD013		1187	1	64	0	0	168	1.68	78	1	ZD013	ZD013	G/G	C/C	T/T	C/C	G/G	C/C
2	ZD014		1188	1	58	1	0	168	1.68	52	0	ZD014	ZD014	G/A	C/C	C/C	C/C	G/C	T/T
2	ZD015		1189	1	60	0	0	170	1.7	75	1	ZD015	ZD015	G/G	C/C	C/T	C/C	G/G	C/C
2	ZD016		1190	1	60	1	1	175	1.75	75	1	ZD016	ZD016	G/G	C/C	C/T	C/C	G/G	C/T
2	ZD018		1191	2	50	0	0	159	1.59	55	0	ZD018	ZD018	G/A	C/C	C/C	C/C	G/C	T/T
2	ZD019		1192	1	54	1	1	169	1.69	71	1	ZD019	ZD019	G/A	C/C	C/C	C/T	G/C	C/T
2	ZD020		1193	1	58	0	0	170	1.7	70	1	ZD020	ZD020	G/A	C/C	C/C	C/C	G/C	C/T
2	ZD021		1194	1	68	1	0	179	1.79	93	1	ZD021	ZD021	G/G	C/C	C/T	C/C	G/G	C/C
2	ZD022		1195	1	57	0	0	165	1.65	59	0	ZD022	ZD022	G/A	C/C	T/T	C/C	G/C	C/C
2	ZD023		1196	2	71	0	0	158	1.58	54	0	ZD023	ZD023	G/G	C/C	C/T	C/T	G/G	C/C
2	ZD024		1197	1	62	0	0	172	1.72	80	1	ZD024	ZD024	G/G	C/C	C/T	C/T	G/G	C/T
2	ZD025		1198	1	66	0	0	173	1.73	65	0	ZD025	ZD025	G/G	G/C	C/T	C/C	G/G	C/T
2	ZD026		1199	1	65	1	0	172	1.72	72	1	ZD026	ZD026	G/G	C/C	C/C	C/T	G/G	C/T
2	ZD027		1200	1	61	0	0	165	1.65	67	1	ZD027	ZD027	G/A	C/C	C/C	C/T	G/C	C/T
2	ZD029		1201	2	61	0	0	160	1.6	50	0	ZD029	ZD029	G/G	C/C	C/C	C/C	G/G	C/C
2	ZD030		1202	2	57	0	0	165	1.65	63	0	ZD030	ZD030	G/G	C/C	C/C	T/T	G/G	C/T
2	ZD031		1203	1	56	1	1	166	1.66	79	1	ZD031	ZD031	G/G	C/C	C/C	C/T	G/G	C/T
2	ZD032		1204	2	71	0	0	158	1.58	60	1	ZD032	ZD032	G/G	C/C	C/C	C/C	G/G	C/T
2	ZD033		1205	2	59	0	0	157	1.57	60.5	1	ZD033	ZD033	G/G	G/C	C/C	C/T	G/G	T/T
2	ZD034		1206	2	61	0	0	163	1.63	70	1	ZD034	ZD034	G/G	C/C	C/C	C/C	G/G	C/T
2	ZD035		1207	2	54	0	1	163	1.63	57	0	ZD035	ZD035	G/G	C/C	C/C	C/T	G/G	C/T
2	ZD036		1208	1	65	0	0	170	1.7	70	1	ZD036	ZD036	G/G	C/C	C/C	C/C	G/G	C/T
2	ZD037		1209	1	64	1	0	165	1.65	65	0	ZD037	ZD037	G/G	C/C	C/C	C/T	G/G	C/T
2	ZD038		1210	2	66	0	0	160	1.6	62	1	ZD038	ZD038	G/G	C/C	C/C	C/C	G/G	C/T
2	ZD039		1211	1	56	1	1	178	1.78	68	0	ZD039	ZD039	G/G	C/C	C/T	C/C	G/G	C/T
2	ZD040		1212	1	51	1	0	173	1.73	79	1	ZD040	ZD040	G/G	C/C	C/C	C/C	G/G	C/T
2	ZD041		1213	1	54	0	0	182	1.82	84	1	ZD041	ZD041	G/A	C/C	C/T	C/C	G/C	C/T
2	ZD042		1214	1	75	1	0	169	1.69	70	1	ZD042	ZD042	G/G	C/C	C/C	C/C	G/G	C/T
2	ZD043		1215	1	59	1	1	172	1.72	65	0	ZD043	ZD043	G/G	C/C	C/C	C/C	G/G	C/T
2	ZD044		1216	1	57	1	0	170	1.7	70	1	ZD044	ZD044	G/A	C/C	C/T	C/T	G/C	C/T
2	ZD045		1217	1	66	0	1	165	1.65	80	1	ZD045	ZD045	G/G	C/C	T/T	C/C	G/G	C/C
2	ZD046		1218	1	73	0	0	156	1.56	70	1	ZD046	ZD046	G/A	C/C	C/C	C/C	G/C	T/T
2	ZD047		1219	1	63	0	1	175	1.75	65	0	ZD047	ZD047	G/G	C/C	C/T	C/C	G/G	C/T
2	ZD048		1220	2	77	0	0	160	1.6	52.5	0	ZD048	ZD048	G/G	C/C	C/C	C/C	G/G	T/T
2	ZD050		1221	1	52	1	1	171	1.71	60.5	0	ZD050	ZD050	G/G	C/C	C/C	C/C	G/G	C/C
2	ZD051		1222	2	65	0	0	160	1.6	61	0	ZD051	ZD051	G/G	C/C	T/T	C/T	G/G	C/C
2	ZD052		1223	1	59	1	0	170	1.7	66	0	ZD052	ZD052	G/G	C/C	C/T	C/T	G/G	C/T
2	ZD053		1224	1	67	0	0	171	1.71	60	0	ZD053	ZD053	G/G	G/C	C/T	C/C	G/G	C/C
2	ZD054		1225	1	64	0	1	170	1.7	85	1	ZD054	ZD054	G/G	C/C	C/T	C/T	G/G	C/C
2	ZD055		1226	1	57	1	0	169	1.69	76.5	1	ZD055	ZD055	G/G	C/C	C/C	C/C	G/G	C/T
2	ZD056		1227	1	52	0	0	170	1.7	70	1	ZD056	ZD056	G/G	C/C	C/C	C/T	G/G	T/T
2	ZD057		1228	1	73	0	0	160	1.6	60	0	ZD057	ZD057	G/G	G/C	C/C	C/T	G/G	C/C
2	ZD058		1229	1	51	0	0	176	1.76	82	1	ZD058	ZD058	G/G	C/C	C/T	C/C	G/G	C/T
2	ZD059		1230	1	68	1	1	168	1.68	75	1	ZD059	ZD059	G/G	C/C	C/T	C/C	G/G	C/C
2	ZD060		1231	1	63	0	0	174	1.74	70	0	ZD060	ZD060	G/A	C/C	C/T	C/T	G/C	C/C
2	ZD061		1232	2	70	0	0	150	1.5	49	0	ZD061	ZD061	G/G	C/C	C/C	C/C	G/G	C/T
2	ZD062		1233	1	63	1	0	169	1.69	74	1	ZD062	ZD062	G/G	C/C	C/T	C/T	G/G	C/T
2	ZD063		1234	2	68	0	0	156	1.56	62.5	1	ZD063	ZD063	G/G	C/C	C/C	C/T	G/G	C/C
2	ZD064		1235	2	55	0	0	160	1.6	62	1	ZD064	ZD064	G/G	C/C	C/C	C/C	G/G	C/T
2	ZD065		1236	1	55	1	1	168	1.68	80	1	ZD065	ZD065	G/G	C/C	C/C	C/C	G/G	C/T
2	ZD066		1237	1	68	1	1	180	1.8	70	0	ZD066	ZD066	G/G	C/C	C/C	C/C	G/G	C/T
2	ZD067		1238	1	64	1	1	165	1.65	64	0	ZD067	ZD067	G/G	C/C	C/C	C/C	G/G	C/C
2	ZD068		1239	1	60	0	0	165	1.65	55	0	ZD068	ZD068	G/G	C/C	C/C	C/T	G/G	C/T
2	ZD069		1240	1	73	1	1	165	1.65	72	1	ZD069	ZD069	G/G	C/C	C/T	C/C	G/G	C/T
2	ZD070		1241	1	50	0	0	178	1.78	60	0	ZD070	ZD070	G/G	C/C	C/C	C/C	G/G	C/T
2	ZD071		1242	1	51	0	1	168	1.68	78	1	ZD071	ZD071	G/G	C/C	C/C	C/T	G/G	T/T
2	ZD072		1243	1	77	0	0	171	1.71	72	1	ZD072	ZD072	G/G	C/C	C/T	C/T	G/G	C/C
2	ZD073		1244	1	58	1	1	168	1.68	65	0	ZD073	ZD073	G/G	C/C	C/C	C/T	G/G	C/C
2	ZD074		1245	1	57	0	0	178	1.78	56	0	ZD074	ZD074	G/G	C/C	C/C	C/C	G/G	C/T
2	ZD075		1246	1	61	1	1	170	1.7	82	1	ZD075	ZD075	G/G	C/C	C/T	C/C	G/G	C/T
2	ZD076		1247	1	63	1	0	178	1.78	60	0	ZD076	ZD076	G/G	G/C	C/C	C/T	G/G	T/T
2	ZD077		1248	2	70	0	0	151	1.51	60	1	ZD077	ZD077	G/G	C/C	C/T	C/C	G/G	C/T
2	ZD078		1249	1	70	1	0	176	1.76	77.7	1	ZD078	ZD078	G/G	C/C	C/C	C/C	G/G	T/T
2	ZD079		1250	1	60	1	0	170	1.7	60	0	ZD079	ZD079	G/G	C/C	C/C	C/C	G/G	C/C
2	ZD080		1251	1	79	0	0	165	1.65	65	0	ZD080	ZD080	G/G	C/C	T/T	C/C	G/G	C/C
2	ZD081		1252	2	66	0	0	158	1.58	68	1	ZD081	ZD081	G/G	C/C	C/C	C/C	G/G	C/T
2	ZD082		1253	1	70	1	1	174	1.74	75	1	ZD082	ZD082	G/G	G/C	C/T	C/T	G/G	C/T
2	ZD083		1254	1	65	1	0	172	1.72	66	0	ZD083	ZD083	G/G	C/C	C/T	C/T	G/G	C/T
2	ZD084		1255	2	63	0	0	162	1.62	55	0	ZD084	ZD084	G/G	C/C	C/T	C/C	G/G	C/T
2	ZD085		1256	2	59	0	0	163	1.63	68	1	ZD085	ZD085	G/G	G/C	C/T	C/T	G/G	C/C
2	ZD086		1257	1	59	1	1	164	1.64	59	0	ZD086	ZD086	G/G	C/C	T/T	C/C	G/G	C/C
2	ZD087		1258	1	61	1	1	167	1.67	63	0	ZD087	ZD087	G/G	C/C	C/C	T/T	G/G	C/C
2	ZD088		1259	1	50	0	1	177	1.77	84	1	ZD088	ZD088	G/G	C/C	C/C	C/C	G/G	C/T
2	ZD089		1260	1	71	1	0	168	1.68	61	0	ZD089	ZD089	G/G	C/C	C/C	C/C	G/G	C/T
2	ZD090		1261	2	50	0	0	160	1.6	65	1	ZD090	ZD090	G/G	C/C	C/T	C/C	G/G	C/C
2	ZD091		1262	1	65	0	0	170	1.7	70	1	ZD091	ZD091	G/G	G/C	C/C	C/C	G/G	T/T
2	ZD092		1263	1	69	0	0	168	1.68	70	1	ZD092	ZD092	G/G	C/C	C/T	C/C	G/G	C/C
2	ZD093		1264	2	73	0	0	165	1.65	70	1	ZD093	ZD093	G/G	C/C	C/T	C/C	G/G	C/T
2	ZD094		1265	1	68	0	0	173	1.73	62	0	ZD094	ZD094	G/G	C/C	C/T	C/C	G/G	C/T
2	ZD095		1266	2	56	0	0	170	1.7	69	0	ZD095	ZD095	G/G	C/C	C/T	C/C	G/G	C/C
2	ZD096		1267	1	78	1	1	173	1.73	65	0	ZD096	ZD096	G/G	C/C	C/C	C/C	G/G	C/T
2	ZD097		1268	1	65	1	1	174	1.74	65	0	ZD097	ZD097	G/G	G/C	C/T	C/T	G/G	C/T
2	ZD098		1269	1	74	0	0	175	1.75	75	1	ZD098	ZD098	G/G	C/C	C/C	C/C	G/G	T/T
2	ZD099		1270	1	75	1	0	165	1.65	76	1	ZD099	ZD099	G/G	C/C	C/T	C/T	G/G	C/T
2	ZD100		1271	1	55	0	0	178	1.78	57	0	ZD100	ZD100	G/G	G/C	T/T	T/T	G/G	C/C
2	ZD101		1272	2	68	0	0	160	1.6	82	1	ZD101	ZD101	G/G	C/C	C/C	C/C	G/G	C/T
2	ZD102		1273	2	59	0	0	160	1.6	73	1	ZD102	ZD102	G/G	G/C	C/T	C/T	G/G	C/T
2	ZD103		1274	1	59	0	0	170	1.7	65	0	ZD103	ZD103	A/A	C/C	T/T	C/C	C/C	C/C
2	ZD104		1275	1	59	1	0	165	1.65	62.5	0	ZD104	ZD104	G/G	C/C	C/C	C/C	G/G	C/C
2	ZD105		1276	1	56	0	0	174	1.74	75	1	ZD105	ZD105	G/G	C/C	C/T	C/T	G/G	C/C
2	ZD106		1277	2	63	0	0	159	1.59	62	1	ZD106	ZD106	G/G	C/C	C/T	C/C	G/G	C/C
2	ZD107		1278	1	70	1	1	172	1.72	65	0	ZD107	ZD107	G/G	C/C	C/C	C/T	G/G	C/T
2	ZD108		1279	2	71	0	0	160	1.6	63	1	ZD108	ZD108	G/G	C/C	C/T	C/T	G/G	C/T
2	ZD109		1280	1	52	1	0	184	1.84	87.5	1	ZD109	ZD109	G/G	C/C	C/C	C/C	G/G	C/T
2	ZD110		1281	2	68	0	0	157	1.57	75	1	ZD110	ZD110	G/G	G/G	C/C	T/T	G/G	T/T
2	ZD111		1282	2	53	0	0	160	1.6	65	1	ZD111	ZD111	G/G	C/C	C/C	C/T	G/G	T/T
2	ZD112		1283	1	61	1	1	165	1.65	62.5	0	ZD112	ZD112	G/G	C/C	C/C	C/T	G/G	C/T
2	ZD113		1284	1	74	0	0	176	1.76	78	1	ZD113	ZD113	G/G	G/C	C/C	C/T	G/G	T/T
2	ZD114		1285	2	72	0	0	152	1.52	63	1	ZD114	ZD114	G/G	C/C	C/C	C/T	G/G	T/T
2	ZD115		1286	1	74	0	0	172	1.72	70	0	ZD115	ZD115	G/G	C/C	C/C	C/C	G/G	T/T
2	ZD116		1287	2	68	0	0	150	1.5	52	0	ZD116	ZD116	G/G	C/C	C/T	C/C	G/G	C/T
2	ZD117		1288	1	76	0	0	165	1.65	91	1	ZD117	ZD117	G/G	C/C	C/T	C/C	G/G	C/T
2	ZD118		1289	1	61	0	0	172	1.72	70	0	ZD118	ZD118	G/G	C/C	C/T	C/T	G/G	C/T
2	ZD119		1290	1	61	0	1	170	1.7	72	1	ZD119	ZD119	G/G	C/C	C/C	C/C	G/G	C/C
2	ZD120		1291	1	74	1	0	163	1.63	79.5	1	ZD120	ZD120	G/G	C/C	C/T	C/T	G/G	C/T
2	ZD122		1292	1	71	1	0	170	1.7	70	1	ZD122	ZD122	G/G	C/C	C/C	C/C	G/G	T/T
2	ZD123		1293	1	56	0	0	170	1.7	59	0	ZD123	ZD123	G/G	C/C	C/T	C/C	G/G	C/T
2	ZD124		1294	1	64	1	1	170	1.7	68	0	ZD124	ZD124	G/G	C/C	T/T	C/T	G/G	C/C
2	ZD125		1295	2	53	0	0	156	1.56	60	1	ZD125	ZD125	G/G	C/C	C/C	C/C	G/G	T/T
2	ZD126		1296	1	71	0	0	166	1.66	86	1	ZD126	ZD126	G/G	C/C	C/T	C/C	G/G	C/C
2	ZD127		1297	1	52	0	0	176	1.76	90	1	ZD127	ZD127	G/G	C/C	C/C	C/C	G/G	C/T
2	ZD128		1298	1	70	0	0	172	1.72	70	0	ZD128	ZD128	G/A	C/C	C/T	C/T	G/C	C/T
2	ZD129		1299	1	52	1	0	175	1.75	75	1	ZD129	ZD129	G/G	C/C	T/T	C/C	G/G	C/C
2	ZD131		1300	1	66	0	0	170	1.7	59	0	ZD131	ZD131	G/G	C/C	C/C	C/T	G/G	C/T
2	ZD132		1301	2	57	0	0	160	1.6	60	0	ZD132	ZD132	G/G	C/C	T/T	C/C	G/G	C/C
2	ZD133		1302	1	56	1	1	180	1.8	65	0	ZD133	ZD133	G/G	C/C	C/C	C/C	G/G	C/T
2	ZD134		1303	1	75	1	1	160	1.6	51	0	ZD134	ZD134	?	?	?	?	?	?
2	ZD135		1304	2	62	0	0	155	1.55	57	0	ZD135	ZD135	G/G	C/C	C/C	C/C	G/G	T/T
2	ZD136		1305	1	74	0	0	176	1.76	75	1	ZD136	ZD136	G/G	C/C	C/C	C/C	G/G	T/T
2	ZD137		1306	2	70	0	0	155	1.55	52	0	ZD137	ZD137	G/G	C/C	C/T	C/C	G/G	C/T
2	ZD138		1307	1	73	0	0	178	1.78	70	0	ZD138	ZD138	G/G	C/C	C/C	C/T	G/G	C/C
2	ZD139		1308	2	61	0	0	156	1.56	58	0	ZD139	ZD139	G/G	C/C	C/T	C/T	G/G	C/T
2	ZD140		1309	1	73	0	0	170	1.7	72	1	ZD140	ZD140	G/G	G/C	C/C	C/T	G/G	C/C
2	ZD141		1310	2	57	0	0	161	1.61	54	0	ZD141	ZD141	G/G	C/C	C/T	C/C	G/G	C/T
2	ZD142		1311	2	63	0	0	160	1.6	70	1	ZD142	ZD142	G/G	C/C	C/T	C/C	G/G	C/T
2	ZD143		1312	2	58	0	0	160	1.6	65	1	ZD143	ZD143	G/G	C/C	C/C	C/C	G/G	C/T
2	ZD144		1313	1	66	0	0	175	1.75	73	0	ZD144	ZD144	G/G	C/C	C/C	C/C	G/G	C/T
2	ZD145		1314	1	67	1	0	170	1.7	82	1	ZD145	ZD145	G/G	C/C	C/C	C/C	G/G	C/T
2	ZD146		1315	1	65	1	1	153	1.53	61	1	ZD146	ZD146	G/G	C/C	C/C	C/C	G/G	C/T
2	ZD147		1316	1	50	0	0	176	1.76	65	0	ZD147	ZD147	G/G	C/C	C/T	C/C	G/G	C/C
2	ZD148		1317	2	55	0	0	164	1.64	65	1	ZD148	ZD148	G/G	C/C	C/C	C/C	G/G	C/T
2	ZD149		1318	1	74	0	0	173	1.73	78	1	ZD149	ZD149	G/G	C/C	T/T	C/C	G/G	C/C
2	ZD150		1319	1	56	0	0	178	1.78	90	1	ZD150	ZD150	G/G	C/C	C/C	C/C	G/G	C/T
2	ZD151		1320	2	59	0	0	160	1.6	59	0	ZD151	ZD151	G/G	C/C	C/C	C/T	G/G	C/T
2	ZD152		1321	1	65	1	1	166	1.66	54	0	ZD152	ZD152	G/G	C/C	C/T	C/C	G/G	C/C
2	ZD153		1322	2	72	0	0	160	1.6	45	0	ZD153	ZD153	G/G	C/C	C/C	C/C	G/G	C/T
2	ZD154		1323	2	47	0	0	155	1.55	60	1	ZD154	ZD154	G/G	C/C	C/C	C/C	G/G	C/T
2	ZD155		1324	1	58	1	1	170	1.7	63	0	ZD155	ZD155	G/G	C/C	C/C	C/C	G/G	C/T
2	ZD157		1325	1	60	1	1	168	1.68	60	0	ZD157	ZD157	G/G	C/C	C/C	C/T	G/G	T/T
2	ZD158		1326	1	69	0	0	172	1.72	72	1	ZD158	ZD158	G/G	C/C	C/C	C/T	G/G	T/T
2	ZD159		1327	2	62	0	0	155	1.55	50	0	ZD159	ZD159	G/G	C/C	C/C	C/C	G/G	T/T
2	ZD161		1328	1	74	1	1	170	1.7	70	1	ZD161	ZD161	G/G	C/C	C/T	C/C	G/G	C/C
2	ZD162		1329	2	61	0	0	160	1.6	75	1	ZD162	ZD162	G/G	C/C	C/T	C/C	G/G	C/C
2	ZD163		1330	2	69	0	0	158	1.58	60	1	ZD163	ZD163	G/G	C/C	C/C	C/C	G/G	C/T
2	ZD164		1331	1	78	0	0	170	1.7	65	0	ZD164	ZD164	G/G	C/C	C/C	C/C	G/G	T/T
2	ZD165		1332	1	70	1	0	168	1.68	80	1	ZD165	ZD165	G/G	C/C	C/C	C/T	G/G	C/C
2	ZD166		1333	2	53	0	0	164	1.64	60	0	ZD166	ZD166	G/G	C/C	C/T	C/C	G/G	C/C
2	ZD167		1334	1	58	0	0	174	1.74	75	1	ZD167	ZD167	G/G	C/C	C/T	C/T	G/G	C/C
2	ZD168		1335	2	61	0	0	156	1.56	52.5	0	ZD168	ZD168	G/G	C/C	C/C	C/C	G/G	T/T
2	ZD169		1336	1	68	0	0	171	1.71	67	0	ZD169	ZD169	G/G	C/C	C/C	T/T	G/G	T/T
2	ZD170		1337	1	68	0	0	165	1.65	60	0	ZD170	ZD170	G/G	C/C	C/T	T/T	G/G	C/C
2	ZD171		1338	1	69	0	0	166	1.66	70	1	ZD171	ZD171	G/G	C/C	C/T	C/C	G/G	C/C
2	ZD172		1339	1	61	0	0	158	1.58	52	0	ZD172	ZD172	G/G	C/C	C/C	C/C	G/G	T/T
2	ZD173		1340	2	53	0	0	155	1.55	42	0	ZD173	ZD173	G/A	C/C	C/T	C/C	G/C	C/T
2	ZD174		1341	1	69	0	0	178	1.78	96	1	ZD174	ZD174	G/A	G/G	C/T	C/C	G/C	C/T
2	ZD175		1342	2	45	0	0	157	1.57	60	1	ZD175	ZD175	G/G	C/C	C/C	C/C	G/G	C/T
2	ZD176		1343	1	55	1	1	169	1.69	65	0	ZD176	ZD176	G/G	C/C	C/C	C/C	G/G	C/T
2	ZD177		1344	2	52	0	0	156	1.56	66	1	ZD177	ZD177	G/G	C/C	C/C	C/C	G/G	C/T
2	ZD178		1345	1	67	0	0	173	1.73	82	1	ZD178	ZD178	G/G	C/C	C/C	C/T	G/G	C/C
2	ZD179		1346	1	53	1	0	175	1.75	86	1	ZD179	ZD179	G/A	C/C	T/T	C/C	G/C	C/C
2	ZD180		1347	2	59	0	0	155	1.55	71	1	ZD180	ZD180	G/G	C/C	C/C	C/C	G/G	C/T
2	ZD181		1348	1	49	1	1	176	1.76	64	0	ZD181	ZD181	G/G	C/C	C/C	C/C	G/G	T/T
2	ZD182		1349	2	59	0	0	163	1.63	88	1	ZD182	ZD182	G/G	C/C	T/T	C/T	G/G	C/C
2	ZD183		1350	1	55	1	0	174	1.74	80	1	ZD183	ZD183	G/G	C/C	C/C	C/C	G/G	C/C
2	ZD185		1351	1	62	0	0	160	1.6	62	1	ZD185	ZD185	G/G	C/C	C/C	T/T	G/G	C/T
2	ZD186		1352	2	63	0	0	157	1.57	63	1	ZD186	ZD186	G/G	C/C	C/C	C/C	G/G	C/T
2	ZD187		1353	1	57	0	1	175	1.75	65	0	ZD187	ZD187	G/G	C/C	C/T	C/C	G/G	C/T
2	ZD188		1354	1	53	0	0	174	1.74	68	0	ZD188	ZD188	G/G	G/C	C/T	C/C	G/G	C/T
2	ZD189		1355	2	68	0	0	158	1.58	55	0	ZD189	ZD189	G/G	C/C	C/C	C/T	G/G	C/T
2	ZD190		1356	1	76	0	0	171	1.71	64	0	ZD190	ZD190	G/G	C/C	C/C	C/T	G/G	C/C
2	ZD191		1357	2	79	0	0	150	1.5	49	0	ZD191	ZD191	G/G	G/C	C/C	C/T	G/G	T/T
2	ZD192		1358	1	45	0	0	176	1.76	90	1	ZD192	ZD192	G/G	C/C	C/C	C/T	G/G	T/T
2	ZD193		1359	1	72	0	0	172	1.72	60	0	ZD193	ZD193	G/G	C/C	C/T	C/C	G/G	C/C
2	ZD194		1360	1	67	1	1	170	1.7	55	0	ZD194	ZD194	G/G	C/C	C/T	C/C	G/G	C/T
2	ZD195		1361	1	52	0	0	170	1.7	74	1	ZD195	ZD195	G/A	C/C	C/C	T/T	G/C	C/T
2	ZD196		1362	2	47	0	0	164	1.64	55	0	ZD196	ZD196	G/G	C/C	T/T	C/C	G/G	C/C
2	ZD197		1363	1	53	0	0	165	1.65	68	1	ZD197	ZD197	G/G	C/C	C/C	C/C	G/G	C/T
2	ZD198		1364	2	56	0	0	159	1.59	57	0	ZD198	ZD198	G/G	C/C	C/C	C/C	G/G	C/C
2	ZD199		1365	1	70	1	0	169	1.69	70	1	ZD199	ZD199	G/G	G/C	C/C	C/C	G/G	T/T
2	ZD200		1366	1	70	0	0	170	1.7	73	1	ZD200	ZD200	G/G	C/C	C/C	C/T	G/G	C/T
2	ZD201		1367	2	53	0	0	160	1.6	59	0	ZD201	ZD201	G/G	C/C	C/C	C/T	G/G	C/C
2	ZD202		1368	1	52	0	1	170	1.7	55	0	ZD202	ZD202	G/G	C/C	C/T	C/C	G/G	C/T
2	ZD203		1369	1	63	0	0	170	1.7	55.5	0	ZD203	ZD203	G/G	C/C	C/T	C/T	G/G	C/T
2	ZD204		1370	2	67	0	0	163	1.63	80	1	ZD204	ZD204	G/G	C/C	C/T	C/C	G/G	C/T
2	ZD205		1371	2	48	0	0	161	1.61	85	1	ZD205	ZD205	G/G	C/C	C/C	C/T	G/G	C/T
2	ZD206		1372	1	61	0	1	170	1.7	65	0	ZD206	ZD206	G/G	C/C	C/C	C/C	G/G	C/T
2	ZD207		1373	2	71	0	0	158	1.58	52	0	ZD207	ZD207	G/G	C/C	C/C	C/C	G/G	T/T
2	ZD208		1374	1	44	0	0	168	1.68	69	1	ZD208	ZD208	G/A	C/C	C/T	C/T	G/C	C/T
2	ZD209		1375	1	69	1	0	178	1.78	68	0	ZD209	ZD209	G/A	G/C	C/T	C/T	G/C	C/C
2	ZD210		1376	1	59	0	0	173	1.73	59	0	ZD210	ZD210	G/G	C/C	C/C	C/T	G/G	C/T
2	ZD212		1377	1	70	1	0	171	1.71	60	0	ZD212	ZD212	G/G	C/C	C/C	C/C	G/G	C/T
2	ZD213		1378	1	68	0	0	180	1.8	67	0	ZD213	ZD213	G/G	C/C	C/C	C/T	G/G	T/T
2	ZD214		1379	1	52	0	0	176	1.76	75	1	ZD214	ZD214	G/G	C/C	C/T	C/T	G/G	C/C
2	ZD215		1380	2	65	0	0	155	1.55	60	1	ZD215	ZD215	G/G	C/C	C/C	C/T	G/G	C/C
2	ZD216		1381	2	48	0	0	165	1.65	60	0	ZD216	ZD216	G/G	C/C	C/T	C/T	G/G	C/C
2	ZD218		1382	2	59	0	0	160	1.6	60	0	ZD218	ZD218	G/G	C/C	C/T	C/C	G/G	C/T
2	ZD219		1383	1	69	1	1	165	1.65	55	0	ZD219	ZD219	G/G	C/C	C/T	C/C	G/G	C/C
2	ZD220		1384	1	50	0	0	170	1.7	67	0	ZD220	ZD220	G/G	C/C	T/T	C/C	G/G	C/C
2	ZD221		1385	1	70	0	0	172	1.72	70	0	ZD221	ZD221	G/G	G/C	C/T	C/T	G/G	C/T
2	ZD222		1386	2	53	0	0	158	1.58	80	1	ZD222	ZD222	G/A	C/C	T/T	C/T	G/C	C/C
2	ZD223		1387	1	70	1	1	170	1.7	65	0	ZD223	ZD223	G/G	C/C	C/C	C/T	G/G	C/T
2	ZD224		1388	1	71	1	0	172	1.72	63	0	ZD224	ZD224	G/G	C/C	C/T	C/C	G/G	C/T
2	ZD225		1389	1	54	0	0	158	1.58	65	1	ZD225	ZD225	G/G	G/C	C/C	C/T	G/G	T/T
2	ZD226		1390	1	56	0	0	165	1.65	70.5	1	ZD226	ZD226	G/G	C/C	C/T	C/C	G/G	C/C
2	ZD227		1391	2	58	0	0	160	1.6	67	1	ZD227	ZD227	G/A	C/C	C/T	C/C	G/C	C/C
2	ZD228		1392	1	79	0	0	172	1.72	72	1	ZD228	ZD228	G/G	C/C	C/C	C/T	G/G	T/T
2	ZD230		1393	2	72	0	0	148	1.48	45	0	ZD230	ZD230	G/G	C/C	C/T	C/C	G/G	C/T
2	ZD231		1394	1	60	0	0	170	1.7	58	0	ZD231	ZD231	G/G	C/C	C/C	C/C	G/G	T/T
2	ZD233		1395	2	73	0	0	158	1.58	60	1	ZD233	ZD233	G/G	C/C	C/C	C/T	G/G	T/T
2	ZD234		1396	1	60	1	0	170	1.7	65	0	ZD234	ZD234	G/G	C/C	C/T	C/C	G/G	C/C
2	ZD236		1397	2	57	0	0	162	1.62	70	1	ZD236	ZD236	G/G	C/C	C/T	C/C	G/G	C/T
2	ZD237		1398	1	55	0	0	172	1.72	66	0	ZD237	ZD237	G/G	C/C	C/T	C/C	G/G	C/T
2	ZD238		1399	2	68	0	0	160	1.6	60	0	ZD238	ZD238	G/G	C/C	C/T	C/T	G/G	C/T
2	ZD239		1400	2	61	0	0	155	1.55	60	1	ZD239	ZD239	G/G	C/C	C/C	C/C	G/G	T/T
2	ZD240		1401	1	45	1	1	170	1.7	65	0	ZD240	ZD240	G/G	C/C	C/C	C/C	G/G	T/T
2	ZD241		1402	2	64	0	0	160	1.6	55	0	ZD241	ZD241	G/G	C/C	C/C	C/C	G/G	C/T
2	ZD242		1403	1	76	0	0	168	1.68	70	1	ZD242	ZD242	G/G	G/C	C/C	C/T	G/G	T/T
2	ZD243		1404	2	66	0	0	160	1.6	60	0	ZD243	ZD243	G/G	C/C	C/T	C/C	G/G	C/C
2	ZD244		1405	2	67	0	0	160	1.6	60	0	ZD244	ZD244	G/G	C/C	C/C	C/C	G/G	C/C
2	ZD246		1406	2	51	0	0	165	1.65	70	1	ZD246	ZD246	G/G	C/C	C/T	C/C	G/G	C/C
2	ZD247		1407	1	69	0	0	165	1.65	65	0	ZD247	ZD247	G/A	C/C	C/C	C/C	G/C	T/T
2	ZD248		1408	2	67	0	0	158	1.58	72	1	ZD248	ZD248	G/G	C/C	C/C	C/C	G/G	C/T
2	ZD249		1409	1	73	1	0	156	1.56	45	0	ZD249	ZD249	G/G	G/C	C/C	C/T	G/G	C/T
2	ZD250		1410	1	75	0	0	174	1.74	80	1	ZD250	ZD250	G/G	C/C	C/C	C/C	G/G	T/T
2	ZD251		1411	1	51	1	0	160	1.6	56	0	ZD251	ZD251	G/G	C/C	C/C	C/C	G/G	C/T
2	ZD252		1412	1	65	1	0	167	1.67	54	0	ZD252	ZD252	G/G	C/C	C/C	C/C	G/G	C/C
2	ZD253		1413	2	61	0	0	160	1.6	65	1	ZD253	ZD253	G/G	G/C	C/C	C/T	G/G	C/T
2	ZD254		1414	2	65	0	0	166	1.66	65	0	ZD254	ZD254	G/G	C/C	C/T	C/C	G/G	C/T
2	ZD255		1415	2	70	0	0	150	1.5	70	1	ZD255	ZD255	G/G	G/C	C/C	C/C	G/G	C/C
2	ZD257		1416	1	65	0	0	164	1.64	65	1	ZD257	ZD257	G/G	C/C	C/C	C/C	G/G	T/T
2	ZD258		1417	1	60	1	0	168	1.68	70	1	ZD258	ZD258	G/G	C/C	C/C	C/C	G/G	C/T
2	ZD259		1418	1	58	1	1	168	1.68	75	1	ZD259	ZD259	G/A	C/C	C/C	C/C	G/C	T/T
2	ZD260		1419	2	71	0	0	155	1.55	42	0	ZD260	ZD260	G/G	G/C	C/C	C/T	G/G	T/T
2	ZD261		1420	2	67	0	0	160	1.6	58	0	ZD261	ZD261	G/G	C/C	C/C	C/C	G/G	C/T
2	ZD262		1421	2	66	0	0	162	1.62	70	1	ZD262	ZD262	G/G	C/C	C/C	C/C	G/G	T/T
2	ZD264		1422	1	68	0	0	170	1.7	80	1	ZD264	ZD264	G/G	C/C	C/T	C/T	G/G	C/T
2	ZD266		1423	1	43	0	0	175	1.75	75	1	ZD266	ZD266	G/G	C/C	C/T	C/C	G/G	C/C
2	ZD267		1424	1	70	0	0	167	1.67	62	0	ZD267	ZD267	G/G	C/C	C/C	C/C	G/G	C/T
2	ZD268		1425	2	47	0	0	168	1.68	81	1	ZD268	ZD268	G/G	C/C	C/C	C/T	G/G	C/C
2	ZD269		1426	2	52	0	0	156	1.56	60	1	ZD269	ZD269	G/G	C/C	C/C	C/C	G/G	C/T
2	ZD270		1427	1	52	0	0	170	1.7	85	1	ZD270	ZD270	G/G	G/C	C/C	C/T	G/G	T/T
2	ZD272		1428	2	61	0	0	156	1.56	55	0	ZD272	ZD272	G/G	C/C	C/T	C/C	G/G	C/C
2	ZD273		1429	2	66	0	0	160	1.6	55	0	ZD273	ZD273	G/G	C/C	C/C	C/C	G/G	C/C
2	ZD274		1430	2	59	0	0	160	1.6	53	0	ZD274	ZD274	G/G	C/C	C/T	C/T	G/G	C/C
2	ZD275		1431	1	63	1	0	172	1.72	73	1	ZD275	ZD275	G/A	C/C	T/T	C/T	G/C	C/C
2	ZD277		1432	1	59	1	1	170	1.7	65	0	ZD277	ZD277	G/G	G/C	C/C	T/T	G/G	C/C
2	ZD278		1433	1	72	1	0	172	1.72	85	1	ZD278	ZD278	G/G	G/C	C/T	C/T	G/G	C/T
2	ZD279		1434	1	70	1	0	171	1.71	63	0	ZD279	ZD279	G/G	C/C	C/C	C/C	G/G	T/T
2	ZD282		1435	2	56	0	0	160	1.6	70	1	ZD282	ZD282	G/G	C/C	C/T	T/T	G/G	C/C
2	ZD283		1436	2	69	0	0	160	1.6	65	1	ZD283	ZD283	G/G	G/C	C/C	C/C	G/G	T/T
2	ZD285		1437	1	58	1	1	170	1.7	70	1	ZD285	ZD285	G/G	C/C	C/C	C/T	G/G	C/T
2	ZD286		1438	1	49	1	1	175	1.75	80	1	ZD286	ZD286	G/A	C/C	C/T	C/C	G/C	C/T
2	ZD287		1439	2	60	0	0	153	1.53	57	1	ZD287	ZD287	G/G	C/C	C/C	C/T	G/G	C/T
2	ZD288		1440	1	51	1	1	170	1.7	64	0	ZD288	ZD288	G/G	C/C	C/C	C/T	G/G	C/T
2	ZD289		1441	2	51	0	0	150	1.5	65	1	ZD289	ZD289	G/G	C/C	C/C	C/C	G/G	T/T
2	ZD290		1442	1	75	0	0	161	1.61	55	0	ZD290	ZD290	G/G	C/C	C/T	C/C	G/G	C/C
2	ZD291		1443	1	46	1	0	168	1.68	79	1	ZD291	ZD291	G/G	G/C	C/C	C/T	G/G	T/T
2	ZD292		1444	1	64	1	0	177	1.77	70	0	ZD292	ZD292	G/G	C/C	C/C	C/C	G/G	C/C
2	ZD293		1445	1	72	1	1	178	1.78	60	0	ZD293	ZD293	G/G	C/C	C/T	C/C	G/G	C/C
2	ZD296		1446	1	75	0	0	170	1.7	68	0	ZD296	ZD296	G/G	C/C	C/C	C/C	G/G	C/T
2	ZD297		1447	1	56	1	1	170	1.7	76	1	ZD297	ZD297	G/G	C/C	C/T	C/T	G/G	C/T
2	ZD298		1448	2	46	0	0	155	1.55	45	0	ZD298	ZD298	G/G	C/C	C/C	C/T	G/G	C/C
2	ZD300		1449	2	56	0	0	160	1.6	52	0	ZD300	ZD300	G/G	C/C	C/T	C/T	G/G	C/C
2	ZD301		1450	2	72	0	0	155	1.55	70	1	ZD301	ZD301	G/G	C/C	C/C	C/T	G/G	C/T
2	ZD302		1451	1	79	0	0	170	1.7	75	1	ZD302	ZD302	G/G	C/C	C/T	C/T	G/G	C/T
2	ZD303		1452	1	53	0	0	168	1.68	71	1	ZD303	ZD303	G/G	C/C	C/C	C/T	G/G	C/T
2	ZD304		1453	1	68	1	1	174	1.74	60	0	ZD304	ZD304	G/G	C/C	C/C	C/C	G/G	T/T
2	ZD305		1454	1	69	1	1	175	1.75	65	0	ZD305	ZD305	G/G	C/C	C/C	C/T	G/G	T/T
2	ZD307		1455	1	70	1	0	160	1.6	70	1	ZD307	ZD307	G/G	G/C	C/C	T/T	G/G	C/C
2	ZD308		1456	1	75	1	0	168	1.68	68	1	ZD308	ZD308	G/G	C/C	C/T	C/T	G/G	C/T
2	ZD309		1457	2	66	0	0	156	1.56	62	1	ZD309	ZD309	G/G	C/C	C/C	C/C	G/G	C/T
2	ZD310		1458	1	67	0	0	174	1.74	70	0	ZD310	ZD310	G/A	C/C	C/C	C/T	G/C	T/T
2	ZD312		1459	1	67	0	0	170	1.7	70	1	ZD312	ZD312	G/G	G/C	C/T	C/T	G/G	C/T
2	ZD313		1460	2	54	0	0	165	1.65	80	1	ZD313	ZD313	G/G	C/C	C/C	C/C	G/G	C/C
2	ZD316		1461	1	53	0	0	176	1.76	66	0	ZD316	ZD316	G/G	C/C	C/C	C/T	G/G	C/T
2	ZD317		1462	1	65	1	0	165	1.65	67.5	1	ZD317	ZD317	G/G	G/C	C/C	C/C	G/G	C/T
2	ZD318		1463	2	60	0	0	162	1.62	57	0	ZD318	ZD318	G/G	C/C	C/T	C/C	G/G	C/T
2	ZD319		1464	2	48	0	0	163	1.63	60	0	ZD319	ZD319	G/G	C/C	C/C	C/T	G/G	C/T
2	ZD320		1465	1	52	0	0	160	1.6	60	0	ZD320	ZD320	G/G	C/C	T/T	C/T	G/G	C/C
2	ZD321		1466	2	62	0	0	164	1.64	64	0	ZD321	ZD321	G/G	C/C	C/C	C/C	G/G	C/T
2	ZD322		1467	2	61	0	0	160	1.6	52.5	0	ZD322	ZD322	G/A	C/C	C/T	C/C	G/C	C/T
2	ZD323		1468	1	56	0	0	170	1.7	70	1	ZD323	ZD323	G/G	C/C	C/C	C/C	G/G	T/T
2	ZD324		1469	1	57	0	0	173	1.73	80	1	ZD324	ZD324	G/G	C/C	C/C	C/C	G/G	C/C
2	ZD326		1470	1	61	1	1	165	1.65	65	0	ZD326	ZD326	G/G	C/C	C/C	C/T	G/G	T/T
2	ZD327		1471	2	65	0	0	160	1.6	59	0	ZD327	ZD327	G/G	C/C	C/C	C/T	G/G	C/T
2	ZD328		1472	1	69	0	0	173	1.73	68	0	ZD328	ZD328	G/G	C/C	C/T	C/T	G/G	C/T
2	ZD330		1473	1	75	1	1	168	1.68	65	0	ZD330	ZD330	G/G	C/C	T/T	C/T	G/G	C/C
2	ZD331		1474	2	68	0	0	154	1.54	48	0	ZD331	ZD331	G/G	C/C	C/T	C/C	G/G	C/C
2	ZD332		1475	1	60	1	0	170	1.7	60	0	ZD332	ZD332	G/G	C/C	C/C	C/C	G/G	C/T
2	ZD333		1476	1	65	0	0	170	1.7	70	1	ZD333	ZD333	G/G	C/C	C/C	C/C	G/G	T/T
2	ZD334		1477	2	56	0	0	160	1.6	60	0	ZD334	ZD334	G/G	C/C	C/T	C/T	G/G	C/T
2	ZD335		1478	1	50	0	1	165	1.65	65	0	ZD335	ZD335	G/G	C/C	C/T	C/C	G/G	C/T
2	ZD336		1479	1	49	0	0	165	1.65	65	0	ZD336	ZD336	G/G	C/C	C/C	C/C	G/G	C/T
2	ZD337		1480	2	47	0	0	168	1.68	72	1	ZD337	ZD337	G/G	C/C	C/T	C/C	G/G	C/T
2	ZD339		1481	2	71	0	0	155	1.55	63	1	ZD339	ZD339	G/G	C/C	C/T	C/C	G/G	C/T
2	ZD341		1482	1	71	0	0	173	1.73	74	1	ZD341	ZD341	G/G	C/C	C/T	C/C	G/G	C/T
2	ZD342		1483	1	69	0	0	174	1.74	64	0	ZD342	ZD342	G/G	C/C	C/C	C/C	G/G	T/T
2	ZD343		1484	1	74	0	0	173	1.73	58	0	ZD343	ZD343	G/G	C/C	C/T	C/C	G/G	C/C
2	ZD345		1485	2	64	0	0	155	1.55	55	0	ZD345	ZD345	G/G	C/C	C/C	C/C	G/G	C/T
2	ZD346		1486	2	72	0	0	155	1.55	54	0	ZD346	ZD346	G/A	C/C	C/C	C/T	G/C	T/T
2	ZD347		1487	1	70	1	0	179	1.79	80	1	ZD347	ZD347	G/G	G/C	C/T	C/T	G/G	C/T
2	ZD348		1488	1	71	1	1	168	1.68	70	1	ZD348	ZD348	G/G	C/C	C/C	C/C	G/G	T/T
2	ZD350		1489	2	61	0	0	172	1.72	80	1	ZD350	ZD350	G/G	C/C	C/T	C/C	G/G	C/C
2	ZD351		1490	2	60	0	0	160	1.6	54	0	ZD351	ZD351	G/G	C/C	C/C	T/T	G/G	C/T
2	ZD352		1491	2	66	0	0	165	1.65	75	1	ZD352	ZD352	G/G	C/C	C/T	C/C	G/G	C/T
2	ZD353		1492	1	72	1	0	174	1.74	81	1	ZD353	ZD353	G/G	C/C	C/C	C/T	G/G	C/C
2	ZD355		1493	1	69	1	0	163	1.63	62	0	ZD355	ZD355	G/G	C/C	C/C	C/C	G/G	T/T
2	ZD356		1494	2	75	0	0	161	1.61	70	1	ZD356	ZD356	G/G	G/C	C/C	C/T	G/G	C/T
2	ZD357		1495	2	43	0	0	155	1.55	68	1	ZD357	ZD357	G/G	C/C	C/C	C/C	G/G	C/T
2	ZD358		1496	1	75	1	1	178	1.78	71	0	ZD358	ZD358	G/G	G/C	C/C	C/T	G/G	C/T
2	ZD360		1497	2	66	0	0	160	1.6	73	1	ZD360	ZD360	G/G	C/C	C/C	C/C	G/G	C/T
2	ZD361		1498	1	58	0	0	170	1.7	64	0	ZD361	ZD361	G/A	C/C	C/C	C/C	G/C	C/T
2	ZD362		1499	1	67	0	0	170	1.7	70	1	ZD362	ZD362	G/A	C/C	C/C	C/C	G/C	C/C
2	ZD363		1500	1	58	0	1	180	1.8	90	1	ZD363	ZD363	G/G	C/C	C/C	C/C	G/G	T/T
2	ZD364		1501	1	62	0	0	174	1.74	79	1	ZD364	ZD364	G/G	C/C	C/C	C/C	G/G	C/T
2	ZD365		1502	1	67	0	0	160	1.6	55	0	ZD365	ZD365	G/G	C/C	C/C	C/C	G/G	T/T
2	ZD366		1503	1	67	1	1	173	1.73	65	0	ZD366	ZD366	G/G	C/C	C/C	C/C	G/G	C/T
2	ZD367		1504	1	73	1	0	180	1.8	70	0	ZD367	ZD367	G/A	C/C	C/C	C/C	G/C	T/T
2	ZD368		1505	2	66	0	0	160	1.6	70	1	ZD368	ZD368	G/G	C/C	C/T	C/C	G/G	C/T
2	ZD371		1506	1	72	0	0	170	1.7	70	1	ZD371	ZD371	G/G	C/C	C/C	C/C	G/G	C/C
2	ZD372		1507	2	61	0	0	155	1.55	55	0	ZD372	ZD372	G/G	C/C	C/C	C/C	G/G	C/C
2	ZD374		1508	1	66	1	0	174	1.74	70	0	ZD374	ZD374	G/G	C/C	C/C	C/T	G/G	C/T
2	ZD375		1509	1	74	0	1	165	1.65	65	0	ZD375	ZD375	G/G	C/C	C/C	C/T	G/G	T/T
2	ZD376		1510	2	61	0	0	164	1.64	64	0	ZD376	ZD376	G/G	C/C	C/T	C/C	G/G	C/T
2	ZD377		1511	2	70	0	0	160	1.6	70	1	ZD377	ZD377	G/G	C/C	C/C	T/T	G/G	T/T
2	ZD378		1512	2	76	0	0	156	1.56	70	1	ZD378	ZD378	G/G	C/C	C/C	C/T	G/G	C/T
2	ZD379		1513	1	70	1	0	172	1.72	74	1	ZD379	ZD379	G/G	C/C	C/C	C/T	G/G	C/T
2	ZD380		1514	1	73	0	0	174	1.74	68	0	ZD380	ZD380	G/G	C/C	C/C	C/C	G/G	T/T
2	ZD381		1515	1	75	0	1	174	1.74	70	0	ZD381	ZD381	G/G	C/C	C/C	T/T	G/G	C/T
2	ZD382		1516	1	71	0	0	178	1.78	93	1	ZD382	ZD382	G/G	C/C	C/T	C/C	G/G	C/T
2	ZD383		1517	1	69	1	1	169	1.69	80	1	ZD383	ZD383	G/G	C/C	C/C	C/C	G/G	T/T
2	ZD384		1518	2	72	0	0	150	1.5	67	1	ZD384	ZD384	G/G	G/C	T/T	C/T	G/G	C/C
2	ZD386		1519	2	75	0	0	164	1.64	65	1	ZD386	ZD386	G/G	G/C	C/T	C/T	G/G	C/T
2	ZD388		1520	1	60	0	0	171	1.71	48	0	ZD388	ZD388	G/G	C/C	C/T	C/T	G/G	C/T
2	ZD389		1521	2	72	0	0	158	1.58	61	1	ZD389	ZD389	G/G	G/C	C/C	C/T	G/G	T/T
2	ZD390		1522	1	68	0	0	177	1.77	79	1	ZD390	ZD390	G/G	C/C	T/T	C/T	G/G	C/C
2	ZD392		1523	1	56	0	0	166	1.66	77	1	ZD392	ZD392	G/G	C/C	C/T	C/T	G/G	C/T
2	ZD393		1524	1	66	0	0	167	1.67	60	0	ZD393	ZD393	G/G	C/C	C/C	C/T	G/G	C/C
2	ZD394		1525	2	51	0	0	160	1.6	46	0	ZD394	ZD394	G/G	C/C	C/C	C/T	G/G	C/T
2	ZD395		1526	1	70	1	1	178	1.78	85	1	ZD395	ZD395	G/G	C/C	C/C	C/T	G/G	C/T
2	ZD396		1527	1	70	1	0	169	1.69	64	0	ZD396	ZD396	G/G	C/C	C/C	C/C	G/G	C/C
2	ZD397		1528	1	47	1	1	175	1.75	82	1	ZD397	ZD397	G/G	C/C	C/C	C/C	G/G	C/C
2	ZD399		1529	2	72	0	0	156	1.56	50	0	ZD399	ZD399	G/G	C/C	C/C	T/T	G/G	C/C
2	ZD402		1530	2	74	0	0	160	1.6	59	0	ZD402	ZD402	G/G	C/C	C/C	C/C	G/G	C/T
2	ZD404		1531	2	59	0	0	161	1.61	55	0	ZD404	ZD404	G/G	G/C	C/T	C/T	G/G	C/T
2	ZD405		1532	1	69	0	0	168	1.68	80	1	ZD405	ZD405	G/G	C/C	C/C	C/C	G/G	C/T
2	ZD407		1533	1	74	0	0	170	1.7	65	0	ZD407	ZD407	G/G	C/C	C/C	C/T	G/G	T/T
2	ZD408		1534	1	64	0	0	174	1.74	68	0	ZD408	ZD408	G/G	C/C	C/C	C/T	G/G	C/T
2	ZD410		1535	2	66	0	0	160	1.6	48	0	ZD410	ZD410	G/G	C/C	C/T	C/C	G/G	C/T
2	ZD411		1536	1	71	1	1	168	1.68	70	1	ZD411	ZD411	G/A	C/C	C/C	C/C	G/C	T/T
2	ZD412		1537	2	72	0	0	165	1.65	78	1	ZD412	ZD412	G/G	C/C	C/C	C/C	G/G	T/T
2	ZD413		1538	1	65	0	1	174	1.74	75	1	ZD413	ZD413	G/G	C/C	C/C	C/T	G/G	C/C
2	ZD414		1539	2	67	0	0	160	1.6	65	1	ZD414	ZD414	G/G	C/C	C/T	T/T	G/G	C/T
2	ZD418		1540	2	59	0	0	165	1.65	62	0	ZD418	ZD418	G/G	C/C	C/T	C/T	G/G	C/C
2	ZD419		1541	2	53	0	0	160	1.6	50	0	ZD419	ZD419	G/A	C/C	C/C	C/C	G/C	C/C
2	ZD420		1542	1	66	1	1	170	1.7	74	1	ZD420	ZD420	G/G	C/C	C/T	C/T	G/G	C/T
2	ZD421		1543	2	75	0	0	152	1.52	70	1	ZD421	ZD421	G/G	C/C	C/T	C/C	G/G	C/T
2	ZD422		1544	1	50	0	0	167	1.67	75	1	ZD422	ZD422	G/G	C/C	C/T	C/C	G/G	C/T
2	ZD423		1545	1	67	0	0	175	1.75	85	1	ZD423	ZD423	G/G	G/C	T/T	C/T	G/G	C/C
2	ZD425		1546	2	50	0	0	160	1.6	55	0	ZD425	ZD425	G/G	C/C	C/T	C/C	G/G	C/T
2	ZD426		1547	1	69	0	1	171	1.71	76	1	ZD426	ZD426	G/G	C/C	C/T	C/T	G/G	C/C
2	ZD427		1548	2	69	0	0	152	1.52	50	0	ZD427	ZD427	G/G	G/C	C/C	C/C	G/G	C/T
2	ZD428		1549	1	63	1	0	170	1.7	68	0	ZD428	ZD428	G/G	C/C	C/C	C/C	G/G	C/T
2	ZD429		1550	1	52	0	0	170	1.7	58	0	ZD429	ZD429	G/A	G/C	C/C	C/C	G/C	C/C
2	ZD430		1551	2	69	0	0	158	1.58	56	0	ZD430	ZD430	G/A	C/C	C/C	C/T	G/C	C/T
2	ZD431		1552	1	75	0	0	160	1.6	60	0	ZD431	ZD431	G/G	G/C	C/C	C/T	G/G	C/C
2	ZD432		1553	1	76	1	0	178	1.78	60	0	ZD432	ZD432	G/G	G/C	C/T	C/T	G/G	C/T
2	ZD433		1554	1	71	1	0	176	1.76	80	1	ZD433	ZD433	G/G	C/C	C/T	C/C	G/G	C/T
2	ZD436		1555	1	61	0	1	168	1.68	67	0	ZD436	ZD436	G/G	C/C	C/T	C/C	G/G	C/T
2	ZD437		1556	1	73	0	0	168	1.68	68	1	ZD437	ZD437	G/G	C/C	C/T	C/C	G/G	C/C
2	ZD438		1557	2	68	0	0	168	1.68	65	0	ZD438	ZD438	G/G	C/C	C/C	C/C	G/G	C/T
2	ZD439		1558	1	61	1	1	178	1.78	87	1	ZD439	ZD439	G/G	C/C	C/T	C/T	G/G	C/T
2	ZD440		1559	2	61	0	0	160	1.6	61	0	ZD440	ZD440	G/A	G/C	C/T	C/T	G/C	C/C
2	ZD441		1560	1	73	1	0	174	1.74	82	1	ZD441	ZD441	G/A	C/C	C/C	C/C	G/C	T/T
2	ZD442		1561	1	62	0	0	179	1.79	80	1	ZD442	ZD442	G/G	G/C	C/C	C/C	G/G	C/C
2	ZD443		1562	1	52	1	0	173	1.73	66	0	ZD443	ZD443	G/G	C/C	C/C	C/T	G/G	C/T
2	ZD444		1563	1	62	1	1	165	1.65	75	1	ZD444	ZD444	G/G	G/C	C/C	C/T	G/G	C/T
2	ZD445		1564	2	53	0	0	156	1.56	72	1	ZD445	ZD445	G/G	C/C	C/C	C/T	G/G	C/T
2	ZD446		1565	1	74	0	0	172	1.72	58	0	ZD446	ZD446	G/G	C/C	C/C	C/C	G/G	C/T
2	ZD447		1566	1	58	1	1	175	1.75	66	0	ZD447	ZD447	G/G	C/C	C/T	C/T	G/G	C/T
2	ZD449		1567	2	74	0	0	152	1.52	64	1	ZD449	ZD449	G/G	C/C	C/C	C/C	G/G	C/C
2	ZD450		1568	2	67	0	0	156	1.56	70	1	ZD450	ZD450	G/G	G/C	C/C	C/C	G/G	T/T
2	ZD453		1569	2	83	0	0	160	1.6	55	0	ZD453	ZD453	G/G	C/C	C/C	C/C	G/G	T/T
2	ZD454		1570	1	76	0	0	170	1.7	80	1	ZD454	ZD454	G/G	C/C	C/T	C/T	G/G	C/T
2	ZD455		1571	1	44	1	0	170	1.7	60	0	ZD455	ZD455	G/G	C/C	C/T	C/T	G/G	C/C
2	ZD456		1572	2	73	0	0	164	1.64	62	0	ZD456	ZD456	G/G	C/C	C/T	C/C	G/G	C/C
2	ZD457		1573	1	49	0	0	182	1.82	75	0	ZD457	ZD457	G/G	G/C	T/T	C/T	G/G	C/C
2	ZD458		1574	1	70	1	0	168	1.68	75	1	ZD458	ZD458	G/G	C/C	C/C	C/T	G/G	C/T
2	ZD459		1575	2	64	0	0	155	1.55	50	0	ZD459	ZD459	G/G	C/C	C/T	C/C	G/G	C/C
2	ZD460		1576	1	73	1	1	170	1.7	70	1	ZD460	ZD460	G/G	G/C	C/T	C/T	G/G	C/C
2	ZD461		1577	1	73	0	1	180	1.8	80	1	ZD461	ZD461	G/G	G/C	C/C	C/T	G/G	C/T
2	ZD462		1578	2	61	0	0	158	1.58	60	1	ZD462	ZD462	G/G	C/C	C/T	C/C	G/G	C/T
2	ZD463		1579	1	65	1	1	178	1.78	78	1	ZD463	ZD463	G/G	C/C	C/C	C/T	G/G	T/T
2	ZD465		1580	1	76	0	0	180	1.8	68	0	ZD465	ZD465	G/G	C/C	C/C	C/T	G/G	C/C
2	ZD466		1581	1	69	1	0	176	1.76	75	1	ZD466	ZD466	G/G	C/C	C/C	C/C	G/G	T/T
2	ZD467		1582	1	76	0	0	170	1.7	67	0	ZD467	ZD467	G/G	G/C	C/T	C/T	G/G	C/C
2	ZD468		1583	2	68	0	0	158	1.58	60	1	ZD468	ZD468	G/G	C/C	C/C	C/T	G/G	C/C
2	ZD469		1584	1	70	1	1	169	1.69	65	0	ZD469	ZD469	G/G	G/C	C/T	C/T	G/G	C/T
2	ZD470		1585	1	64	1	1	180	1.8	78	1	ZD470	ZD470	G/G	C/C	C/C	C/T	G/G	T/T
2	ZD471		1586	2	62	0	0	165	1.65	67	1	ZD471	ZD471	G/G	C/C	C/C	C/C	G/G	T/T
2	ZD472		1587	1	64	0	0	168	1.68	81	1	ZD472	ZD472	G/G	C/C	C/T	C/T	G/G	C/C
2	ZD475		1588	1	50	0	1	166	1.66	62.5	0	ZD475	ZD475	G/G	C/C	C/T	C/C	G/G	C/T
2	ZD476		1589	1	46	0	0	185	1.85	87	1	ZD476	ZD476	G/G	C/C	C/T	C/T	G/G	C/C
2	ZD477		1590	1	51	1	1	174	1.74	86	1	ZD477	ZD477	G/G	C/C	C/C	C/C	G/G	T/T
2	ZD478		1591	1	59	0	0	173	1.73	65	0	ZD478	ZD478	G/A	C/C	C/C	C/C	G/C	C/T
2	ZD479		1592	1	71	0	0	180	1.8	70	0	ZD479	ZD479	G/G	C/C	C/T	C/C	G/G	C/T
2	ZD480		1593	1	74	0	0	175	1.75	80	1	ZD480	ZD480	G/G	C/C	C/T	C/T	G/G	C/C
2	ZD482		1594	1	70	0	0	168	1.68	85	1	ZD482	ZD482	G/G	C/C	C/T	C/C	G/G	C/T
2	ZD483		1595	1	69	0	0	170	1.7	75	1	ZD483	ZD483	G/A	C/C	C/T	C/C	G/C	C/T
2	ZD484		1596	1	68	1	0	172	1.72	84	1	ZD484	ZD484	G/G	C/C	C/C	C/C	G/G	T/T
2	ZD485		1597	1	58	0	1	177	1.77	88	1	ZD485	ZD485	G/G	C/C	C/C	C/C	G/G	C/T
2	ZD486		1598	1	72	1	0	160	1.6	71	1	ZD486	ZD486	G/G	C/C	C/T	C/C	G/G	C/T
2	ZD489		1599	1	66	1	0	183	1.83	87	1	ZD489	ZD489	G/G	C/C	C/C	C/T	G/G	C/C
2	ZD490		1600	1	70	0	0	173	1.73	71	0	ZD490	ZD490	G/G	C/C	C/C	C/C	G/G	C/C
2	ZD497		1601	2	48	0	0	168	1.68	65	0	ZD497	ZD497	G/G	C/C	C/T	C/C	G/G	C/C
2	ZD498		1602	1	76	1	1	163	1.63	57	0	ZD498	ZD498	G/G	C/C	C/C	C/C	G/G	C/T
2	ZD501		1603	1	61	0	0	173	1.73	85	1	ZD501	ZD501	G/G	C/C	C/T	C/C	G/G	C/T
2	ZD503		1604	1	67	0	0	158	1.58	65	1	ZD503	ZD503	G/G	C/C	C/T	C/C	G/G	C/C
2	ZD504		1605	1	75	0	0	173	1.73	83	1	ZD504	ZD504	G/G	C/C	C/T	C/T	G/G	C/T
2	ZD505		1606	1	61	0	1	170	1.7	70	1	ZD505	ZD505	G/G	C/C	C/C	C/C	G/G	T/T
2	ZD506		1607	1	74	0	1	172	1.72	86	1	ZD506	ZD506	G/G	C/C	C/T	C/C	G/G	C/T
2	ZD508		1608	1	74	0	0	170	1.7	67	0	ZD508	ZD508	G/G	C/C	C/T	C/C	G/G	C/T
2	ZD509		1609	1	61	1	0	170	1.7	70	1	ZD509	ZD509	G/G	C/C	C/C	C/C	G/G	C/T
2	ZD510		1610	1	62	0	1	170	1.7	63	0	ZD510	ZD510	G/G	C/C	C/C	C/C	G/G	C/C
2	ZD511		1611	1	72	1	1	177	1.77	85	1	ZD511	ZD511	G/G	G/C	C/T	C/T	G/G	C/T
2	ZD513		1612	1	60	1	0	170	1.7	85	1	ZD513	ZD513	G/G	C/C	C/C	C/C	G/G	C/T
2	ZD514		1613	1	72	0	0	170	1.7	80	1	ZD514	ZD514	G/G	C/C	C/T	C/T	G/G	C/C
2	ZD516		1614	1	73	1	0	165	1.65	63	0	ZD516	ZD516	G/G	C/C	C/C	C/C	G/G	T/T
2	ZD519		1615	1	83	0	0	162	1.62	60	0	ZD519	ZD519	G/G	C/C	C/C	C/T	G/G	C/T
2	ZD521		1616	1	73	0	1	160	1.6	68	1	ZD521	ZD521	G/G	C/C	C/C	C/T	G/G	C/T
2	ZD523		1617	2	41	0	0	160	1.6	60	0	ZD523	ZD523	A/A	C/C	C/C	C/C	C/C	C/T
2	ZD524		1618	1	71	0	0	160	1.6	69	1	ZD524	ZD524	G/G	G/C	C/C	T/T	G/G	T/T
2	ZD528		1619	1	58	1	0	176	1.76	80	1	ZD528	ZD528	G/G	G/C	C/C	C/C	G/G	C/T
2	ZD530		1620	1	61	1	1	177	1.77	74	0	ZD530	ZD530	G/G	C/C	C/C	C/C	G/G	C/C
2	ZD531		1621	2	49	0	0	162	1.62	59	0	ZD531	ZD531	G/G	C/C	C/T	C/C	G/G	C/T
2	ZD532		1622	1	72	1	0	172	1.72	69	0	ZD532	ZD532	G/G	C/C	C/T	C/T	G/G	C/T
2	ZD533		1623	1	72	0	0	170	1.7	75	1	ZD533	ZD533	G/G	C/C	C/C	C/T	G/G	C/T
2	ZD535		1624	2	66	0	0	157	1.57	50	0	ZD535	ZD535	G/G	C/C	T/T	C/C	G/G	C/C
2	ZD536		1625	1	68	0	0	168	1.68	62	0	ZD536	ZD536	G/A	C/C	C/T	C/T	G/C	C/T
2	ZD537		1626	1	62	1	0	165	1.65	60	0	ZD537	ZD537	G/G	G/C	C/C	C/T	G/G	C/T
2	ZD539		1627	2	45	0	0	165	1.65	65	0	ZD539	ZD539	G/G	C/C	C/T	C/C	G/G	C/C
2	ZD540		1628	1	71	0	1	168	1.68	62	0	ZD540	ZD540	G/G	C/C	C/C	T/T	G/G	C/T
2	ZD541		1629	1	59	0	0	170	1.7	70	1	ZD541	ZD541	G/G	C/C	C/C	C/T	G/G	C/T
2	ZD543		1630	2	45	0	0	155	1.55	58	1	ZD543	ZD543	G/G	C/C	C/C	C/C	G/G	T/T
2	ZD544		1631	1	71	0	0	158	1.58	63	1	ZD544	ZD544	G/G	C/C	C/C	C/T	G/G	T/T
2	ZD545		1632	1	61	0	0	180	1.8	70	0	ZD545	ZD545	G/G	C/C	C/T	C/C	G/G	C/T
2	ZD546		1633	1	66	1	1	170	1.7	63	0	ZD546	ZD546	G/G	C/C	C/C	C/C	G/G	T/T
2	ZD547		1634	2	46	0	0	160	1.6	70	1	ZD547	ZD547	G/A	C/C	C/C	C/C	G/C	C/T
2	ZD548		1635	2	67	0	0	152	1.52	55	0	ZD548	ZD548	G/G	C/C	C/T	C/C	G/G	C/C
2	ZD550		1636	1	52	0	0	180	1.8	83	1	ZD550	ZD550	G/G	C/C	C/C	C/C	G/G	T/T
2	ZD551		1637	1	65	1	0	167	1.67	65	0	ZD551	ZD551	G/A	C/C	C/C	C/C	G/C	C/T
2	ZD552		1638	1	53	0	0	165	1.65	60	0	ZD552	ZD552	G/G	C/C	C/C	T/T	G/G	C/T
2	ZD553		1639	2	65	0	0	158	1.58	54	0	ZD553	ZD553	G/G	C/C	C/C	C/C	G/G	C/T
2	ZD554		1640	1	64	1	1	176	1.76	77	1	ZD554	ZD554	G/G	C/C	C/C	C/C	G/G	C/T
2	ZD555		1641	1	61	1	1	168	1.68	68	1	ZD555	ZD555	G/G	C/C	C/C	C/T	G/G	C/T
2	ZD556		1642	1	71	1	0	170	1.7	65	0	ZD556	ZD556	G/G	C/C	C/C	C/C	G/G	C/T
2	ZD557		1643	1	75	0	0	174	1.74	75	1	ZD557	ZD557	G/G	C/C	C/C	C/T	G/G	T/T
2	ZD558		1644	2	74	0	0	154	1.54	50	0	ZD558	ZD558	G/G	C/C	C/C	C/C	G/G	C/C
2	ZD559		1645	1	58	1	1	170	1.7	75	1	ZD559	ZD559	G/G	C/C	C/C	C/C	G/G	C/T
2	ZD560		1646	2	62	0	0	160	1.6	51	0	ZD560	ZD560	G/G	C/C	C/C	C/T	G/G	T/T
2	ZD563		1647	1	57	1	0	176	1.76	75	1	ZD563	ZD563	G/G	C/C	C/C	C/C	G/G	C/T
2	ZD564		1648	1	75	0	0	170	1.7	65	0	ZD564	ZD564	G/G	C/C	C/C	C/C	G/G	C/C
2	ZD565		1649	1	64	1	0	173	1.73	65	0	ZD565	ZD565	G/G	C/C	C/C	C/C	G/G	C/T
2	ZD568		1650	2	55	0	0	159	1.59	55	0	ZD568	ZD568	G/G	C/C	C/T	C/C	G/G	C/T
2	ZD569		1651	2	59	0	0	158	1.58	74	1	ZD569	ZD569	G/G	C/C	C/C	C/C	G/G	C/T
2	ZD570		1652	2	59	1	1	160	1.6	70	1	ZD570	ZD570	G/G	G/C	C/T	C/C	G/G	C/C
2	ZD573		1653	1	74	1	1	165	1.65	60	0	ZD573	ZD573	G/G	C/C	C/T	C/C	G/G	C/C
2	ZD574		1654	2	57	0	0	160	1.6	63	1	ZD574	ZD574	G/G	C/C	C/C	C/C	G/G	C/T
2	ZD575		1655	1	59	1	0	166	1.66	65	0	ZD575	ZD575	G/G	C/C	C/C	C/C	G/G	C/C
2	ZD577		1656	1	59	0	0	170	1.7	75	1	ZD577	ZD577	G/G	C/C	C/C	C/T	G/G	C/T
2	ZD578		1657	2	58	0	0	165	1.65	70	1	ZD578	ZD578	G/G	C/C	C/T	C/C	G/G	C/C
2	ZD579		1658	2	72	0	0	164	1.64	72	1	ZD579	ZD579	G/G	C/C	C/C	C/T	G/G	C/T
2	ZD580		1659	1	71	1	1	162	1.62	56	0	ZD580	ZD580	G/G	C/C	C/C	C/C	G/G	C/T
2	ZD581		1660	1	76	0	0	176	1.76	75	1	ZD581	ZD581	G/G	C/C	C/T	C/C	G/G	C/T
2	ZD582		1661	1	60	1	1	165	1.65	63	0	ZD582	ZD582	G/G	C/C	C/T	C/C	G/G	C/C
2	ZD583		1662	2	64	0	0	171	1.71	77	1	ZD583	ZD583	G/G	C/C	T/T	C/T	G/G	C/C
2	ZD585		1663	1	60	0	0	170	1.7	54	0	ZD585	ZD585	G/G	C/C	C/T	C/T	G/G	C/C
2	ZD586		1664	1	75	1	0	164	1.64	60	0	ZD586	ZD586	G/G	C/C	C/C	C/T	G/G	T/T
2	ZD587		1665	1	53	0	0	165	1.65	64	0	ZD587	ZD587	G/G	C/C	C/C	C/C	G/G	C/T
2	ZD589		1666	1	63	0	0	170	1.7	70	1	ZD589	ZD589	G/G	C/C	C/T	C/C	G/G	C/T
2	ZD590		1667	1	46	0	0	169	1.69	95	1	ZD590	ZD590	G/G	C/C	C/T	C/C	G/G	C/T
2	ZD591		1668	1	44	0	0	175	1.75	88	1	ZD591	ZD591	G/G	C/C	C/C	C/C	G/G	C/T
2	ZD592		1669	1	66	1	0	171	1.71	66	0	ZD592	ZD592	G/G	C/C	C/C	C/T	G/G	C/T
2	ZD593		1670	1	74	1	0	172	1.72	69	0	ZD593	ZD593	G/G	G/C	C/C	C/T	G/G	T/T
2	ZD594		1671	1	53	1	1	176	1.76	68	0	ZD594	ZD594	G/G	C/C	C/T	C/C	G/G	C/C
2	ZD595		1672	2	74	0	0	158	1.58	55	0	ZD595	ZD595	G/G	C/C	C/C	C/C	G/G	T/T
2	ZD596		1673	2	62	0	0	164	1.64	60	0	ZD596	ZD596	G/G	C/C	C/C	C/C	G/G	C/C
2	ZD597		1674	2	63	0	0	160	1.6	56	0	ZD597	ZD597	G/G	C/C	C/C	C/C	G/G	T/T
2	ZD598		1675	1	74	0	0	160	1.6	66	1	ZD598	ZD598	G/G	C/C	C/C	C/C	G/G	C/T
2	ZD599		1676	1	51	1	1	172	1.72	86	1	ZD599	ZD599	G/G	G/C	C/T	C/T	G/G	C/T
2	ZD600		1677	1	58	0	1	170	1.7	55	0	ZD600	ZD600	G/G	G/G	C/T	C/T	G/G	C/T
2	ZD602		1678	1	57	0	0	162	1.62	68	1	ZD602	ZD602	G/G	C/C	C/T	C/C	G/G	C/C
2	ZD603		1679	2	56	0	0	163	1.63	65	1	ZD603	ZD603	G/G	C/C	C/T	C/C	G/G	C/T
2	ZD604		1680	1	67	0	0	170	1.7	75	1	ZD604	ZD604	G/G	C/C	C/T	T/T	G/G	C/T
2	ZD605		1681	1	67	1	1	174	1.74	75	1	ZD605	ZD605	G/G	C/C	C/C	C/C	G/G	C/C
2	1		1682	1	57	0	0	172	1.72	63	0	1	GN0001	G/G	G/C	C/C	C/T	G/G	C/C
2	2		1683	1	54	0	0	170	1.7	75	1	2	GN0002	G/G	C/C	C/C	C/C	G/G	T/T
2	3		1684	1	52	0	0	167	1.67	58	0	3	GN0003	G/G	C/C	C/C	C/C	G/G	T/T
2	4		1685	2	52	0	0	155	1.55	56	0	4	GN0004	G/G	C/C	C/C	C/C	G/G	C/C
2	5		1686	1	53	0	0	167	1.67	58	0	5	GN0005	G/G	C/C	C/T	C/C	G/G	C/T
2	6		1687	1	59	0	0	172	1.72	65	0	6	GN0006	G/G	C/C	C/C	C/C	G/G	T/T
2	13		1688	1	61	0	0	170	1.7	65	0	13	GN0013	G/G	C/C	C/T	C/T	G/G	C/T
2	14		1689	2	66	0	0	158	1.58	55	0	14	GN0014	G/G	C/C	C/T	C/C	G/G	C/C
2	15		1690	2	71	0	0	150	1.5	51	0	15	GN0015	G/G	C/C	C/C	C/C	G/G	T/T
2	25		1691	1	63	0	0	165	1.65	60	0	25	GN0025	G/G	C/C	C/C	C/C	G/G	C/T
2	32		1692	1	57	0	0	170	1.7	70	1	32	GN0032	G/A	C/C	C/C	C/C	G/C	C/T
2	34		1693	1	67	0	0	170	1.7	67	0	34	GN0034	G/G	C/C	C/T	C/C	G/G	C/T
2	35		1694	1	65	0	0	170	1.7	76	1	35	GN0035	G/G	G/C	C/T	C/T	G/G	C/T
2	36		1695	1	56	0	0	168	1.68	68	1	36	GN0036	G/G	C/C	T/T	C/T	G/G	C/C
2	38		1696	1	67	0	0	170	1.7	67	0	38	GN0038	G/G	C/C	C/C	C/T	G/G	T/T
2	40		1697	1	71	1	1	170	1.7	65	0	40	GN0040	G/G	C/C	C/C	C/C	G/G	C/T
2	41		1698	1	65	0	0	169	1.69	68	0	41	GN0041	G/G	C/C	C/C	C/C	G/G	C/T
2	42		1699	1	55	0	0	171	1.71	70	0	42	GN0042	G/A	C/C	C/C	C/C	G/C	C/T
2	43		1700	1	68	0	0	170	1.7	80	1	43	GN0043	G/G	C/C	C/C	C/C	G/G	C/T
2	44		1701	2	53	0	0	172	1.72	60	0	44	GN0044	G/G	C/C	C/C	C/T	G/G	T/T
2	46		1702	2	65	0	0	157	1.57	58	0	46	GN0046	G/G	C/C	C/T	C/T	G/G	C/T
2	47		1703	2	72	0	0	162	1.62	60	0	47	GN0047	G/G	C/C	C/T	C/C	G/G	C/T
2	48		1704	1	65	1	0	168	1.68	70	1	48	GN0048	G/G	G/C	C/T	C/T	G/G	C/C
2	49		1705	1	65	1	0	171	1.71	65	0	49	GN0049	G/G	G/C	C/C	T/T	G/G	C/C
2	50		1706	2	68	0	0	160	1.6	75	1	50	GN0050	G/G	G/C	C/C	C/T	G/G	T/T
2	53		1707	1	62	0	0	168	1.68	80	1	53	GN0053	G/G	C/C	C/C	C/T	G/G	C/T
2	54		1708	1	52	0	0	168	1.68	80	1	54	GN0054	G/G	C/C	C/T	C/C	G/G	C/C
2	55		1709	1	70	1	1	170	1.7	64	0	55	GN0055	G/G	C/C	C/T	C/T	G/G	C/C
2	59		1710	1	59	0	0	188	1.88	88	1	59	GN0059	G/G	C/C	C/C	C/T	G/G	C/C
2	60		1711	1	71	0	0	155	1.55	66	1	60	GN0060	G/G	C/C	C/C	C/T	G/G	C/C
2	61		1712	1	64	0	0	169	1.69	65	0	61	GN0061	G/G	C/C	C/C	C/C	G/G	C/C
2	83		1713	1	56	0	0	170	1.7	78	1	83	GN0083	G/G	C/C	C/C	C/C	G/G	C/T
2	84		1714	1	58	0	0	172	1.72	70	0	84	GN0084	G/G	C/C	C/C	C/T	G/G	T/T
2	85		1715	2	49	0	0	172	1.72	80	1	85	GN0085	G/G	G/C	C/T	C/T	G/G	C/T
2	86		1716	1	52	0	0	175	1.75	75	1	86	GN0086	G/G	C/C	C/T	C/C	G/G	C/C
2	89,3		1717	2	56	0	0	153	1.53	44	0	89,3	GN0089	G/G	C/C	C/C	C/C	G/G	C/C
2	91,5		1718	1	72	0	0	170	1.7	63	0	91,5	GN0091	G/G	C/C	C/C	C/C	G/G	T/T
2	100		1719	1	48	0	0	170	1.7	60	0	100	GN0100	G/G	C/C	C/C	C/C	G/G	T/T
2	101		1720	1	64	1	1	170	1.7	62	0	101	GN0101	G/G	C/C	C/C	C/C	G/G	C/T
2	102		1721	2	53	0	0	162	1.62	55	0	102	GN0102	G/G	G/C	C/C	C/C	G/G	C/T
2	103		1722	1	49	0	0	170	1.7	52	0	103	GN0103	G/G	C/C	C/C	C/T	G/G	C/C
2	104		1723	1	61	1	0	168	1.68	55	0	104	GN0104	G/G	C/C	T/T	C/C	G/G	C/C
2	105		1724	2	54	0	0	158	1.58	57	0	105	GN0105	G/G	G/C	C/C	C/T	G/G	C/T
2	106		1725	1	57	1	0	168	1.68	55	0	106	GN0106	G/G	C/C	C/C	C/C	G/G	T/T
2	107		1726	1	58	1	0	170	1.7	78	1	107	GN0107	G/G	C/C	C/T	C/T	G/G	C/T
2	112		1727	2	68	0	0	164	1.64	62	0	112	GN0112	G/G	C/C	C/T	C/C	G/G	C/C
2	127		1728	2	49	0	0	158	1.58	60	1	127	GN0127	G/G	C/C	C/T	C/C	G/G	C/C
2	135		1729	2	61	0	0	158	1.58	50	0	135	GN0135	G/A	C/C	C/T	C/C	G/C	C/T
2	138		1730	2	59	0	0	160	1.6	52	0	138	GN0138	G/G	C/C	C/T	C/C	G/G	C/T
2	141		1731	2	57	0	0	155	1.55	53	0	141	GN0141	G/A	G/C	C/T	T/T	G/C	C/T
2	142		1732	2	71	0	0	160	1.6	63	1	142	GN0142	G/A	C/C	C/C	C/T	G/C	C/T
2	143		1733	1	55	0	0	163	1.63	68	1	143	GN0143	G/G	C/C	C/C	C/C	G/G	C/T
2	144		1734	1	61	1	1	169	1.69	67	0	144	GN0144	G/G	C/C	C/C	C/C	G/G	C/T
2	145		1735	1	53	0	0	170	1.7	76	1	145	GN0145	G/G	C/C	C/T	C/C	G/G	C/C
2	153		1736	1	59	1	0	165	1.65	71	1	153	GN0153	G/A	C/C	C/T	C/C	G/C	C/C
2	154		1737	2	61	0	0	155	1.55	50	0	154	GN0154	G/G	C/C	C/C	C/C	G/G	C/T
2	155		1738	2	70	0	0	158	1.58	61	1	155	GN0155	G/G	C/C	C/T	C/C	G/G	C/T
2	156		1739	1	69	1	0	175	1.75	60	0	156	GN0156	G/G	G/C	C/C	C/T	G/G	C/T
2	157		1740	2	52	0	0	164	1.64	70	1	157	GN0157	G/G	C/C	C/C	C/T	G/G	T/T
2	159		1741	2	58	0	0	158	1.58	53	0	159	GN0159	G/G	C/C	C/T	C/C	G/G	C/C
2	160		1742	1	69	0	0	170	1.7	65	0	160	GN0160	G/G	G/C	C/C	C/T	G/G	T/T
2	161		1743	1	63	0	0	163	1.63	63	0	161	GN0161	G/G	C/C	C/C	C/C	G/G	T/T
2	162		1744	2	64	0	0	158	1.58	59	0	162	GN0162	G/G	C/C	C/C	C/C	G/G	C/T
2	164		1745	2	59	0	0	152	1.52	62	1	164	GN0164	G/G	G/C	C/T	C/T	G/G	C/T
2	165		1746	1	63	0	0	164	1.64	79	1	165	GN0165	G/G	C/C	C/T	C/C	G/G	C/C
2	167		1747	1	63	1	0	173	1.73	70	0	167	GN0167	G/G	C/C	C/T	C/C	G/G	C/T
2	168		1748	2	58	0	0	157	1.57	55	0	168	GN0168	G/G	C/C	C/C	C/T	G/G	C/T
2	169		1749	2	62	0	0	150	1.5	47	0	169	GN0169	G/G	G/C	T/T	C/C	G/G	C/C
2	170		1750	1	69	1	0	175	1.75	72	0	170	GN0170	G/G	C/C	C/T	C/C	G/G	C/T
2	173		1751	1	62	0	0	172	1.72	74	1	173	GN0173	G/G	C/C	C/T	C/C	G/G	C/T
2	175		1752	2	63	0	0	163	1.63	83	1	175	GN0175	G/G	C/C	C/C	C/T	G/G	T/T
2	179		1753	1	63	1	0	170	1.7	75	1	179	GN0179	G/G	C/C	C/C	C/T	G/G	T/T
2	180		1754	1	72	0	0	163	1.63	52	0	180	GN0180	G/G	G/C	C/T	C/C	G/G	C/C
2	183		1755	1	61	0	1	160	1.6	47	0	183	GN0183	G/G	C/C	C/T	C/C	G/G	C/C
2	184		1756	2	59	0	0	155	1.55	53	0	184	GN0184	G/G	C/C	C/C	C/C	G/G	C/T
2	187		1757	2	59	0	0	163	1.63	55	0	187	GN0187	G/G	C/C	C/C	C/C	G/G	C/T
2	188		1758	1	64	0	1	165	1.65	70	1	188	GN0188	G/G	C/C	C/C	C/C	G/G	T/T
2	190		1759	2	59	0	0	163	1.63	62	0	190	GN0190	G/G	G/C	C/C	C/T	G/G	C/C
2	192		1760	1	69	0	0	172	1.72	72	1	192	GN0192	G/A	G/C	C/C	C/T	G/C	T/T
2	193		1761	1	61	1	0	165	1.65	63	0	193	GN0193	G/G	G/C	C/C	C/C	G/G	C/T
2	194		1762	1	60	0	1	170	1.7	60	0	194	GN0194	G/G	C/C	C/T	C/C	G/G	C/C
2	196		1763	1	64	0	0	180	1.8	79	1	196	GN0196	G/G	C/C	C/C	C/C	G/G	T/T
2	199		1764	1	67	0	0	173	1.73	86	1	199	GN0199	G/G	C/C	C/T	C/C	G/G	C/T
2	204		1765	1	65	0	0	169	1.69	70	1	204	GN0204	G/G	G/C	C/C	C/T	G/G	T/T
2	205		1766	1	59	1	0	174	1.74	80	1	205	GN0205	G/G	G/C	C/C	C/T	G/G	C/T
2	206		1767	1	64	0	0	173	1.73	74	1	206	GN0206	G/G	C/C	C/C	C/C	G/G	C/T
2	207		1768	1	63	1	1	170	1.7	71	1	207	GN0207	G/G	C/C	C/C	C/T	G/G	T/T
2	209		1769	1	57	0	0	165	1.65	80	1	209	GN0209	G/A	C/C	C/T	C/T	G/C	C/C
2	213		1770	1	67	1	0	171	1.71	77	1	213	GN0213	G/G	G/C	C/T	C/T	G/G	C/C
2	215		1771	1	66	0	0	170	1.7	65	0	215	GN0215	G/A	C/C	C/C	T/T	G/C	C/T
2	216		1772	1	69	0	0	170	1.7	71	1	216	GN0216	G/G	C/C	C/T	C/C	G/G	C/T
2	219		1773	2	63	0	0	168	1.68	60	0	219	GN0219	G/G	G/C	C/C	C/T	G/G	C/C
2	220		1774	2	60	0	0	155	1.55	95	1	220	GN0220	G/G	C/C	C/T	C/C	G/G	C/T
2	221		1775	1	67	0	0	175	1.75	76	1	221	GN0221	G/G	C/C	C/T	C/T	G/G	C/C
2	224		1776	1	69	0	0	170	1.7	70	1	224	GN0224	G/G	C/C	C/C	C/T	G/G	T/T
2	225		1777	2	59	0	0	160	1.6	73	1	225	GN0225	G/G	G/C	C/T	C/T	G/G	C/T
2	226		1778	1	70	0	0	165	1.65	62	0	226	GN0226	G/G	C/C	C/C	C/T	G/G	T/T
2	231		1779	1	68	1	0	168	1.68	70	1	231	GN0231	G/G	C/C	C/C	C/T	G/G	C/T
2	232		1780	1	65	0	0	170	1.7	69	0	232	GN0232	G/G	C/C	C/C	C/C	G/G	C/T
2	233		1781	1	68	0	0	169	1.69	63	0	233	GN0233	G/A	C/C	C/T	C/C	G/C	C/T
2	234		1782	1	71	0	1	166	1.66	69	1	234	GN0234	G/G	G/C	C/T	C/T	G/G	C/T
2	235		1783	2	63	0	0	160	1.6	75	1	235	GN0235	G/G	C/C	C/C	C/C	G/G	C/T
2	236		1784	1	72	0	0	170	1.7	55	0	236	GN0236	G/G	G/C	C/C	C/T	G/G	C/C
2	237		1785	2	71	0	0	158	1.58	60	1	237	GN0237	G/G	C/C	C/C	C/C	G/G	T/T
2	238		1786	2	59	0	0	162	1.62	65	1	238	GN0238	G/G	C/C	C/C	C/C	G/G	C/C
2	239		1787	1	62	0	0	170	1.7	65	0	239	GN0239	G/G	C/C	C/C	C/T	G/G	T/T
2	240		1788	2	62	0	0	155	1.55	50	0	240	GN0240	G/G	C/C	C/T	C/C	G/G	C/T
2	241		1789	1	65	1	0	168	1.68	62	0	241	GN0241	G/G	C/C	C/C	C/C	G/G	C/T
2	242		1790	1	70	1	1	169	1.69	64	0	242	GN0242	G/G	G/C	C/C	C/T	G/G	C/C
2	243		1791	1	71	0	0	168	1.68	60	0	243	GN0243	G/G	G/C	C/T	C/T	G/G	C/C
2	245		1792	1	72	0	0	167	1.67	74	1	245	GN0245	G/G	C/C	C/T	C/C	G/G	C/C
2	250		1793	1	63	1	1	169	1.69	63.5	0	250	GN0250	G/A	G/C	C/C	C/T	G/C	C/C
2	251		1794	2	56	0	0	162	1.62	60	0	251	GN0251	G/G	C/C	C/C	C/C	G/G	C/C
2	252		1795	1	71	1	0	175	1.75	67	0	252	GN0252	G/G	C/C	C/T	C/T	G/G	C/C
2	265		1796	1	60	0	0	167	1.67	54	0	265	GN0265	G/G	C/C	C/T	C/C	G/G	C/T
2	266		1797	1	54	0	0	169	1.69	60	0	266	GN0266	G/G	C/C	C/C	C/C	G/G	C/T
2	267		1798	1	58	0	0	155	1.55	95	1	267	GN0267	G/G	C/C	C/C	C/C	G/G	T/T
2	268		1799	1	51	0	0	175	1.75	76	1	268	GN0268	G/G	C/C	T/T	C/T	G/G	C/C
2	269		1800	1	55	0	0	168	1.68	64	0	269	GN0269	G/G	G/C	C/T	C/T	G/G	C/T
2	270		1801	1	71	1	0	164	1.64	62	0	270	GN0270	G/G	C/C	C/T	C/T	G/G	C/T
2	271		1802	1	59	0	0	170	1.7	70	1	271	GN0271	G/G	C/C	C/T	T/T	G/G	C/T
2	272		1803	1	54	0	0	160	1.6	73	1	272	GN0272	?	?	?	?	?	?
2	273		1804	2	55	0	0	155	1.55	62	1	273	GN0273	G/G	C/C	C/C	C/T	G/G	T/T
2	274		1805	1	59	0	0	150	1.5	50	0	274	GN0274	G/G	C/C	C/C	C/C	G/G	T/T
2	275		1806	1	54	0	0	165	1.65	60	0	275	GN0275	G/G	C/C	C/C	C/C	G/G	C/T
2	276		1807	1	69	1	1	170	1.7	65	0	276	GN0276	G/G	C/C	C/C	C/C	G/G	C/T
2	277		1808	2	62	0	0	155	1.55	50	0	277	GN0277	G/G	C/C	C/T	C/C	G/G	C/T
2	278		1809	2	62	0	0	158	1.58	62	1	278	GN0278	G/G	C/C	C/C	C/C	G/G	T/T
2	279		1810	1	54	0	0	169	1.69	64	0	279	GN0279	G/G	C/C	C/C	C/T	G/G	C/T
2	280		1811	1	57	0	0	168	1.68	60	0	280	GN0280	G/G	C/C	C/C	C/C	G/G	C/C
2	281		1812	1	52	0	0	172	1.72	65	0	281	GN0281	?	?	?	?	?	?
2	282		1813	1	54	0	0	167	1.67	74	1	282	GN0282	G/G	C/C	C/T	C/C	G/G	C/T
2	283		1814	1	56	0	0	166	1.66	70	1	283	GN0283	G/A	G/C	C/C	C/T	G/C	C/T
2	284		1815	1	52	0	0	170	1.7	69	0	284	GN0284	G/G	C/C	C/C	C/C	G/G	T/T
2	285		1816	1	50	0	0	168	1.68	60	0	285	GN0285	G/G	C/C	C/C	C/T	G/G	C/T
2	286		1817	1	62	0	0	169	1.69	64	0	286	GN0286	G/G	C/C	C/T	C/T	G/G	C/C
2	287		1818	1	40	0	0	175	1.75	75	1	287	GN0287	G/G	C/C	C/C	C/C	G/G	C/T
2	301		1819	1	49	0	0	172	1.72	74	1	301	GN0301	G/A	G/G	C/C	C/C	G/C	T/T
2	302		1820	1	53	0	0	170	1.7	70	1	302	GN0302	G/G	C/C	C/T	C/C	G/G	C/T
2	303		1821	1	45	0	0	169	1.69	64	0	303	GN0303	G/G	C/C	C/C	C/C	G/G	C/T
2	304		1822	1	48	0	0	176	1.76	70	0	304	GN0304	G/G	C/C	T/T	C/C	G/G	C/C
2	305		1823	1	43	0	0	172	1.72	64	0	305	GN0305	G/G	G/C	C/C	C/T	G/G	T/T
2	310		1824	1	61	0	0	168	1.68	94	1	310	GN0310	G/G	C/C	C/C	C/C	G/G	C/T
2	311		1825	1	51	0	0	178	1.78	80	1	311	GN0311	G/G	C/C	C/C	C/C	G/G	T/T
2	QH58		1826	1	69	0	0	165	1.65	67	1	QH58	QH58	G/G	C/C	C/T	C/C	G/G	C/T
2	QH59		1827	2	72	0	0	155	1.55	64	1	QH59	QH59	G/G	C/C	C/C	C/C	G/G	C/T
2	QH60		1828	1	55	0	0	168	1.68	68	1	QH60	QH60	G/A	C/C	C/C	C/C	G/C	C/C
2	QH61		1829	2	50	0	0	155	1.55	60	1	QH61	QH61	G/G	C/C	T/T	C/C	G/G	C/C
2	QH62		1830	2	56	0	0	160	1.6	65	1	QH62	QH62	G/G	C/C	C/C	C/T	G/G	T/T
2	QH63		1831	1	53	1	1	168	1.68	60	0	QH63	QH63	G/G	C/C	C/C	C/C	G/G	C/T
2	QH64		1832	2	55	0	0	158	1.58	48	0	QH64	QH64	G/G	C/C	C/T	C/C	G/G	C/C
2	QH66		1833	1	62	0	0	178	1.78	78	1	QH66	QH66	G/G	C/C	C/T	C/C	G/G	C/T
2	QH67		1834	2	64	0	0	157	1.57	67	1	QH67	QH67	G/A	G/C	C/T	T/T	G/C	C/T
2	QH68		1835	1	49	0	0	170	1.7	70	1	QH68	QH68	G/G	C/C	C/C	C/C	G/G	C/T
2	QH69		1836	1	63	0	0	167	1.67	65	0	QH69	QH69	G/G	C/C	C/C	C/C	G/G	C/T
2	QH70		1837	2	61	0	0	155	1.55	60	1	QH70	QH70	G/G	C/C	T/T	C/C	G/G	C/C
2	QH71		1838	1	51	0	0	170	1.7	75.5	1	QH71	QH71	G/G	C/C	T/T	C/C	G/G	C/C
2	QH72		1839	1	47	0	0	166	1.66	59	0	QH72	QH72	G/G	C/C	C/T	C/T	G/G	C/T
2	QH73		1840	1	49	0	0	170	1.7	60	0	QH73	QH73	G/G	C/C	C/C	C/C	G/G	T/T
2	QH74		1841	2	62	0	0	155	1.55	70	1	QH74	QH74	G/G	G/C	C/C	C/T	G/G	T/T
2	QH76		1842	1	40	0	0	166	1.66	59	0	QH76	QH76	G/G	G/C	C/C	C/T	G/G	T/T
2	QH78		1843	1	59	0	0	160	1.6	47	0	QH78	QH78	G/G	C/C	C/T	C/C	G/G	C/C
2	QH79		1844	1	49	0	0	168	1.68	60	0	QH79	QH79	G/G	G/C	T/T	C/T	G/G	C/C
2	QH80		1845	1	63	0	0	170	1.7	54	0	QH80	QH80	G/G	G/C	T/T	C/T	G/G	C/C
2	QH81		1846	1	49	0	0	165	1.65	80	1	QH81	QH81	G/G	C/C	C/T	C/C	G/G	C/T
2	QH83		1847	1	66	0	0	171	1.71	60	0	QH83	QH83	G/G	C/C	C/T	C/T	G/G	C/T
2	QH84		1848	1	42	1	1	164	1.64	62	0	QH84	QH84	G/G	C/C	C/C	C/T	G/G	C/T
2	QH85		1849	1	41	0	0	188	1.88	68	0	QH85	QH85	G/G	C/C	C/C	C/T	G/G	C/T
2	QH86		1850	2	56	0	0	156	1.56	70	1	QH86	QH86	G/G	G/C	C/C	C/T	G/G	C/T
2	QH87		1851	1	60	1	1	160	1.6	55	0	QH87	QH87	G/G	C/C	C/C	C/T	G/G	T/T
2	QH88		1852	1	65	1	0	172	1.72	64	0	QH88	QH88	G/G	C/C	C/C	C/T	G/G	C/T
2	QH90		1853	1	55	0	0	170	1.7	60	0	QH90	QH90	G/G	C/C	C/C	T/T	G/G	C/T
2	QH91		1854	1	63	1	1	165	1.65	60	0	QH91	QH91	G/G	C/C	C/C	C/C	G/G	T/T
2	QH92		1855	2	40	0	0	163	1.63	48	0	QH92	QH92	G/G	C/C	C/T	T/T	G/G	C/C
2	QH94		1856	1	50	0	1	178	1.78	70	0	QH94	QH94	G/G	C/C	C/C	C/C	G/G	T/T
2	QH96		1857	1	50	1	0	164	1.64	58	0	QH96	QH96	G/G	C/C	C/C	C/T	G/G	T/T
2	WYF001		1858	1	52	0	0	170	1.7	71	1	WYF001	WYF001	G/G	C/C	C/T	C/T	G/G	C/C
2	WYF024		1859	1	40	0	0	172	1.72	75	1	WYF024	WYF024	G/G	C/C	C/T	C/C	G/G	C/C
2	WYF031		1860	1	52	1	0	178	1.78	75	0	WYF031	WYF031	G/G	C/C	C/C	C/T	G/G	C/T
2	WYF044		1861	1	55	1	0	169	1.69	70	1	WYF044	WYF044	G/G	C/C	C/T	C/C	G/G	C/C
2	WYF053		1862	1	56	1	0	160	1.6	70	1	WYF053	WYF053	G/G	C/C	C/C	C/C	G/G	C/T
2	WYF056		1863	1	49	0	0	165	1.65	79	1	WYF056	WYF056	G/G	C/C	C/C	C/T	G/G	C/T
2	WYF065		1864	2	53	0	0	158	1.58	62	1	WYF065	WYF065	G/G	C/C	C/C	C/T	G/G	C/T
2	WYF076		1865	1	51	1	0	170	1.7	78	1	WYF076	WYF076	A/A	C/C	C/C	C/T	C/C	C/C
2	WYF080		1866	1	53	1	0	168	1.68	75	1	WYF080	WYF080	G/G	G/C	C/C	T/T	G/G	T/T
2	WYF088		1867	1	52	1	0	175	1.75	61	0	WYF088	WYF088	G/G	C/C	C/C	C/C	G/G	C/T
2	WYF090		1868	1	54	0	0	160	1.6	65	1	WYF090	WYF090	G/G	C/C	C/C	C/T	G/G	C/T
2	WYF096		1869	1	53	1	1	172	1.72	61	0	WYF096	WYF096	G/G	C/C	C/C	C/T	G/G	C/C
2	WYF098		1870	2	55	0	0	148	1.48	45	0	WYF098	WYF098	G/G	G/C	C/C	C/C	G/G	T/T
2	WYF101		1871	1	56	1	0	170	1.7	60	0	WYF101	WYF101	G/G	C/C	C/C	C/T	G/G	T/T
2	WYF124		1872	1	53	1	0	170	1.7	75	1	WYF124	WYF124	G/A	C/C	C/C	C/C	G/C	C/T
2	WYF155		1873	1	51	1	0	163	1.63	63	0	WYF155	WYF155	G/G	C/C	C/T	C/T	G/G	C/T
2	WYF161		1874	1	47	1	0	175	1.75	80	1	WYF161	WYF161	G/G	C/C	C/C	C/T	G/G	C/C
2	C102		1875	1	56	1	0	176	1.76	82	1	???389	C102	G/G	C/C	C/C	C/C	G/G	T/T
2	C107		1876	1	43	1	0	165	1.65	70	1	???512	C107	G/G	C/C	C/T	C/C	G/G	C/C
2	C109		1877	1	50	0	0	171	1.71	79	1	???521	C109	G/G	C/C	C/C	C/C	G/G	C/C
2	C111		1878	1	47	0	0	168	1.68	63	0	???552	C111	G/G	C/C	C/C	C/C	G/G	C/T
2	C114		1879	1	50	1	1	165	1.65	64	0	??338	C114	G/G	G/C	C/T	C/T	G/G	C/T
2	C115		1880	1	49	0	0	165	1.65	68	1	???396	C115	G/G	C/C	C/C	C/T	G/G	T/T
2	C119		1881	2	56	0	0	170	1.7	63	0	???231	C119	G/A	C/C	C/C	C/T	G/C	C/T
2	C133		1882	1	56	1	0	161	1.61	60	0	???623	C133	G/G	C/C	C/T	C/C	G/G	C/T
2	C14		1883	1	47	1	0	166	1.66	70	1	???671	C14	G/A	C/C	C/T	C/C	G/C	C/T
2	C148		1884	1	52	0	0	173	1.73	68	0	???277	C148	G/G	G/C	C/C	C/T	G/G	C/C
2	C15		1885	1	55	0	0	172	1.72	75	1	???672	C15	G/G	C/C	C/C	C/T	G/G	C/T
2	C154		1886	1	53	0	0	170	1.7	82	1	???220	C154	G/G	C/C	C/C	C/C	G/G	C/T
2	C155		1887	1	56	1	0	168	1.68	73	1	???685	C155	G/G	C/C	C/C	C/C	G/G	C/T
2	C160		1888	1	52	1	0	164	1.64	65	1	???586	C160	G/G	C/C	C/C	C/C	G/G	T/T
2	C162		1889	1	54	0	0	165	1.65	68	1	???242	C162	G/G	C/C	C/C	C/T	G/G	C/T
2	C167		1890	1	47	1	0	160	1.6	62	1	???366	C167	G/G	C/C	C/T	C/T	G/G	C/C
2	C169		1891	1	53	0	0	162	1.62	70	1	???421	C169	G/G	C/C	T/T	C/C	G/G	C/C
2	C171		1892	1	42	1	0	168	1.68	85	1	???666	C171	G/G	C/C	C/T	C/T	G/G	C/T
2	C173		1893	1	44	1	0	175	1.75	71	0	???488	C173	G/G	C/C	C/C	C/C	G/G	C/C
2	C174		1894	1	52	1	1	170	1.7	90	1	???211	C174	G/G	C/C	T/T	C/T	G/G	C/C
2	C176		1895	1	55	0	1	167	1.67	67	1	???205	C176	G/G	C/C	C/C	C/C	G/G	C/T
2	C178		1896	2	51	0	0	156	1.56	61	1	???404	C178	G/A	C/C	C/C	C/T	G/C	C/T
2	C186		1897	1	49	0	0	167	1.67	75	1	???525	C186	G/G	C/C	C/T	C/C	G/G	C/C
2	C188		1898	1	46	0	0	164	1.64	70	1	??332	C188	G/G	C/C	C/T	C/C	G/G	C/T
2	C19		1899	2	52	0	0	158	1.58	55	0	???300	C19	G/G	C/C	C/C	C/C	G/G	C/T
2	C193		1900	2	56	0	0	150	1.5	46	0	???616	C193	G/A	C/C	C/C	C/T	G/C	C/T
2	C197		1901	1	54	1	0	165	1.65	55	0	???673	C197	G/A	C/C	C/C	C/C	G/C	T/T
2	C202		1902	1	51	1	0	163	1.63	30	0	???237	C202	G/G	C/C	C/C	C/T	G/G	C/T
2	C206		1903	1	47	0	0	165	1.65	70	1	???621	C206	G/G	C/C	C/C	C/T	G/G	T/T
2	C21		1904	1	52	1	0	160	1.6	75	1	???196	C21	G/G	C/C	C/T	C/T	G/G	C/C
2	C217		1905	1	53	0	0	175	1.75	75	1	???619	C217	G/G	C/C	C/T	C/C	G/G	C/T
2	C220		1906	1	50	1	0	163	1.63	59	0	???617	C220	G/G	G/C	C/C	T/T	G/G	T/T
2	C228		1907	1	56	1	1	170	1.7	67	0	???112	C228	G/G	C/C	C/T	C/T	G/G	C/T
2	C232		1908	1	51	1	0	175	1.75	68	0	???298	C232	G/G	C/C	C/C	C/T	G/G	C/T
2	C235		1909	1	45	1	0	167	1.67	100	1	???527	C235	G/G	C/C	C/T	C/C	G/G	C/C
2	C236		1910	1	47	0	0	182	1.82	70	0	???490	C236	G/G	C/C	C/T	C/C	G/G	C/C
2	C243		1911	1	53	1	0	168	1.68	62	0	??320	C243	G/G	C/C	C/T	C/C	G/G	C/C
2	C244		1912	1	50	1	0	167	1.67	72	1	???679	C244	G/G	C/C	C/C	C/C	G/G	T/T
2	C249		1913	1	56	1	0	174	1.74	69	0	???79	C249	G/G	C/C	C/C	C/C	G/G	C/C
2	C257		1914	1	49	0	0	175	1.75	75	1	???532	C257	G/G	C/C	C/T	C/C	G/G	C/T
2	C258		1915	2	53	0	0	161	1.61	69	1	???682	C258	G/A	C/C	C/C	C/C	G/C	C/C
2	C262		1916	1	55	0	0	166	1.66	59	0	???186	C262	G/G	C/C	C/C	C/C	G/G	T/T
2	C27		1917	1	49	1	0	173	1.73	70	0	???283	C27	G/G	C/C	C/T	C/C	G/G	C/C
2	C270		1918	2	56	0	0	153	1.53	39	0	???441	C270	G/G	C/C	C/C	C/C	G/G	C/C
2	C275		1919	1	55	1	0	169	1.69	67	0	???520	C275	G/A	G/C	C/C	C/C	G/C	C/C
2	C284		1920	1	49	1	0	162	1.62	68	1	??353	C284	G/G	G/C	C/C	C/T	G/G	T/T
2	C285		1921	1	56	1	0	170	1.7	67	0	???362	C285	G/G	C/C	C/T	C/T	G/G	C/T
2	C288		1922	1	51	1	0	160	1.6	80	1	???664	C288	G/G	C/C	C/C	C/C	G/G	C/T
2	C300		1923	1	53	1	0	175	1.75	73	0	???492	C300	G/G	C/C	C/C	C/C	G/G	C/C
2	C43		1924	1	41	0	0	150	1.5	76	1	???431	C43	G/G	G/C	C/C	T/T	G/G	C/C
2	C44		1925	1	37	1	0	172	1.72	69	0	???197	C44	G/G	G/C	C/T	T/T	G/G	C/T
2	C5		1926	1	53	1	0	172	1.72	85	1	???229	C5	G/A	C/C	C/C	C/C	G/C	C/T
2	C57		1927	1	51	1	0	158	1.58	60	1	???479	C57	G/G	C/C	C/C	C/C	G/G	C/C
2	C61		1928	1	56	1	0	167	1.67	55	0	??341	C61	?	?	?	?	?	?
2	C70		1929	2	32	0	0	166	1.66	65	0	???531	C70	G/G	C/C	C/C	C/T	G/G	C/T
2	C71		1930	1	40	1	0	165	1.65	97	1	???99	C71	G/G	C/C	C/C	C/T	G/G	C/T
2	C74		1931	1	54	1	0	170	1.7	74	1	???397	C74	G/G	C/C	C/C	C/T	G/G	C/T
2	C78		1932	1	55	0	0	175	1.75	80	1	???489	C78	G/G	C/C	C/C	C/C	G/G	C/T
2	C80		1933	1	45	1	0	170	1.7	65	0	???376	C80	G/G	C/C	C/C	C/T	G/G	C/C
2	C83		1934	1	41	1	0	173	1.73	79	1	???240	C83	G/G	C/C	C/T	C/C	G/G	C/C
2	C87		1935	1	54	1	0	171	1.71	80	1	???607	C87	G/G	C/C	C/T	C/T	G/G	C/C
2	C9		1936	1	46	1	0	169	1.69	73	1	???216	C9	G/G	C/C	C/C	C/C	G/G	T/T
2	C95		1937	2	50	0	0	150	1.5	62	1	???25	C95	G/G	C/C	C/C	C/C	G/G	C/T
2	chd693		1938	1	42	1	0	170	1.7	78	1	???693	CHD693	G/G	G/C	C/C	C/T	G/G	C/C
2	chd704		1939	1	55	1	0	168	1.68	62	0	???704	CHD704	G/G	C/C	C/C	C/T	G/G	T/T
2	chd711		1940	1	56	1	0	170	1.7	66	0	???711	CHD711	G/G	C/C	T/T	C/T	G/G	C/C
2	chd721		1941	1	53	1	1	150	1.5	53	0	???721	CHD721	G/A	C/C	C/T	C/T	G/C	C/T
2	chd724		1942	1	48	1	0	172	1.72	82	1	???724	CHD724	G/G	C/C	C/T	C/T	G/G	C/T
2	chd731		1943	2	56	0	0	155	1.55	40	0	???731	CHD731	G/G	C/C	C/C	C/C	G/G	C/T
2	chd732		1944	1	53	0	0	160	1.6	62	1	???732	CHD732	G/G	C/C	C/T	C/C	G/G	C/T
2	chd733		1945	1	55	1	0	170	1.7	70	1	???733	CHD733	G/G	C/C	C/C	C/T	G/G	C/T
2	chd742		1946	1	54	1	0	170	1.7	70	1	???742	CHD742	G/G	C/C	C/C	C/C	G/G	C/T
2	chd743		1947	1	53	0	0	170	1.7	73	1	???743	CHD743	G/A	C/C	C/C	C/T	G/C	C/T
2	chd755		1948	1	54	1	0	170	1.7	81	1	???755	CHD755	G/G	C/C	C/C	C/C	G/G	T/T
2	chd757		1949	1	51	1	0	168	1.68	65	0	???757	CHD757	G/A	C/C	C/C	C/T	G/C	T/T
2	chd764		1950	1	53	1	0	162	1.62	72	1	???764	CHD764	G/G	C/C	C/C	C/C	G/G	T/T
2	chd770		1951	1	52	1	0	169	1.69	68	0	???770	CHD770	G/G	C/C	C/C	C/C	G/G	T/T
2	chd772		1952	1	53	1	0	183	1.83	95	1	???772	CHD772	G/G	C/C	C/C	C/T	G/G	T/T
2	chd799		1953	1	50	1	0	172	1.72	90	1	???799	CHD799	G/G	C/C	C/C	C/T	G/G	C/T
2	chd816		1954	1	53	0	0	176	1.76	66	0	???816	CHD816	G/G	C/C	C/C	C/C	G/G	C/T
2	chd824		1955	1	53	1	0	163	1.63	72	1	???824	CHD824	G/G	C/C	C/C	C/C	G/G	C/T
2	chd828		1956	1	54	0	0	169	1.69	76	1	???828	CHD828	G/A	C/C	C/C	C/C	G/C	T/T
2	chd830		1957	1	47	1	0	169	1.69	61	0	???830	CHD830	G/G	C/C	C/T	C/C	G/G	C/C
2	chd840		1958	1	55	0	0	175	1.75	74	1	???840	CHD840	G/G	C/C	C/T	C/C	G/G	C/T
2	chd844		1959	1	55	1	0	160	1.6	52	0	???844	CHD844	G/A	C/C	C/C	C/C	G/C	C/T
2	chd854		1960	1	44	1	0	170	1.7	78	1	???854	CHD854	G/G	C/C	C/C	C/T	G/G	T/T
2	chd855		1961	1	54	1	0	155	1.55	61	1	???855	CHD855	G/G	C/C	C/C	C/T	G/G	C/T
2	chd856		1962	2	50	0	0	165	1.65	67	1	???856	CHD856	G/G	C/C	C/T	C/C	G/G	C/T
2	chd860		1963	2	52	0	0	158	1.58	61	1	???860	CHD860	G/G	C/C	C/T	C/C	G/G	C/T
2	chd861		1964	1	53	1	0	175	1.75	80	1	???861	CHD861	G/A	C/C	C/C	C/T	G/C	T/T
2	chd865		1965	1	52	1	0	170	1.7	60	0	???865	CHD865	G/G	C/C	C/C	C/T	G/G	C/C
2	chd868		1966	1	50	0	0	173	1.73	68	0	???868	CHD868	G/G	C/C	C/C	C/C	G/G	T/T
